## Astrocytes close the critical period for visual plasticity

Jérôme Ribot<sup>1‡</sup>, Rachel Breton<sup>1,2,3‡#</sup>, Charles-Félix Calvo<sup>1</sup>, Julien Moulard<sup>1,4</sup>, Pascal Ezan<sup>1</sup>, Jonathan Zapata<sup>1</sup>, Kevin Samama<sup>1</sup>, Alexis-Pierre Bemelmans<sup>5</sup>, Valentin Sabatet<sup>6</sup>, Florent Dingli<sup>6</sup>, Damarys Loew<sup>6</sup>, Chantal Milleret<sup>1</sup>, Pierre Billuart<sup>7</sup>, Glenn Dallérac<sup>1‡#</sup>, Nathalie Rouach<sup>1‡\*</sup>

<sup>1</sup>Neuroglial Interactions in Cerebral Physiology, Center for Interdisciplinary Research in Biology, Collège de France, CNRS UMR 7241, INSERM U1050, Labex Memolife, PSL Research University Paris, France

<sup>2</sup>Doctoral School N°568, Paris Saclay University, PSL Research University, Le Kremlin Bicetre, France

<sup>3</sup>Astrocytes & Cognition, Paris-Saclay Institute for Neurosciences, CNRS UMR 9197, Paris-Saclay University, Orsay, France

<sup>4</sup>Doctoral School N°158, Sorbonne University, Paris France

<sup>5</sup>Commissariat à l’Energie Atomique et aux Energies Alternatives (CEA), Département de la Recherche Fondamentale, Institut de biologie François Jacob, MIRCen, and CNRS UMR 9199, Université Paris-Saclay, Neurodegenerative Diseases Laboratory, Fontenay-aux-Roses, France

<sup>6</sup>Institut Curie, PSL Research University, Mass Spectrometry and Proteomics Laboratory, Paris, France

<sup>7</sup>Université de Paris, Institute of Psychiatry and Neuroscience of Paris (IPNP), INSERM U1266, Genetic and Development of Cerebral Cortex Laboratory, GHU Paris Psychiatrie et Neurosciences, Hôpital Saint Anne, Paris, France

<sup>‡</sup>Equal contributing authors

<sup>‡</sup>Equal contributing authors

\*Correspondence to: [nathalie.rouach@college-de-france.fr](mailto:nathalie.rouach@college-de-france.fr)

<sup>#</sup>Present address: Astrocytes & Cognition, Paris-Saclay Institute for Neurosciences, CNRS UMR 9197, Paris-Saclay University, Orsay, France

## 37 **Summary paragraph**

38 Brain postnatal development is characterized by critical periods of experience-dependent  
39 remodeling<sup>1,2</sup>. Termination of these periods of intense plasticity is associated with settling of  
40 neuronal circuits, allowing for efficient information processing<sup>3</sup>. Failure to end critical periods  
41 thus results in neurodevelopmental disorders<sup>4,5</sup>. Yet, the cellular processes defining the timing  
42 of these developmental periods remain unclear. Here we show in the mouse visual cortex that  
43 astrocytes control the closure of the critical period. We uncover a novel underlying pathway  
44 involving regulation of the extracellular matrix that allows interneurons maturation via an  
45 unconventional astroglial connexin signaling. We find that timing of the critical period  
46 closure is controlled by a marked developmental upregulation of the astroglial protein  
47 connexin 30 that inhibits expression of the matrix degrading enzyme MMP9 through the  
48 RhoA-GTPase signaling pathway. Our results thus demonstrate that astrocytes not only  
49 influence activity and plasticity of single synapses, but are also key elements in the  
50 experience-dependent wiring of brain developing circuits. This work, by revealing that  
51 astrocytes promote the maturation of inhibitory circuits, hence provide a new cellular target to  
52 alleviate malfunctions associated to impaired closure of critical periods.

53

## 54 **Main text**

55 During the first weeks of life, massive synaptogenesis occurs and is followed by shaping of  
56 synaptic circuits<sup>6</sup>. In the last decades, the role of astroglial processes as structural and  
57 signaling partners of individual synapses has been established and their implication in  
58 neuronal network activities and cognitive functions has recently been unveiled<sup>7</sup>. Yet, whether  
59 they take part in the wiring of the neuronal circuitry that occurs during critical periods of  
60 postnatal development remains unknown. The visual cortex is a hallmark brain region of  
61 experience-dependent shaping of synaptic circuits during a period of enhanced plasticity that  
62 follows eyes opening<sup>2,8</sup>. Intriguingly, one pioneer study published 30 years ago showed that  
63 introducing immature astrocytes in adult cats re-opens a period of high plasticity, reminiscent  
64 of the critical period<sup>9</sup>. However, since then, whether and how maturation of astrocytes  
65 actually take part in the control of the critical periods closure has never been investigated.

66

## 67 **Immature astrocytes favor plasticity**

68 We first investigated the ability of immature astrocytes to promote visual cortex plasticity in  
69 adult mice. To this end, we cultured and labeled (lentivirus PGK-GFP) immature astrocytes  
70 from the cortex of P1-P3 (postnatal day 1-3) mice, and implanted them ten days later in the  
71 primary visual cortex (V1) of adult mice (P100), in which the critical period is closed (Fig.  
72 1a). Two weeks after the graft, we tested mice for ocular dominance (OD) plasticity, a form of  
73 plasticity typical of the critical period where changes in visual inputs alter the natural  
74 dominance of the contralateral eye. To do so, we assessed visual cortex activity using optical  
75 imaging of intrinsic signals after four days of monocular deprivation (MD) (Fig. 1a). We  
76 found that mice engrafted with immature astrocytes displayed a high level of plasticity, unlike  
77 control mice subjected to MD with injection of culture medium or non-injected mice (Fig. 1b-  
78 c). These data indicate that immature astrocytes re-open OD plasticity in adult mice.

79 To identify how immature astrocytes favor OD plasticity, we then investigated the molecular  
80 determinants of astroglial maturation. Comparing gene expression of immature (P7) vs mature

81 (P30) astrocytes using the transcriptome database for astrocytes during development<sup>10</sup>  
82 revealed about 200 genes that were differentially expressed with a fold-change over 5  
83 (Extended data Table 1). Gene Ontology analysis of enriched astroglial gene groups identified  
84 a functional switch during maturation from cell division to cell communication, with the cell  
85 junction genes being the most represented (Extended Table 2 and Fig. 1). Among these genes,  
86 *Gjb6*, encoding the astroglial gap-junction channel subunit connexin 30 (Cx30), displayed one  
87 of the highest increase in expression (Fold-change=9,  $P=0.0274$ ; Extended Data Table 1).  
88 Accordingly, we recently found that Cx30 regulates the structural maturation of hippocampal  
89 astrocytes during postnatal development<sup>11</sup>. Together, these data incited us to investigate the  
90 role of Cx30 in the astroglial control of the critical period. To do so, we first assessed the  
91 regional and temporal expression of Cx30 in the mouse V1. We found by  
92 immunohistochemistry that Cx30 is enriched in layer 4, the main V1 input layer, identified by  
93 Wisteria Floribunda Agglutinin (WFA), a marker of perineuronal nets important for the  
94 timecourse of the critical period<sup>12</sup>. This enrichment correlates with a high density of  
95 astrocytes labeled in the *Aldh111-gfp* mice (Fig. 1d). Moreover, Cx30 protein levels increased  
96 from P10 to P50, as shown by western blot (Fig. 1e), reaching its maximum when the critical  
97 period ends, thus suggesting that it may contribute to its closure. If so, re-opening a phase of  
98 high plasticity should be associated with a downregulation of Cx30. As a period of dark  
99 exposure (DE) can reinstate visual cortex plasticity during adulthood after closure of the  
100 critical period<sup>13,14</sup>, we placed wild-type adult mice (P50) in the dark for 4 days and quantified  
101 V1 Cx30 levels. We found that this manipulation drastically reduced Cx30 protein levels (~  
102 70%) (Fig. 1f). Remarkably, we also found that the same DE for 4 days induced by itself V1  
103 plasticity, as indicated by the change in OD index, which suggests that astroglial Cx30 is a  
104 brake to plasticity (Fig. 1g-h).

105

### 106 **Astroglial Cx30 closes the critical period**

107 We then directly investigated whether Cx30 inhibits OD plasticity. To do so, we first  
108 generated an astroglial knockdown mouse line for Cx30 (KD), where Cx30 expression is  
109 decreased in V1 astrocytes by ~70% (Extended data Fig. 2). In these mice, electroretinograms  
110 were unaltered, suggesting normal retinal functions (Extended Fig. 3). We found that OD  
111 plasticity peaked at P28 in wild-type (WT) mice. In contrast, this plasticity continued to  
112 increase in KD mice until P50, indicating an impairment in the closure of the critical period  
113 (Fig. 2a, b). While in WT mice this plasticity was due to an increase in the open eye response,  
114 in KD mice, it resulted from a reduction of the closed eye response, which typically reflects  
115 changes occurring in mature and immature system, respectively<sup>15</sup>. These data thus indicate  
116 that Cx30 is required for proper maturation of the visual cortex.

117 To further directly test that the expression of Cx30 in mature astrocytes inhibits OD plasticity,  
118 we grafted mature astrocytes expressing or not Cx30, isolated from P19 wild type or  
119 constitutive Cx30 knockout mice, respectively (Fig. 2d, e). By doing so, we found that only  
120 the graft of mature astrocytes lacking Cx30 re-opened OD plasticity in adult mice (Fig. 2f).  
121 Altogether, these data indicate that astroglial Cx30 controls the timing of the critical period  
122 closure.

123

124

### 125 **Astroglial Cx30 promotes the maturation of inhibitory circuits**

126 The temporal course of visual cortex critical period is determined by the maturation of local  
127 inhibitory circuits controlling the excitation-inhibition (E-I) balance<sup>16-18</sup>. To get insights on  
128 the physiological processes via which Cx30 closes the critical period, we thus measured  
129 changes in excitatory and inhibitory synaptic transmission following MD in pyramidal  
130 neurons from layer 4 visual cortex of WT and KD adult mice (P50) (Fig. 3a). The frequency,  
131 but not the amplitude, of both spontaneous excitatory and inhibitory postsynaptic currents  
132 (sEPSCs and sIPSCs) were markedly reduced in KD mice compared to WT (Fig. 3b-c). In  
133 addition, MD induced an increase in the frequency of sEPSC and sIPSCs in KD mice while it  
134 had no effect in WT, indicating that experience-dependent plasticity of both excitatory and  
135 inhibitory synapses occurs in adult KD, but not in WT mice. As excitation and inhibition  
136 influence each other through homeostatic processes<sup>19</sup>, we then assessed whether the E-I  
137 balance was affected by analyzing the dynamic conductances of evoked composite synaptic  
138 responses. We found the inhibition/excitation ratio to be reduced in KD mice (Fig. 3d-e), thus  
139 indicating functionally that inhibition is primarily affected by Cx30 downregulation. Further,  
140 as found for the sEPSC/sIPSC data, I-E ratio increased when plasticity was induced through  
141 MD. Together, these data suggest that experience-dependent maturation of inhibitory circuits  
142 ending the critical period requires astroglial Cx30. To investigate this possibility, we assessed  
143 maturity of PV interneurons, which settle visual cortex inhibition, by determining the  
144 abundance of their perineuronal nets (PNN) of extracellular matrix (ECM) proteins<sup>12</sup>. We  
145 found PNN to be significantly smaller in KD mice (Fig. 3f-g), thus revealing the immaturity  
146 of these cells. In addition, while MD also decreased PNN in WT mice, it had no further effect  
147 in KD mice, suggesting that reduction of PNN is a prerequisite for plasticity. Together, these  
148 data indicate that the developmental rise of Cx30 during the critical period is required for the  
149 timely maturation of visual cortex inhibition.

150

### 151 **Astroglial Cx30 closes the critical period by downregulating the RhoA-MMP9 pathway**

152 We then sought to identify the molecular pathway through which Cx30 modulates PNN extent  
153 and maturation of PV interneurons. To this end we performed co-immunoprecipitation  
154 experiments with biotinylated WFA lectin followed by quantitative proteomics of pulled  
155 down proteins in WT and KD mice using label-free mass spectrometry. Reactome pathway  
156 analysis of enriched or unique proteins in WT compared to KD samples indicated an  
157 enrichment of proteins associated with the Rho GTPases-KTN1 pathway (Extended data  
158 Table 3, Fig. 4a upper panel). Conversely, analysis of proteins unique and enriched in KD  
159 compared to WT samples revealed enrichment of the RhoGTPases-ROCK pathway (Extended  
160 data Table 3, Fig. 4a). Besides, mass spectrometry analysis of Cx30 co-immunoprecipitates  
161 indicated interactions with Rho-GTPases signaling pathways, among which the Rho-  
162 associated protein kinase ROCK2 was significantly enriched in KD compared to WT  
163 (Extended data Table 4, Fig. 4a lower panel). Together, this exploratory approach points to a  
164 role of the Rho family of GTPases in the PNN changes between WT and KD mice.

165 RhoA, one family member of the Rho-GTPases, plays a key role in cell remodeling<sup>20</sup> through  
166 activation of ROCKs and its interactions with different connexins has been described in other  
167 cell types<sup>21,22</sup>. We thus tested the activation of RhoA by assessing levels of RhoA-GTP using  
168 immunohistochemistry, and found a strong increase in KD mice (Fig. 4b). In addition, while

169 MD also increased RhoA-GTP in WT mice, it had no further effect in KD mice, suggesting  
170 that activation of RhoA pathway is a prerequisite for plasticity.

171 As the RhoA-ROCK pathway can modulate the expression of the ECM degrading enzyme  
172 Matrix Metalloproteinase-9 (MMP9)<sup>23,24</sup>, we next tested whether this signaling is involved in  
173 the Cx30 regulation of PNNs and PV interneurons maturation. To do so, we assessed MMP9  
174 expression in layer 4 of the visual cortex, and found that MMP9 levels were markedly  
175 increased in KD mice compared to WT mice (Fig. 4c). In addition, akin to RhoA-GTP, while  
176 MD increased MMP9 levels in WT mice, it had no additional effect in KD mice (Fig. 4c).  
177 This suggests that activation of the RhoA-ROCK pathway leads to the degradation of PNNs  
178 through MMP9 in both KD mice and WT mice under MD condition. We next directly tested  
179 this hypothesis by inhibiting the ROCK signaling pathway in vivo with fasudil (Fig. 4d) and  
180 found that it rescued both MMP9 levels and PNN extent in KD mice, while it had no effect in  
181 WT mice (Fig. 4e, f). These data therefore indicate that astroglial Cx30 regulates MMP9  
182 levels and PV cell maturation via the RhoA-ROCK signaling pathway.

183

## 184 Discussion

185 We here demonstrate that astrocytes control timing for closure of the postnatal critical period  
186 of experience-dependent remodeling. We further identify that they achieve this through  
187 developmental rise of the astroglial protein Cx30, which we found to inhibit expression of  
188 MMP9 via the RhoA-ROCK pathway, thereby hindering maturation of local inhibition. While  
189 the latter is established as a trigger for critical period closure, its control by astroglial  
190 signaling place astrocytes as key elements orchestrating the shaping of synaptic circuits.  
191 Beyond its role in critical period, the identified pathway may well be involved in structural  
192 synaptic plasticity associated with cognitive functions, since we previously found that Cx30  
193 regulates the structure and efficacy of the tripartite synapse in the hippocampus<sup>25</sup>. The  
194 regulation of MMP9 levels that we here describe occurs via an unconventional signaling  
195 through Cx30 and thus represents a novel astroglial pathway regulating wiring of brain  
196 circuits. Because extended critical periods are associated with neurodevelopmental defects  
197 resulting in sensori-motor or psychiatric disorders<sup>4,5</sup>, these findings provide a new target for  
198 the development of strategies aiming at re-inducing a period of enhanced plasticity in adults  
199 and favor rehabilitation after brain damage or developmental malfunction.

200

## 201 References

- 202 1 Espinosa, J. S. & Stryker, M. P. Development and plasticity of the primary visual  
203 cortex. *Neuron* **75**, 230-249, doi:10.1016/j.neuron.2012.06.009 (2012).
- 204 2 Hubel, D. H. & Wiesel, T. N. The period of susceptibility to the physiological effects  
205 of unilateral eye closure in kittens. *J Physiol* **206**, 419-436,  
206 doi:10.1113/jphysiol.1970.sp009022 (1970).
- 207 3 Hensch, T. K. Critical period regulation. *Annu Rev Neurosci* **27**, 549-579,  
208 doi:10.1146/annurev.neuro.27.070203.144327 (2004).
- 209 4 LeBlanc, J. J. & Fagiolini, M. Autism: a "critical period" disorder? *Neural Plast* **2011**,  
210 921680, doi:10.1155/2011/921680 (2011).

- 211 5 Meredith, R. M. Sensitive and critical periods during neurotypical and aberrant  
212 neurodevelopment: a framework for neurodevelopmental disorders. *Neurosci*  
213 *Biobehav Rev* **50**, 180-188, doi:10.1016/j.neubiorev.2014.12.001 (2015).
- 214 6 Doll, C. A. & Brodie, K. Impaired activity-dependent neural circuit assembly and  
215 refinement in autism spectrum disorder genetic models. *Front Cell Neurosci* **8**, 30,  
216 doi:10.3389/fncel.2014.00030 (2014).
- 217 7 Clarke, L. E. & Barres, B. A. Emerging roles of astrocytes in neural circuit  
218 development. *Nat Rev Neurosci* **14**, 311-321, doi:10.1038/nrn3484 (2013).
- 219 8 Lehmann, K. & Lowel, S. Age-dependent ocular dominance plasticity in adult mice.  
220 *PLoS One* **3**, e3120, doi:10.1371/journal.pone.0003120 (2008).
- 221 9 Muller, C. M. & Best, J. Ocular dominance plasticity in adult cat visual cortex after  
222 transplantation of cultured astrocytes. *Nature* **342**, 427-430, doi:10.1038/342427a0  
223 (1989).
- 224 10 Cahoy, J. D. *et al.* A transcriptome database for astrocytes, neurons, and  
225 oligodendrocytes: a new resource for understanding brain development and function. *J*  
226 *Neurosci* **28**, 264-278, doi:10.1523/JNEUROSCI.4178-07.2008 (2008).
- 227 11 Ghezali, G. *et al.* Connexin 30 controls astroglial polarization during postnatal brain  
228 development. *Development* **145**, doi:10.1242/dev.155275 (2018).
- 229 12 Pizzorusso, T. *et al.* Reactivation of ocular dominance plasticity in the adult visual  
230 cortex. *Science* **298**, 1248-1251, doi:10.1126/science.1072699 (2002).
- 231 13 Erchova, I., Vasalauskaite, A., Longo, V. & Sengpiel, F. Enhancement of visual cortex  
232 plasticity by dark exposure. *Philos Trans R Soc Lond B Biol Sci* **372**,  
233 doi:10.1098/rstb.2016.0159 (2017).
- 234 14 He, H. Y., Ray, B., Dennis, K. & Quinlan, E. M. Experience-dependent recovery of  
235 vision following chronic deprivation amblyopia. *Nat Neurosci* **10**, 1134-1136,  
236 doi:10.1038/nn1965 (2007).
- 237 15 Hofer, S. B., Mrsic-Flogel, T. D., Bonhoeffer, T. & Hubener, M. Lifelong learning:  
238 ocular dominance plasticity in mouse visual cortex. *Curr Opin Neurobiol* **16**, 451-459,  
239 doi:10.1016/j.conb.2006.06.007 (2006).
- 240 16 Di Cristo, G. *et al.* Activity-dependent PSA expression regulates inhibitory maturation  
241 and onset of critical period plasticity. *Nat Neurosci* **10**, 1569-1577,  
242 doi:10.1038/nn2008 (2007).
- 243 17 Hensch, T. K. *et al.* Local GABA circuit control of experience-dependent plasticity in  
244 developing visual cortex. *Science* **282**, 1504-1508, doi:10.1126/science.282.5393.1504  
245 (1998).
- 246 18 Tropea, D. *et al.* Gene expression changes and molecular pathways mediating activity-  
247 dependent plasticity in visual cortex. *Nat Neurosci* **9**, 660-668, doi:10.1038/nn1689  
248 (2006).
- 249 19 Turrigiano, G. G. & Nelson, S. B. Homeostatic plasticity in the developing nervous  
250 system. *Nat Rev Neurosci* **5**, 97-107, doi:10.1038/nrn1327 (2004).
- 251 20 Gonzalez-Billault, C. *et al.* The role of small GTPases in neuronal morphogenesis and  
252 polarity. *Cytoskeleton (Hoboken)* **69**, 464-485, doi:10.1002/cm.21034 (2012).
- 253 21 Kim, H. J. *et al.* RhoA/ROCK Regulates Prion Pathogenesis by Controlling Connexin  
254 43 Activity. *Int J Mol Sci* **21**, doi:10.3390/ijms21041255 (2020).

- 255 22 Mendoza-Naranjo, A. *et al.* Targeting Cx43 and N-cadherin, which are abnormally  
256 upregulated in venous leg ulcers, influences migration, adhesion and activation of Rho  
257 GTPases. *PLoS One* **7**, e37374, doi:10.1371/journal.pone.0037374 (2012).
- 258 23 Jeong, K. J. *et al.* The Rho/ROCK pathway for lysophosphatidic acid-induced  
259 proteolytic enzyme expression and ovarian cancer cell invasion. *Oncogene* **31**, 4279-  
260 4289, doi:10.1038/onc.2011.595 (2012).
- 261 24 Tong, L. & Tergaonkar, V. Rho protein GTPases and their interactions with  
262 NFkappaB: crossroads of inflammation and matrix biology. *Biosci Rep* **34**,  
263 doi:10.1042/BSR20140021 (2014).
- 264 25 Pannasch, U. *et al.* Connexin 30 sets synaptic strength by controlling astroglial  
265 synapse invasion. *Nat Neurosci* **17**, 549-558, doi:10.1038/nn.3662 (2014).
- 266

### 267 **Acknowledgments**

268 This work was supported by grants from the European Research Council (Consolidator grant  
269 #683154), European Union's Horizon 2020 research and innovation program (Marie  
270 Sklodowska-Curie Innovative Training Networks, grant #722053, EU-GliaPhD) and  
271 UNADEV-Aviesan to N.R., from Région Ile-de-France and Fondation pour la Recherche  
272 Médicale to D.L., from College de France to G.D., from Fyssen Foundation to J.Z. and from  
273 French Research Ministry (Biosigne Doctoral school) to R.B. The authors thank Noëlle  
274 Dufour, Charlène Joséphine and MIRCen's viral vector facility, the animal and imaging  
275 facilities of College de France as well as Michel Roux from the mouse clinical institute for  
276 excellent technical assistance.

277

### 278 **Author Contributions**

279 Conceptualization: N.R., G.D., J.R. C.M.; Data curation: G.D., J.R., R.B. D.L., N.R.; Formal  
280 analysis: G.D., J.R., R.B., P.B., J.Z., V.S., D.L., N.R.; Funding acquisition: N.R., G.D.;  
281 Investigation: J.R., R.B., G.D., C.F.C., F.D., P.E., K.S., J. Z., N.R.; Methodology: J.R., G.D.,  
282 J.M.; Resources: D.L., A.P.B.; Supervision: N.R., G.D.; Project administration: N.R.;  
283 Validation: J.R., G.D., N.R.; Visualization: J.R., R.B., G.D., N.R.; Writing original draft:  
284 G.D., N.R.; Writing – review & editing: all authors.

285

### 286 **Competing interests**

287 The authors declare no competing interests.

288

### 289 **Additional Information**

290

291 **Supplementary Information** is available for this paper.

292

293 **Correspondence and requests for materials** should be addressed to N.R.

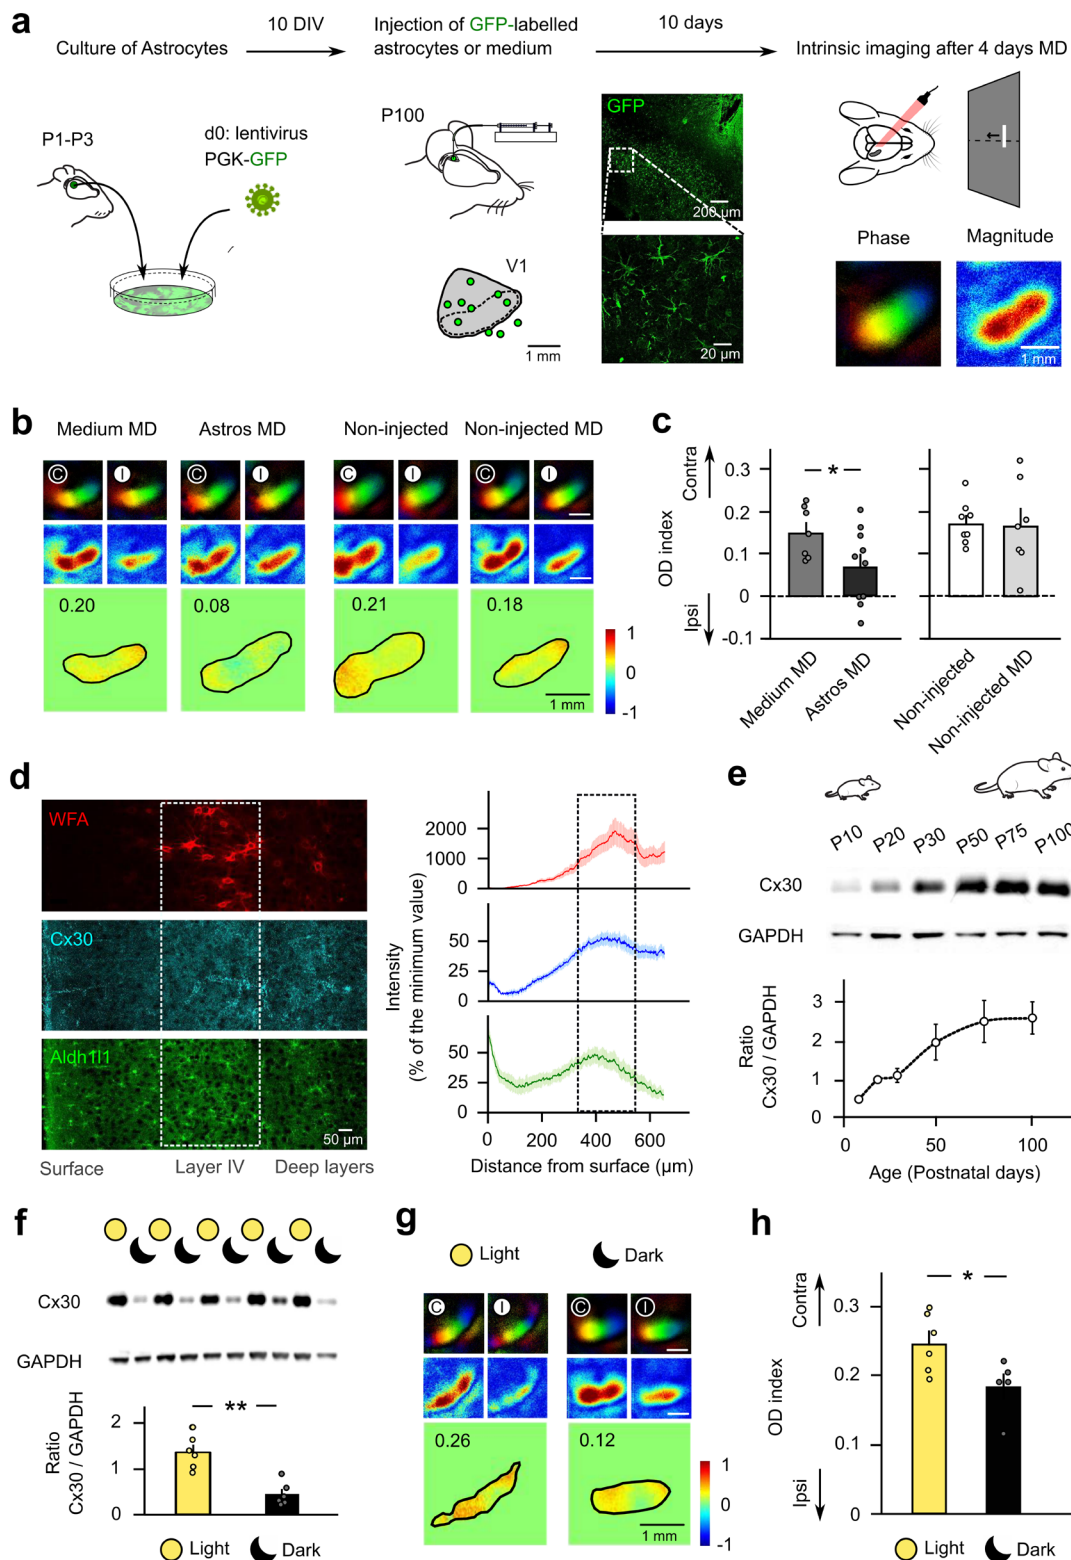

294  
295  
296  
297  
298  
299  
300  
301

**Figure 1. Immature astrocytes favor cortical plasticity.** (a) Immature astrocytes from P1-P3 mice were transduced with PGK-GFP lentivirus, cultured for 10 DIV, and injected in the V1 area of adult mice (P100), as shown on the schematic (green circles), where the dashed line represents the binocular zone. Confocal images of GFP-expressing astrocytes integrated in the visual cortex of injected mice are shown. Intrinsic optical imaging was then conducted to record phase and magnitude retinotopic maps for each eye stimulation after 4 days of monocular deprivation (MD). (b) These maps are shown in top panels for animals injected



302 with control medium (Medium MD, n=7) or immature astrocytes (Astro MD, n=10) and for  
303 non-injected mice in control (non-injected, n=8) or MD (non-injected MD, n=7) conditions.  
304 Stimulated contralateral (C) and ipsilateral (I) eyes are indicated with a white (open) or black  
305 (closed) circle. Bottom panels show the normalized OD map with average value inset. (c)  
306 Mice injected with immature astrocytes showed a marked increase in OD plasticity compared  
307 with control mice injected with culture medium (P=0.043, DF=15, two-tailed t-test), while no  
308 effect was observed in non-injected mice (P=0.899, DF=13, two-tailed t-test). (d)  
309 Representative immunostaining for WFA (top), Cx30 (middle) and Aldh111 (bottom) in V1 of  
310 P50 mouse (left panels), and corresponding quantification of spatial distributions across V1  
311 layers (right panels, n=3 mice). (e) Western blot analysis reveals changes in Cx30 levels in  
312 the visual cortex during development (n=6 per age, P=0.0001, Kruskal-Wallis (KW=22.31))  
313 and (f) after 4 days of dark exposure (n=6 per group, P=0.0022, U=0, Mann-Whitney test). (g)  
314 Intrinsic optical imaging for light (n=6) and dark (n=5) exposed animals showing that (h) dark  
315 exposure decreased OD index (P=0.035, DF=9, two-tailed t-test).

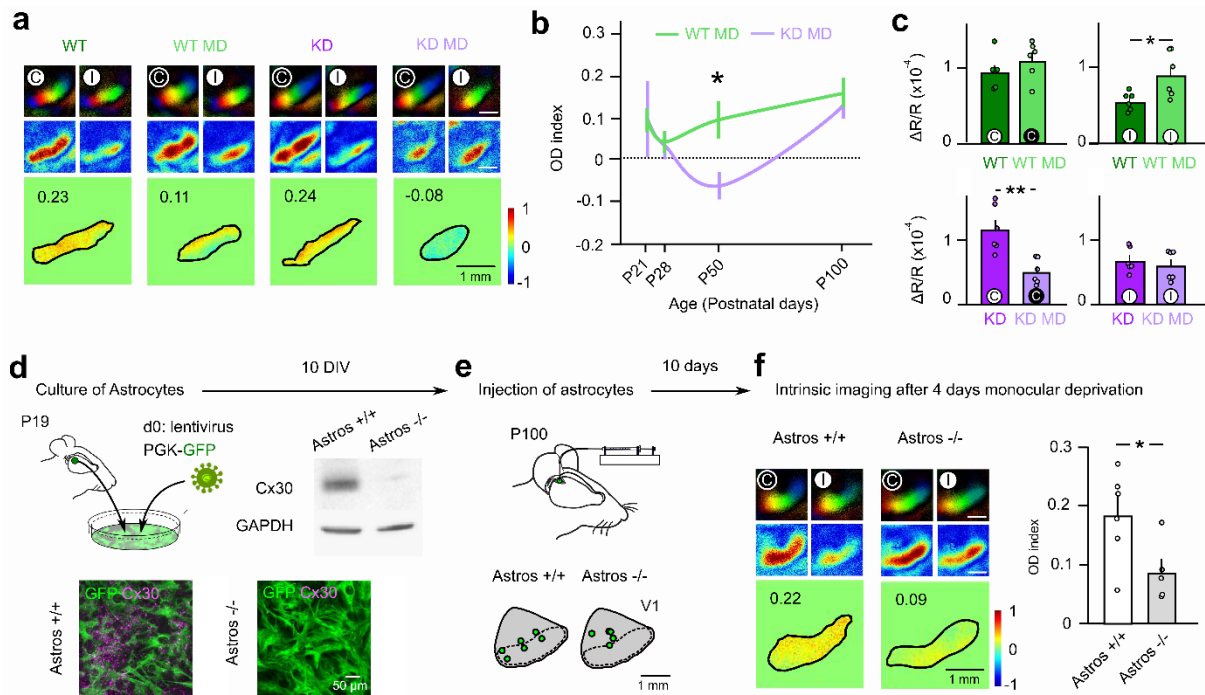

316

317 **Figure 2. Astroglial connexin 30 closes the critical period.** (a) Functional maps in P50  
 318 wild-type (WT) and Cx30 knockdown (KD) mice in control and MD conditions. (b)  
 319 Developmental profile of OD index after MD in WT (P21, n=6; P28, n=7; P50, n=6; P100,  
 320 n=7) and KD mice (P21, n=3; P28, n=8; P50, n=6; P100, n=11), indicating a protracted and  
 321 enhanced plasticity at P50 in KD mice ( $P=0.0232$ ,  $DF=46$ , two-way ANOVA followed by  
 322 Sidak post-hoc test). (c) Changes in response magnitude after MD in P50 mice result from an  
 323 increased response to the open (ipsilateral, I) eye stimulation in WT mice ( $n=6$ ,  $P=0.0411$ ,  
 324  $U=5$ , Mann Whitney test), and from a decreased response to the closed (contralateral, C) eye  
 325 stimulation in KD mice ( $n=6$ ,  $P=0.0022$ ,  $U=0$ , Mann-Whitney test). (d) Mature astrocytes  
 326 expressing or not Cx30 were isolated from P19 WT (Astro +/+) or constitutive Cx30  
 327 knockout mice (Astros -/-), respectively, and were then transduced with PGK-GFP  
 328 lentiviruses and cultured for 10 DIV. Western blots and immunostaining show expression of  
 329 Cx30 in Astro +/+, but not in Astro -/-. (e) The cultured astrocytes were injected in adult mice  
 330 (P100), as shown on the schematics (green circles). (f) Functional maps show that OD  
 331 plasticity is enhanced in mice injected with Astro -/- ( $n=5$ ) compared to mice injected with  
 332 Astro +/+ ( $n=6$ ,  $P=0.038$ ,  $DF=9$ , two-tailed t-test).

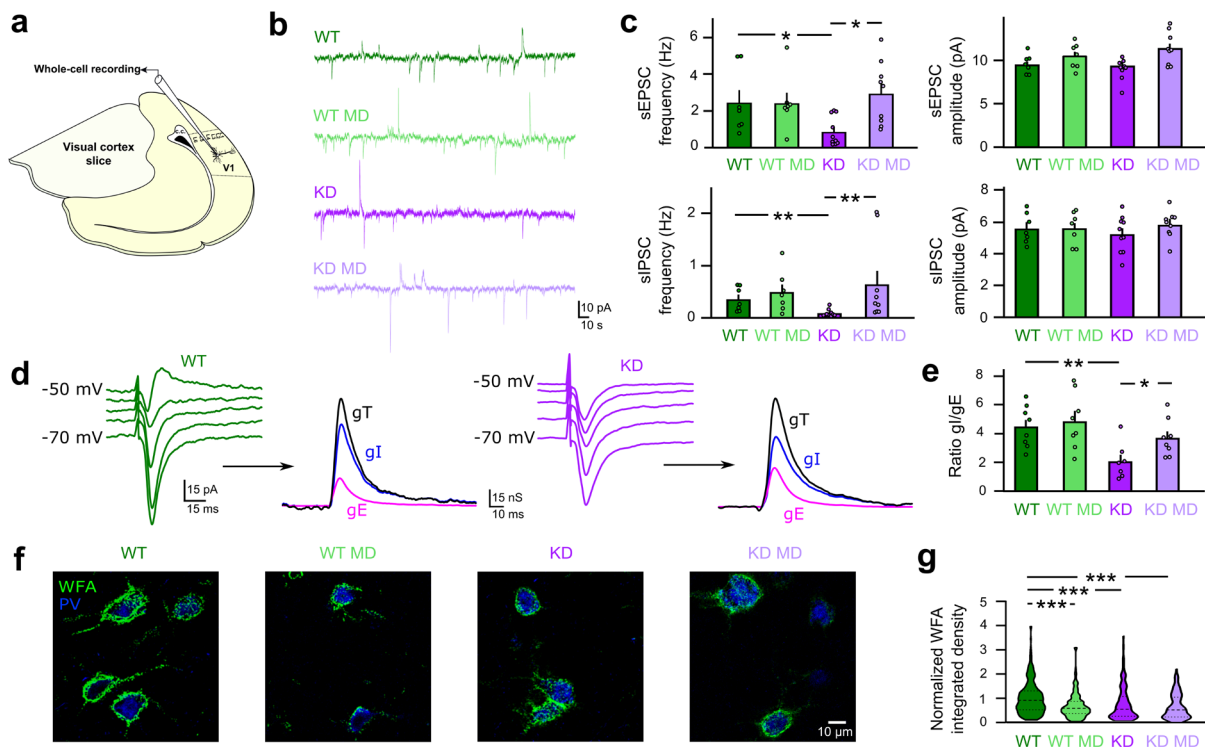

333

334

335

336

337

338

339

340

341

342

343

344

345

346

347

348

349

350

351

**Figure 3. Astroglial Cx30 promotes the maturation of inhibitory circuits.** (a) Schematic diagram depicting the brain slice from which V1 pyramidal neurons from layer 4 were recorded. (b) Example traces of sEPSCs (inward) and sIPSCs (outward) currents. (c) Frequency, but not amplitude, of both sEPSCs ( $P=0.0192$ ,  $U=11$ , Mann-Whitney test) and sIPSCs ( $P=0.0034$ ,  $U=5$ , Mann-Whitney test) was decreased in KD ( $n=10$ ) compared to WT mice ( $n=7$ ). MD induced no plasticity in WT mice ( $n=7$ ,  $P=0.7027$ ,  $U=19$  for sEPSCs,  $P=0.6547$   $U=21$ , for sIPSCs, Mann-Whitney test), while it potentiated both the sEPSCs ( $P=0.0090$ ,  $U=13$ , Mann-Whitney test) and sIPSCs ( $P=0.0019$ ,  $U=13$ , Mann-Whitney test) in KD mice ( $n=9$ ). (d) Example of evoked composite responses at increasing holding potentials allowing decomposition of the total conductance (gT) into excitatory (gE) and inhibitory (gI) conductances in WT and KD mice. (e) Inhibition/Excitation (I/E) ratio was reduced in KD mice ( $n=7$ ,  $P=0.0078$ ,  $U=5$ , Mann-Whitney test) compared to WT ( $n=8$ ). MD induced no change in WT mice ( $n=8$ ,  $P=0.7527$ ,  $U=29$ , Mann-Whitney test), while it increased the I/E ratio in KD mice ( $n=8$ ,  $P=0.020$ ,  $U=8$ , Mann-Whitney test). (f) WFA immunostaining and (g) violin plot showing smaller perineuronal nets around PV interneurons in KD ( $n=177$  cells from 16 mice,  $P<0.0001$ ), WT MD ( $n=171$  cells from 6 mice,  $P=0.0007$ ) and KD MD mice ( $n=133$  cells from 3 mice,  $p<0.0001$ ) compared to WT mice ( $n=226$  cells from 16 mice) (Kruskal-Wallis (KW= 45.64) followed by Dunn's multiple comparisons post-hoc).

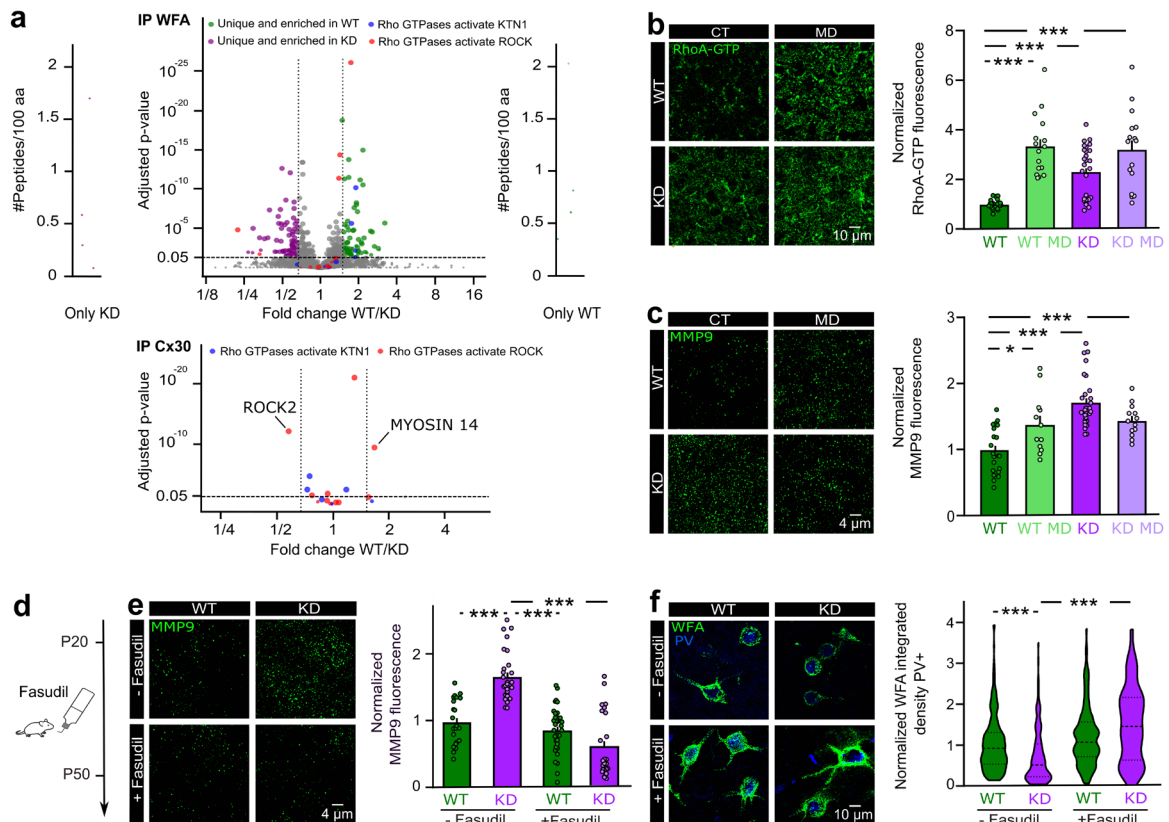

352

353

354

355

356

357

358

359

360

361

362

363

364

365

366

367

368

369

370

371

372

373

374

375

376

**Figure 4. Astroglial Cx30 downregulates the RhoA-MMP9 pathway.** (a) Top, volcano plot analysis representing the 2096 quantified proteins with at least 3 total peptides in all replicates enriched with biotinylated WFA lectin in KD and WT mice. Binding partners were obtained by using quantitative label-free mass spectrometry analysis performed from three replicates. Dashed vertical lines denote absolute fold change of 1.5 and the dashed horizontal line denotes the adjusted P-value of ratio significance of 0.05. Selected enriched proteins in WT (green) and KD (purple) samples are shown. Proteins from the enriched pathways Rho-GTPase activate KTN1 (blue) and Rho-GTPase activate ROCK (red) are highlighted. External plots show proteins with peptides identified only in one sample type (left in KD and right in WT). Bottom, volcano plot analysis representing interactors of Cx30 from the Rho-GTPase activate KTN1 (blue) and Rho-GTPase activate ROCK (red) pathways. The fold-change in WT (n=5) versus KD mice (n=4) are shown with selected proteins (Rock2 and Myosin 14) quantified with an absolute fold change  $\geq 1.5$ , an adjusted P-value  $\leq 0.05$  and with  $\geq 3$  peptides. (b) Immunostaining for RhoA-GTP showed a marked increase in KD (n=27, P=0.0003), KD MD (n=16, P<0.0001) and WT MD mice (n=16, P<0.0001) compared to WT mice (n=22) (slices from 3 mice per group) (Kruskal-Wallis (KW=41.23) followed by Dunn's post-hoc test). (c) Immunostaining for MMP9 shows a marked increase in KD mice (n=28, P<0.0001, DF=71), KD MD (n=13, P=0.0059, DF=71) and MD mice (n=12, P=0.0322, DF=71) compared to WT mice (n=22) (ANOVA (F(3,71)=15.07) followed by Tukey's post-hoc test). (d) Diagram depicting the protocol for experimental treatment with Fasudil. (e) Fasudil rescued MMP9 levels in KD mice (KD+Fasudil: n=25 from 5 mice, KD=28 slices from 3 mice, P<0.0001), while it had no effect in WT mice (WT+Fasudil: n=34 from 6 mice, WT: 22 slices from 3 mice, P>0.9999, Kruskal-Wallis (KW=55.98) followed by Dunn's post-hoc test). (f) Fasudil rescued perineuronal nets levels in KD mice (KD+Fasudil:

377 n=52 from 5 mice; KD, n=177 from 16 mice,  $P < 0.0001$ ) while it had no effect in WT mice  
378 (WT+Fasudil, n=129 from 6 mice, WT, n=226 from 16 mice,  $P = 0.1510$ ) (Kruskall-Wallis  
379 (KW=71.65) followed by Dunn's post-hoc test).

## Extended Data for

### **Astrocytes close the critical period for visual plasticity**

Jérôme Ribot<sup>1‡</sup>, Rachel Breton<sup>1,2‡#</sup>, Charles-Félix Calvo<sup>1</sup>, Julien Moulard<sup>1</sup>, Pascal Ezan<sup>1</sup>, Jonathan Zapata<sup>1</sup>, Kevin Samama<sup>1</sup>, Alexis-Pierre Bemelmans<sup>3</sup>, Valentin Sabatet<sup>4</sup>, Florent Dingli<sup>4</sup>, Damarys Loew<sup>4</sup>, Chantal Milleret<sup>1</sup>, Pierre Billuart<sup>5</sup>, Glenn Dallérac<sup>1‡#</sup>, Nathalie Rouach<sup>1‡\*</sup>

\*Correspondence to: [nathalie.rouach@college-de-france.fr](mailto:nathalie.rouach@college-de-france.fr)

#### **This PDF file includes:**

Extended Data Figures 1-3

Tables 1-4

| Probe ID              | Gene,symbol         | Gene,title                                                        | adj,P,Val | Fold-Change in mature over immature astrocytes |
|-----------------------|---------------------|-------------------------------------------------------------------|-----------|------------------------------------------------|
| <b>Enriched genes</b> |                     |                                                                   |           |                                                |
| 1441430_at            | cDNA1               | UI-M-DJ2-bwb-i-13-0-UI.s1 NIH_BMAP_DJ2 Mus musculus cDN/          | 0.0185    | 111.4304721                                    |
| 1452975_at            | Etnppl              | ethanolamine phosphate phospholyase                               | 0.019     | 78.24897777                                    |
| 1433785_at            | Mobp                | myelin-associated oligodendrocytic basic protein                  | 0.019     | 34.2967508                                     |
| 1443745_s_at          | Dmp1                | dentin matrix protein 1                                           | 0.019     | 28.4429658                                     |
| 1421425_a_at          | Rcan2               | regulator of calcineurin 2                                        | 0.019     | 24.08394796                                    |
| 1455913_x_at          | Ttr                 | transthyretin                                                     | 0.019     | 19.56224444                                    |
| 1419300_at            | Flt1                | FMS-like tyrosine kinase 1                                        | 0.0222    | 18.50701094                                    |
| 1417185_at            | Ly6a                | lymphocyte antigen 6 complex, locus A                             | 0.019     | 16.56423878                                    |
| 1418091_at            | Tfcp2l1             | transcription factor CP2-like 1                                   | 0.019     | 16.1112888                                     |
| 1427345_a_at          | Sult1a1             | sulfotransferase family 1A, phenol-preferring, member 1           | 0.019     | 15.45498126                                    |
| 1417852_x_at          | Clca3a1             | chloride channel accessory 3A1                                    | 0.0214    | 15.24220797                                    |
| 1456228_x_at          | Mbp                 | myelin basic protein                                              | 0.019     | 14.92852786                                    |
| 1427183_at            | Efemp1              | epidermal growth factor-containing fibulin-like extracellular n   | 0.0246    | 13.08643294                                    |
| 1435918_at            | Fam107a             | family with sequence similarity 107, member A                     | 0.019     | 12.38051995                                    |
| 1450468_at            | Myoc                | myocilin                                                          | 0.0227    | 10.55606329                                    |
| 1435851_at            | Lgi1                | leucine-rich repeat LGI family, member 1                          | 0.019     | 10.41073484                                    |
| 1440225_at            | Adgrf5              | adhesion G protein-coupled receptor F5                            | 0.0227    | 10.056107                                      |
| 1429166_s_at          | Clmn                | calmin                                                            | 0.019     | 9.9176616                                      |
| 1457495_at            | 2900052N01Rik       | RIKEN cDNA 2900052N01 gene                                        | 0.0214    | 9.781122222                                    |
| 1457373_at            | Cdh19               | cadherin 19, type 2                                               | 0.0251    | 9.646462622                                    |
| 1459570_at            | Gpr143              | G-protein-coupled receptor 143                                    | 0.0232    | 9.382679594                                    |
| 1439668_at            | Gm11681             | predicted gene 11681                                              | 0.019     | 9.18958684                                     |
| 1456633_at            | Trpm3               | transient receptor potential cation channel, subfamily M, mem1    | 0.0236    | 9.126109727                                    |
| 1448397_at            | Gjb6                | gap junction protein, beta 6                                      | 0.0274    | 9.063071082                                    |
| 1429177_x_at          | Sox17               | SRY (sex determining region Y)-box 17                             | 0.0199    | 8.75434961                                     |
| 1416468_at            | Aldh1a1             | aldehyde dehydrogenase family 1, subfamily A1                     | 0.0251    | 8.633825892                                    |
| 1424854_at            | Hist1h4m///Hist1h4  | histone cluster 1, H4m///histone cluster 1, H4b///histone cluste  | 0.019     | 8                                              |
| 1451580_a_at          | Ttr                 | transthyretin                                                     | 0.019     | 8                                              |
| 1452318_a_at          | Hspa1b              | heat shock protein 1B                                             | 0.019     | 7.835362381                                    |
| 1459197_at            | Cntn1               | contactin 1                                                       | 0.0199    | 7.781239579                                    |
| 1437056_x_at          | Crispld2            | cysteine-rich secretory protein LCCL domain containing 2          | 0.019     | 7.781239579                                    |
| 1436698_x_at          | Tmem204             | transmembrane protein 204                                         | 0.019     | 7.727490631                                    |
| 1425506_at            | Mylk                | myosin, light polypeptide kinase                                  | 0.019     | 7.568461174                                    |
| 1419759_at            | Abcb1a              | ATP-binding cassette, sub-family B (MDR/TAP), member 1A           | 0.0199    | 7.464263932                                    |
| 1417574_at            | Cxcl12              | chemokine (C-X-C motif) ligand 12                                 | 0.0246    | 7.412704495                                    |
| 1445565_at            | Hist1h2bg///Hist1h2 | histone cluster 1, H2bg///histone cluster 1, H2be///histone clus  | 0.019     | 7.160200567                                    |
| 1435741_at            | Pde8b               | phosphodiesterase 8B                                              | 0.019     | 7.160200567                                    |
| 1424553_at            | Hhat1               | hedgehog acyltransferase-like                                     | 0.019     | 7.110741449                                    |
| 1445961_at            | cDNA5               | H3101D08-3 NIA Mouse 15K cDNA Clone Set Mus musculus cDN          | 0.019     | 7.110741449                                    |
| 1460259_s_at          | Clca3a2///Clca3a1   | chloride channel accessory 3A2///chloride channel accessory 3     | 0.0199    | 7.012845771                                    |
| 1422155_at            | Hist2h3b///Hist1h3c | histone cluster 2, H3b///histone cluster 1, H3e///histone cluster | 0.019     | 6.91629785                                     |
| 1436386_x_at          | Zfp982              | zinc finger protein 982                                           | 0.03      | 6.821079134                                    |
| 1428387_at            | Acsl3               | acyl-CoA synthetase long-chain family member 3                    | 0.019     | 6.773962499                                    |
| 1427126_at            | Hspa1b              | heat shock protein 1B                                             | 0.019     | 6.727171322                                    |
| 1436367_at            | Ptprb               | protein tyrosine phosphatase, receptor type, B                    | 0.0203    | 6.680703355                                    |
| 1454969_at            | Lypd6               | LY6/PLAUR domain containing 6                                     | 0.019     | 6.634556367                                    |
| 1437264_at            | BC051142            | cDNA sequence BC051142                                            | 0.019     | 6.453134074                                    |
| 1458379_at            | 9330159F19Rik       | RIKEN cDNA 9330159F19 gene                                        | 0.027     | 6.453134074                                    |
| 1452385_at            | Usp53               | ubiquitin specific peptidase 53                                   | 0.019     | 6.408559021                                    |
| 1416239_at            | Gm5424///Ass1       | argininosuccinate synthase pseudogene///argininosuccinate syr     | 0.0267    | 6.276672783                                    |
| 1428394_at            | Lrrc8a///Phyhd1     | leucine rich repeat containing 8A///phytanoyl-CoA dioxygenas      | 0.019     | 6.233316637                                    |
| 1455452_x_at          | Kctd14              | potassium channel tetramerisation domain containing 14            | 0.0359    | 6.105036836                                    |
| 1459223_at            | B930095G15Rik       | RIKEN cDNA B930095G15 gene                                        | 0.0214    | 6.105036836                                    |
| 1434628_a_at          | Rhpn2               | rhophilin, Rho GTPase binding protein 2                           | 0.019     | 6.062866266                                    |
| 1419383_at            | S100b               | S100 protein, beta polypeptide, neural                            | 0.0201    | 6.02098699                                     |
| 1425537_at            | Ppm1a               | protein phosphatase 1A, magnesium dependent, alpha isoform        | 0.019     | 5.979396995                                    |
| 1460043_at            | cDNA2               | BB357628 RIKEN full-length enriched, adult male corpus striatum 1 | 0.0251    | 5.897076869                                    |
| 1439096_at            | Ddo                 | D-aspartate oxidase                                               | 0.0221    | 5.856342784                                    |
| 1418788_at            | Tek                 | endothelial-specific receptor tyrosine kinase                     | 0.0191    | 5.856342784                                    |
| 1436569_at            | Prex2               | phosphatidylinositol-3,4,5-trisphosphate-dependent Rac excha      | 0.0229    | 5.856342784                                    |
| 1424842_a_at          | Arhgap24            | Rho GTPase activating protein 24                                  | 0.0191    | 5.815890069                                    |
| 1459849_x_at          | Vcpip1              | valosin containing protein (p97)/p47 complex interacting prote    | 0.019     | 5.815890069                                    |
| 1439830_at            | Map3k5              | mitogen-activated protein kinase kinase kinase 5                  | 0.0232    | 5.775716782                                    |
| 1425811_a_at          | Csrp1               | cysteine and glycine-rich protein 1                               | 0.0262    | 5.735820992                                    |

|              |               |                                                            |        |             |
|--------------|---------------|------------------------------------------------------------|--------|-------------|
| 1449102_at   | Ebf2          | early B cell factor 2                                      | 0.0277 | 5.656854249 |
| 1416069_at   | Pfkip         | phosphofructokinase, platelet                              | 0.0191 | 5.656854249 |
| 1435640_x_at | A130040M12Rik | RIKEN cDNA A130040M12 gene                                 | 0.0881 | 5.656854249 |
| 1423523_at   | Aass          | aminoadipate-semialdehyde synthase                         | 0.027  | 5.578974665 |
| 1436173_at   | Dlc1          | deleted in liver cancer 1                                  | 0.0236 | 5.578974665 |
| 1439655_at   | cDNA3         | H3018G09-3 NIA Mouse 15K cDNA Clone Set Mus musculus cDN   | 0.0231 | 5.578974665 |
| 1434354_at   | Maob          | monoamine oxidase B                                        | 0.0199 | 5.464161027 |
| 1435361_at   | Sema3g        | sema domain, immunoglobulin domain (Ig), short basic domai | 0.019  | 5.464161027 |
| 1416164_at   | Fbln5         | fibulin 5                                                  | 0.0237 | 5.42641731  |
| 1416200_at   | Il33          | interleukin 33                                             | 0.0251 | 5.388934307 |
| 1448961_at   | Plscr2        | phospholipid scramblase 2                                  | 0.0464 | 5.388934307 |
| 1450653_at   | Spz1          | spermatogenic leucine zipper 1                             | 0.0191 | 5.388934307 |
| 1437277_x_at | Tgm2          | transglutaminase 2, C polypeptide                          | 0.0204 | 5.388934307 |
| 1438287_x_at | Ddx39         | DEAD (Asp-Glu-Ala-Asp) box polypeptide 39                  | 0.0878 | 5.351710219 |
| 1455799_at   | Rorb          | RAR-related orphan receptor beta                           | 0.0191 | 5.314743256 |
| 1438980_x_at | Pm20d1        | peptidase M20 domain containing 1                          | 0.024  | 5.278031643 |
| 1416003_at   | Cldn11        | claudin 11                                                 | 0.025  | 5.241573615 |
| 1447854_s_at | Hist2h2be     | histone cluster 2, H2be                                    | 0.0199 | 5.241573615 |

### Downregulated genes

|              |                |                                                                 |        |              |
|--------------|----------------|-----------------------------------------------------------------|--------|--------------|
| 1451246_s_at | Aurkb          | aurora kinase B                                                 | 0.019  | -51.26847217 |
| 1454694_a_at | Top2a          | topoisomerase (DNA) II alpha                                    | 0.019  | -24.42014734 |
| 1439904_at   | Fstl5          | follicle-stimulating-like 5                                     | 0.019  | -20.39297004 |
| 1448314_at   | Cdk1           | cyclin-dependent kinase 1                                       | 0.019  | -16.1112888  |
| 1448627_s_at | Pbk            | PDZ binding kinase                                              | 0.019  | -15.24220797 |
| 1434819_at   | St6gal2        | beta galactoside alpha 2,6 sialyltransferase 2                  | 0.019  | -14.32040113 |
| 1436847_s_at | Cdca8          | cell division cycle associated 8                                | 0.019  | -14.2214829  |
| 1416558_at   | Melk           | maternal embryonic leucine zipper kinase                        | 0.019  | -13.8325957  |
| 1426817_at   | Mki67          | antigen identified by monoclonal antibody Ki 67                 | 0.019  | -12.81711804 |
| 1423775_s_at | Prc1           | protein regulator of cytokinesis 1                              | 0.019  | -11.79415374 |
| 1420994_at   | B3gnt5         | UDP-GlcNAc:betaGal beta-1,3-N-acetylglucosaminyltransfer        | 0.019  | -11.79415374 |
| 1419153_at   | 2810417H13Rik  | RIKEN cDNA 2810417H13 gene                                      | 0.019  | -11.15794933 |
| 1428304_at   | Esco2          | establishment of sister chromatid cohesion N-acetyltransferase  | 0.0277 | -10.48314723 |
| 1436013_at   | Gsg1l          | GSG1-like                                                       | 0.019  | -10.48314723 |
| 1417458_s_at | Cks2           | CDC28 protein kinase regulatory subunit 2                       | 0.019  | -10.056107   |
| 1417910_at   | Ccna2          | cyclin A2                                                       | 0.019  | -9.9176616   |
| 1447363_s_at | Bub1b          | BUB1B, mitotic checkpoint serine/threonine kinase               | 0.019  | -9.781122222 |
| 1429295_s_at | Trip13         | thyroid hormone receptor interactor 13                          | 0.019  | -9.781122222 |
| 1430000_at   | B230117O15Rik  | RIKEN cDNA B230117O15 gene                                      | 0.0506 | -9.579829637 |
| 1452954_at   | Ube2c          | ubiquitin-conjugating enzyme E2C                                | 0.019  | -9.579829637 |
| 1416251_at   | Mcm6           | minichromosome maintenance complex component 6                  | 0.019  | -9.382679594 |
| 1438262_at   | Slc8a2         | solute carrier family 8 (sodium/calcium exchanger), member 2    | 0.019  | -9.000467878 |
| 1436808_x_at | Mcm5           | minichromosome maintenance complex component 5                  | 0.019  | -8.815240927 |
| 1456231_at   | Pla2g3         | phospholipase A2, group III                                     | 0.0227 | -8.339726087 |
| 1460627_at   | Thsd7b         | thrombospondin, type I, domain containing 7B                    | 0.019  | -8.168097006 |
| 1423146_at   | Hes5           | hairy and enhancer of split 5 (Drosophila)                      | 0.019  | -8.111675838 |
| 1454613_at   | Dpysl3         | dihydropyrimidinase-like 3                                      | 0.019  | -8           |
| 1416410_at   | Pafah1b3       | platelet-activating factor acetylhydrolase, isoform 1b, subunit | 0.019  | -8           |
| 1448205_at   | Gm5593///Ccnb1 | predicted gene 5593///cyclin B1                                 | 0.019  | -8           |
| 1424278_a_at | Birc5          | baculoviral IAP repeat-containing 5                             | 0.0214 | -7.835362381 |
| 1438852_x_at | Mcm6           | minichromosome maintenance complex component 6                  | 0.019  | -7.727490631 |
| 1450842_a_at | Cenpa          | centromere protein A                                            | 0.019  | -7.621103984 |
| 1422134_at   | Fosb           | FBJ osteosarcoma oncogene B                                     | 0.019  | -7.621103984 |
| 1418334_at   | Dbf4           | DBF4 zinc finger                                                | 0.019  | -7.568461174 |
| 1456344_at   | Tnc            | tenascin C                                                      | 0.0274 | -7.568461174 |
| 1424764_at   | Sez6l          | seizure related 6 homolog like                                  | 0.019  | -7.516181994 |
| 1435963_at   | Sema5b         | sema domain, seven thrombospondin repeats (type 1 and type      | 0.0199 | -7.516181994 |
| 1441536_at   | Hmgcs1         | 3-hydroxy-3-methylglutaryl-Coenzyme A synthase 1                | 0.0267 | -7.464263932 |
| 1436907_at   | Nav1           | neuron navigator 1                                              | 0.019  | -7.412704495 |
| 1452242_at   | Cep55          | centrosomal protein 55                                          | 0.019  | -7.361501205 |
| 1424046_at   | Bub1           | BUB1, mitotic checkpoint serine/threonine kinase                | 0.019  | -7.160200567 |
| 1416266_at   | Pdyn           | prodynorphin                                                    | 0.0263 | -7.160200567 |
| 1456354_at   | Chrna4         | cholinergic receptor, nicotinic, alpha polypeptide 4            | 0.0203 | -7.110741449 |
| 1435338_at   | Cdk6           | cyclin-dependent kinase 6                                       | 0.022  | -7.06162397  |
| 1456509_at   | 1110032F04Rik  | RIKEN cDNA 1110032F04 gene                                      | 0.019  | -7.06162397  |
| 1436392_s_at | Tfap2c         | transcription factor AP-2, gamma                                | 0.019  | -7.06162397  |
| 1416050_a_at | Scarbl         | scavenger receptor class B, member 1                            | 0.019  | -7.012845771 |



|              |                                                                                    |        |              |
|--------------|------------------------------------------------------------------------------------|--------|--------------|
| 1438009_at   | Hist1h2ao//Hist1h2 histone cluster 1, H2ao//histone cluster 1, H2ai//histone clust | 0.019  | -6.964404506 |
| 1451128_s_at | Kif22 kinesin family member 22                                                     | 0.019  | -6.964404506 |
| 1421546_a_at | Racgap1 Rac GTPase-activating protein 1                                            | 0.019  | -6.964404506 |
| 1415810_at   | Uhrf1 ubiquitin-like, containing PHD and RING finger domains, 1                    | 0.019  | -6.964404506 |
| 1435627_x_at | Marcks1 MARCKS-like 1                                                              | 0.019  | -6.91629785  |
| 1433935_at   | AU020206 expressed sequence AU020206                                               | 0.019  | -6.868523492 |
| 1429171_a_at | Ncapg non-SMC condensin I complex, subunit G                                       | 0.019  | -6.868523492 |
| 1449171_at   | Ttk Ttk protein kinase                                                             | 0.0199 | -6.821079134 |
| 1418666_at   | Ptx3 pentraxin related gene                                                        | 0.019  | -6.680703355 |
| 1416505_at   | Nr4a1 nuclear receptor subfamily 4, group A, member 1                              | 0.019  | -6.634556367 |
| 1455622_at   | Podxl2 podocalyxin-like 2                                                          | 0.0253 | -6.543216468 |
| 1448194_a_at | Mir675//H19 microRNA 675//H19, imprinted maternally expressed transcri             | 0.019  | -6.453134074 |
| 1434400_at   | Tgif2 TGFB-induced factor homeobox 2                                               | 0.019  | -6.453134074 |
| 1419513_a_at | Ect2 ect2 oncogene                                                                 | 0.019  | -6.408559021 |
| 1417395_at   | Klf4 Kruppel-like factor 4 (gut)                                                   | 0.0211 | -6.408559021 |
| 1450920_at   | Ccnb2 cyclin B2                                                                    | 0.0227 | -6.36429187  |
| 1416514_a_at | Fscn1 fascin actin-bundling protein 1                                              | 0.019  | -6.36429187  |
| 1452519_a_at | Zfp36 zinc finger protein 36                                                       | 0.019  | -6.276672783 |
| 1448777_at   | Mcm2 minichromosome maintenance complex component 2                                | 0.019  | -6.233316637 |
| 1435306_a_at | Kif11 kinesin family member 11                                                     | 0.0192 | -6.062866266 |
| 1434767_at   | Mis18bp1 MIS18 binding protein 1                                                   | 0.019  | -6.062866266 |
| 1441491_at   | A330068G13Rik RIKEN cDNA A330068G13 gene                                           | 0.0274 | -6.062866266 |
| 1460608_at   | Cacna1b calcium channel, voltage-dependent, N type, alpha 1B subunit               | 0.035  | -5.979396995 |
| 1441693_at   | Adamts3 a disintegrin-like and metallopeptidase (reprolysin type) with t           | 0.019  | -5.938094283 |
| 1455899_x_at | Socs3 suppressor of cytokine signaling 3                                           | 0.019  | -5.938094283 |
| 1459403_at   | Ldlr low density lipoprotein receptor                                              | 0.0222 | -5.897076869 |
| 1434115_at   | Cdh13 cadherin 13                                                                  | 0.0221 | -5.856342784 |
| 1416442_at   | Ier2 immediate early response 2                                                    | 0.019  | -5.856342784 |
| 1424118_a_at | Spe25 SPC25, NDC80 kinetochore complex component, homolog (S,                      | 0.0191 | -5.735820992 |
| 1449581_at   | Emid1 EMI domain containing 1                                                      | 0.0199 | -5.696200782 |
| 1436718_at   | Nxph1 neurexophilin 1                                                              | 0.019  | -5.696200782 |
| 1427256_at   | Vcan versican                                                                      | 0.0214 | -5.617779503 |
| 1442280_at   | Knstrn kinetochore-localized astrin/SPAG5 binding                                  | 0.024  | -5.578974665 |
| 1427161_at   | Cenpf centromere protein F                                                         | 0.019  | -5.540437872 |
| 1459627_at   | Msmo1 methylsterol monooxygenase 1                                                 | 0.0391 | -5.540437872 |
| 1441983_at   | cDNA4 UI-M-BH3-aqt-d-10-0-UI.s1 NIH_BMAP_M_S4 Mus musculus cDl                     | 0.0246 | -5.502167273 |
| 1454700_at   | Lrfr4 leucine rich repeat and fibronectin type III domain containing 4             | 0.0199 | -5.464161027 |
| 1416299_at   | Shcbl1 Shc SH2-domain binding protein 1                                            | 0.0199 | -5.464161027 |
| 1456158_at   | Draxin dorsal inhibitory axon guidance protein                                     | 0.0259 | -5.42641731  |
| 1416028_a_at | Hn1 hematological and neurological expressed sequence 1                            | 0.019  | -5.42641731  |
| 1417822_at   | D17H6S56E-5 DNA segment, Chr 17, human D6S56E 5                                    | 0.0191 | -5.351710219 |
| 1455272_at   | Grm5 glutamate receptor, metabotropic 5                                            | 0.0199 | -5.351710219 |
| 1419156_at   | Sox4 SRY (sex determining region Y)-box 4                                          | 0.0199 | -5.351710219 |
| 1452092_at   | Chst15 carbohydrate (N-acetylgalactosamine 4-sulfate 6-O) sulfotrans               | 0.0232 | -5.314743256 |
| 1428105_at   | Tpx2 TPX2, microtubule-associated                                                  | 0.025  | -5.205367422 |
| 1452534_a_at | Hmgb2 high mobility group box 2                                                    | 0.0222 | -5.169411323 |

### Extended Table 1. Genes statistically enriched and down-regulated in developing astrocytes.

The differentially expressed genes in mature astrocytes (P30) compared to immature astrocytes (P7) are listed along with their fold-change enrichment and the Affymetrix probe set ID (Cahoy et al., 2008). All genes are statistically different by Geo2R analysis with an adjusted P-value (Benjamini and Hochberg, 1995 FDR) threshold <5%. There are 93 and 82 immature and mature astrocyte-enriched genes, respectively, selected with a 5-fold change criteria.

| GOID                       | TERM                   | CORRECTED_PVALUE | NUM_LIST_ANNOTATIONS | LIST_SIZE | TOTAL_NUM_ANNOTATIONS | POPULATION_SIZE | ANNOTATED_GENES                                                                                                                                                                                                                                                                 |
|----------------------------|------------------------|------------------|----------------------|-----------|-----------------------|-----------------|---------------------------------------------------------------------------------------------------------------------------------------------------------------------------------------------------------------------------------------------------------------------------------|
| <b>Upregulated genes</b>   |                        |                  |                      |           |                       |                 |                                                                                                                                                                                                                                                                                 |
| GO:0030054                 | cell junction          | 0.0067           | 13                   | 73        | 1210                  | 24808           | CDH19,LYPD6,ARHGAP2,MYLK,GJB6,CLDN11,USP53,DLC1, TMEM204,LGH1,FAM107A,ABCB1a,TEK                                                                                                                                                                                                |
| GO:0015629                 | actin cytoskeleton     | 0.0168           | 8                    | 73        | 505                   | 24808           | MOBP,FLT1,FAM107A,CSR1,MYLK,GJB6,DLC1,TEK                                                                                                                                                                                                                                       |
| GO:0043209                 | myelin sheath          | 0.0056           | 6                    | 73        | 213                   | 24808           | MOBP,MYOC, MBP, ASS1, CLDN11, CNTN1                                                                                                                                                                                                                                             |
| GO:0019867                 | outer membrane         | 0.0416           | 5                    | 73        | 197                   | 24808           | MYOC, CLMN, ASS1, MAOB, ACSL3                                                                                                                                                                                                                                                   |
| <b>Downregulated genes</b> |                        |                  |                      |           |                       |                 |                                                                                                                                                                                                                                                                                 |
| GO:000278                  | mitotic cell cycle     | 1.7935e-21       | 32                   | 90        | 833                   | 24808           | BUB1B, CENPF, CEP55, CKS2, TOP2A, MCM6, KNSTRN, UBE2C, MCM2, MKI67, SPC25, TRIP13, DBF4, CENPA, CCNB1, PRC1, KIF22, CCNA2, KLF4, CDK1, KIF11, CCNB2, PBK, ECT2, BIRC5, SOX4, NCAPG, AURKB, CDCA8, TPX2, BUB1, RACGAP1                                                           |
| GO:0007049                 | cell cycle             | 2.7605e-19       | 39                   | 90        | 1673                  | 24808           | BUB1B, CENPF, CEP55, CKS2, TOP2A, MCM6, KNSTRN, UBE2C, NR4A1, MCM2, MIS18BP1, MKI67, SPC25, TRIP13, DBF4, CENPA, CCNB1, PRC1, MCM5, ESCO2, KIF22, CCNA2, MELK, UHRF1, KLF4, CDK1, KIF11, CCNB2, PBK, ECT2, BIRC5, SOX4, NCAPG, AURKB, CDCA8, TPX2, BUB1, RACGAP1, 2810417H13Rik |
| GO:0007059                 | chromosome segregation | 8.6449e-15       | 19                   | 90        | 327                   | 24808           | BUB1B, CENPF, ESCO2, KIF22, TOP2A, KNSTRN, UBE2C, MKI67, SPC25, TRIP13, ECT2, BIRC5, CCNB1, NCAPG, AURKB, CDCA8, BUB1, RACGAP1, PRC1                                                                                                                                            |
| GO:0051301                 | cell division          | 1.7635e-13       | 22                   | 90        | 588                   | 24808           | BUB1B, CEP55, CKS2, CCNA2, TOP2A, KNSTRN, CDK1, KIF11, UBE2C, MIS18BP1, SPC25, CCNB2, ECT2, CENPA, BIRC5, CCNB1, AURKB, CDCA8, TPX2, BUB1, PRC1, RACGAP1                                                                                                                        |
| GO:000280                  | nuclear division       | 9.5614e-13       | 19                   | 90        | 422                   | 24808           | BUB1B, CKS2, KIF22, TOP2A, KNSTRN, KIF11, UBE2C, MKI67, TRIP13, CCNB2, BIRC5, CCNB1, NCAPG, AURKB, CDCA8, TPX2, BUB1, PRC1, RACGAP1                                                                                                                                             |

Abbreviations:

NUM\_LIST\_ANNOTATIONS: number of genes from the input list that match the annotation

LIST\_SIZE: number of genes in the input list

TOTAL\_NUM\_ANNOTATIONS: number of genes from the mouse genome that match the annotation

POPULATION\_SIZE: number of genes in the mouse genome

**Extended Table 2. GO Term Finder analysis of genes upregulated and downregulated in mature vs immature astrocytes.** Selected lists of differentially expressed genes (93 down- and 82 up-regulated genes) were analyzed for GO terms selecting “process” for immature associated genes and “component” for mature ones. Whereas immature astrocytes are characterized by intensive cell division, mature astrocytes present enrichment in genes involved in cell junction.

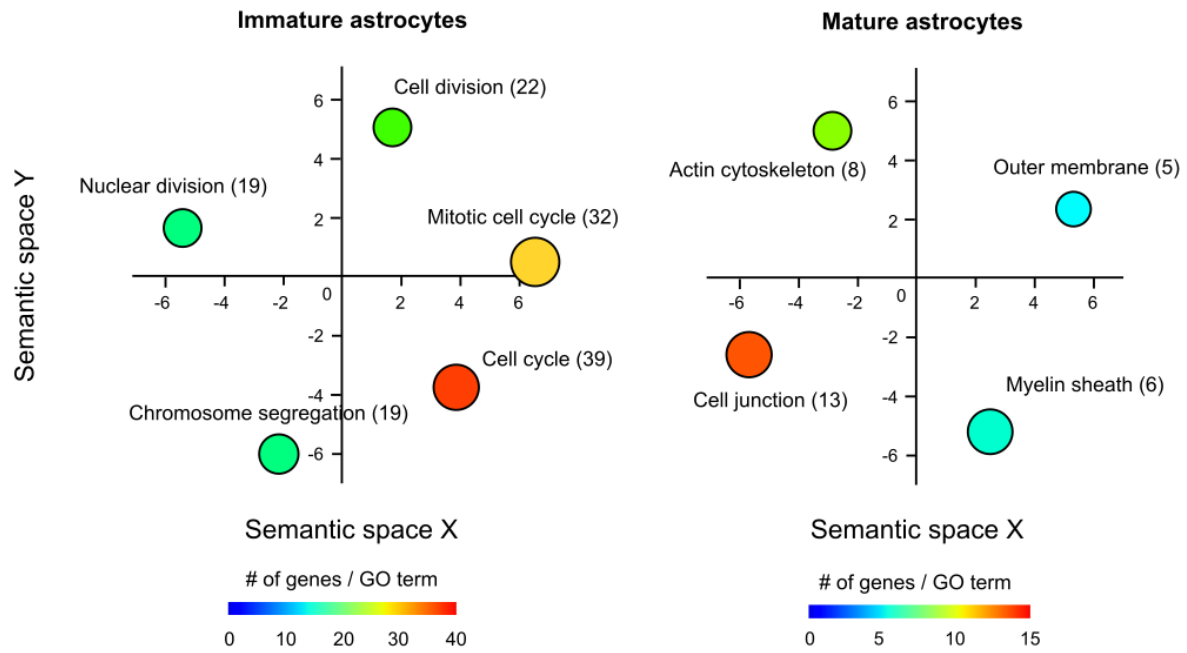

**Extended Figure 1. Semantic similarity-based scatterplots of GO terms.** GO terms (Extended Data Table 2) identified through the analysis of down or up-regulated genes (Extended Data Table 1) respectively associated to immature (P7) and mature (P30) astrocytes and visualized according to the similarity of the GO terms along arbitrary X and Y axis. Each circle is color-coded according to the frequency of the GO term in the EBI GOA reference database, and the number of genes per GO term is indicated in parenthesis. Circle size indicates the P-value (circles with bigger size have smaller P value) (Extended Table 2).

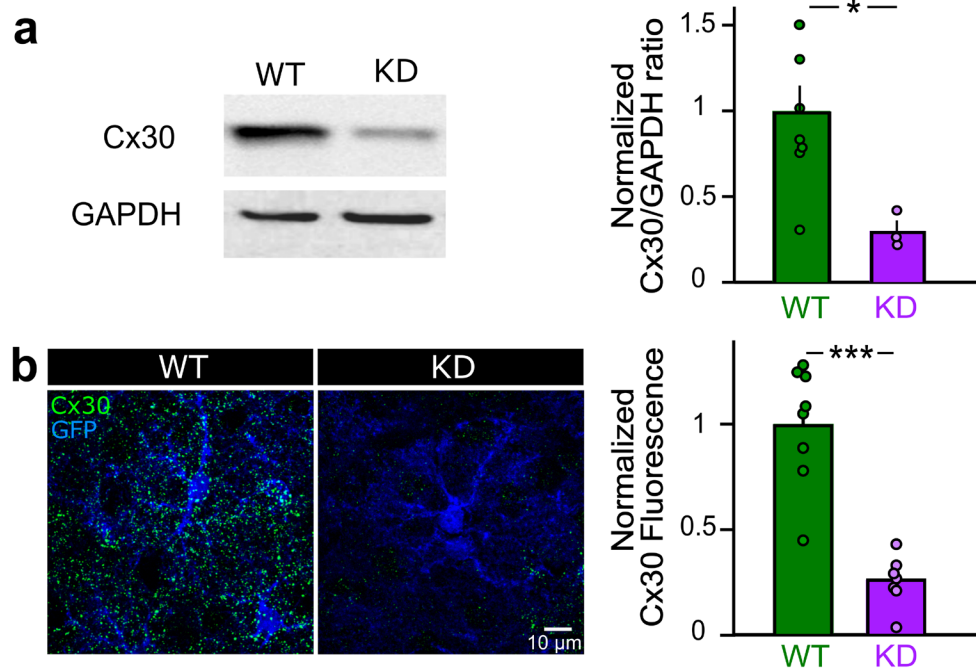

**Extended Figure 2. Characterization of Cx30 KD mice.** (a) Western blot analysis from visual cortex shows a decrease of 70% in Cx30 expression in KD mice (n=3) compared to WT mice (n=8, P=0.0242, U=1, Mann-Whitney test). (b) Immunostaining of Cx30 in the visual cortex also shows a 70% decrease in Cx30 expression in astrocytes in KD mice (n=7 samples from 3 mice) compared to WT mice (n=8 samples from 3 mice, P=0.0003, U=0, Mann-Whitney test).

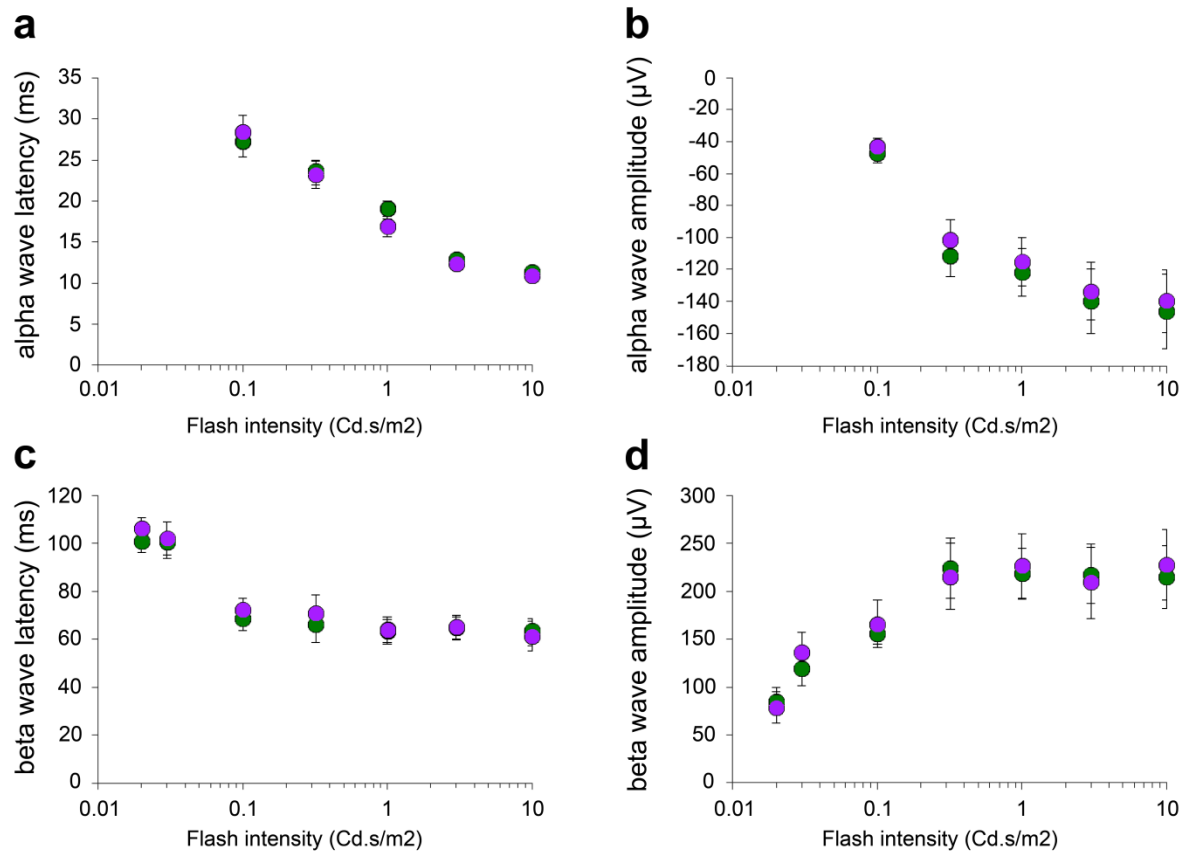

**Extended Figure 3. Retinal activation is unchanged in KD mice.** The changes in potentials induced by light flashes of increasing intensity (from 0.02 to 10 Cd.s/m<sup>2</sup>) in the retinal tissue was assessed by recording alpha- and beta-wave latency and amplitude. No difference in electroretinograms were detected between WT (n=6) and KD mice (n=6, alpha wave latency: P=0.5550, DF=50, F(1,50)=0.3531; alpha wave amplitude: P=0.6231, DF=50, F(1,50)=0.2446; beta wave latency: P=0.5278, DF=71, F(1,71)=0.4027; beta wave amplitude: P=0.8016, DF=70, F(1,70)=0.06365; 2-way ANOVA).

| 146/2164 | Gene & Synonyms              | WFA WT /KD |         |              |             | Total | MW  | Description | Species                               |                                                                                                      |              |
|----------|------------------------------|------------|---------|--------------|-------------|-------|-----|-------------|---------------------------------------|------------------------------------------------------------------------------------------------------|--------------|
|          |                              | Ratio      | Log2    | Adj. p-value | CV %        |       |     |             |                                       |                                                                                                      |              |
| P61759   | Vbp1,Pfn3                    | 1000.00    | 1000.00 |              |             | 1     | 4   | 22.4        | Prefoldin subunit 3                   | Mus musculus                                                                                         |              |
| Q8CE50   | Naa30,Mak3,Nat12             | 1000.00    | 1000.00 |              |             | 1     | 3   | 39.4        | N-alpha-acetyltransferase 30          | Mus musculus                                                                                         |              |
| Q9EOG3   | Scel                         | 809.52     | 9.66    |              |             | 1     | 4   | 73.0        | Scellin                               | Mus musculus                                                                                         |              |
| O35551   | Rabep1,RabSep,Rabpt5,Rabpt5a | 134.15     | 7.07    |              |             | 1     | 3   | 99.5        | Rab GTPase-binding effector protein 1 | Mus musculus                                                                                         |              |
| O54988   | Slk,Kiaa0204,Slk2            | 3.20       | 1.68    | 2.39E-06     | 15.59530284 | 11    | 67  | 69          | 141.5                                 | Slk20-like serine/threonine-protein kinase                                                           | Mus musculus |
| Q8QX20   | Shk1,Shk                     | 2.90       | 1.54    | 0.006079     | 0.075393677 | 1     | 5   | 5           | 45.7                                  | Serine/threonine-protein kinase SBK1                                                                 | Mus musculus |
| Q8CI19   | Mical3,Kiaa0819,Kiaa1364     | 2.85       | 1.51    | 0.004016     | 21.25373328 | 5     | 26  | 30          | 223.7                                 | [F-actin]-monooxygenase MICAL3                                                                       | Mus musculus |
| P68404   | Prkch,Prkch,Prkcb1           | 2.66       | 1.41    | 0.002285     | 17.64812435 | 4     | 18  | 19          | 76.8                                  | Protein kinase C beta type                                                                           | Mus musculus |
| P26516   | Psm27,Mov-34,Mov34           | 2.56       | 1.36    | 2.9E-05      | 13.76946143 | 4     | 27  | 31          | 36.5                                  | 26S proteasome non-ATPase regulatory subunit 7                                                       | Mus musculus |
| Q8K319   | Glecl1,Gig18,Tssn1           | 2.51       | 1.33    | 0.026854     | 19.02016517 | 2     | 11  | 17          | 57.5                                  | Glucocorticoid-induced transcript 1 protein                                                          | Mus musculus |
| P54254   | Atxn1,Scal1                  | 2.48       | 1.31    | 2.27E-05     | 14.31049909 | 6     | 30  | 32          | 83.8                                  | Ataxin-1                                                                                             | Mus musculus |
| Q761L6   | Fhod3,Fhod2,Kiaa1695         | 2.32       | 1.21    | 0.013662     | 12.80855473 | 2     | 9   | 11          | 175.7                                 | FH1/FH2 domain-containing protein 3                                                                  | Mus musculus |
| O88738   | Brcf6,Kiaa1289               | 2.25       | 1.17    | 0.010948     | 20.16502341 | 3     | 14  | 15          | 532.2                                 | Baculoviral IAP repeat-containing protein 6                                                          | Mus musculus |
| Q62446   | Fkbp3,Fkbp25                 | 2.20       | 1.14    | 0.000199     | 20.34046107 | 10    | 75  | 76          | 25.1                                  | Peptidyl-prolyl cis-trans isomerase FKBP3                                                            | Mus musculus |
| P52480   | Pkm,Pk3,Pkm2,Pykm            | 2.17       | 1.12    | 2.81E-11     | 9.468352062 | 7     | 55  | 57          | 57.8                                  | Pyruvate kinase PKM                                                                                  | Mus musculus |
| Q80X13   | Eif4g3                       | 2.16       | 1.11    | 1.09E-15     | 7.882255709 | 10    | 77  | 88          | 174.9                                 | Eukaryotic translation initiation factor 4 gamma 3                                                   | Mus musculus |
| A2AN08   | Ubr4,Kiaa0462,Zubr1          | 2.13       | 1.09    | 0.001063     | 20.53598837 | 7     | 36  | 39          | 572.3                                 | E3 ubiquitin-protein ligase UBR4                                                                     | Mus musculus |
| Q3UJ38   | Fchs2d,Kiaa0769,Sh3md3       | 2.10       | 1.07    | 0.000678     | 19.11699652 | 4     | 30  | 30          | 84.3                                  | F-BAR and double SH3 domains protein 2                                                               | Mus musculus |
| P48678   | Lmma,Lmm1                    | 2.09       | 1.06    | 0.013662     | 23.00733647 | 3     | 17  | 21          | 74.2                                  | Prelamin-A/C                                                                                         | Mus musculus |
| Q811P8   | Arhgap32,Grit,Kiaa0712,Rics  | 2.05       | 1.03    | 7.19E-12     | 9.132445507 | 10    | 60  | 71          | 229.7                                 | Rho GTPase-activating protein 32                                                                     | Mus musculus |
| Q3THK3   | Gnt2l1                       | 2.00       | 1.00    | 0.007011     | 18.28659847 | 3     | 14  | 18          | 57.2                                  | General transcription factor IIIF subunit 1                                                          | Mus musculus |
| EQ0557   | Dsp                          | 1.99       | 0.99    | 0.00028      | 21.04795421 | 12    | 79  | 79          | 332.9                                 | Desmoplakin                                                                                          | Mus musculus |
| Q8JZQ9   | Eif3b,Eif3s9                 | 1.98       | 0.99    | 0.01836      | 20.99918586 | 1     | 12  | 12          | 91.4                                  | Eukaryotic translation initiation factor 3 subunit B                                                 | Mus musculus |
| O55143   | Atp2a2                       | 1.98       | 0.98    | 0.008788     | 25.3912108  | 5     | 29  | 34          | 114.9                                 | Sarcoplasmic/endoplasmic reticulum calcium ATPase 2                                                  | Mus musculus |
| Q62318   | Trim28,Krip1,Tif1b           | 1.96       | 0.97    | 7.79E-08     | 13.18544934 | 8     | 62  | 64          | 88.8                                  | Transcription intermediary factor 1-beta                                                             | Mus musculus |
| Q3UH66   | Wnk2,Kiaa1760                | 1.96       | 0.97    | 0.003006     | 20.4282488  | 4     | 22  | 23          | 227.5                                 | Serine/threonine-protein kinase WNK2                                                                 | Mus musculus |
| O08586   | Plen,Mmac1                   | 1.92       | 0.94    | 0.042364     | 27.63248399 | 2     | 15  | 16          | 47.2                                  | Phosphatidylinositol 3,4,5-trisphosphate 3-phosphatase and dual-specificity protein phosphatase PTEN | Mus musculus |
| O35385   | Pnrf2                        | 1.91       | 0.94    | 0.001789     | 12.79143067 | 1     | 12  | 12          | 86.6                                  | Serine/threonine-protein phosphatase with EF-hands 2                                                 | Mus musculus |
| Q6DFZ1   | Gbf1                         | 1.91       | 0.94    | 5.33E-09     | 10.07331619 | 6     | 42  | 42          | 206.8                                 | Golgi-specific brefeldin A-resistance factor 1                                                       | Mus musculus |
| Q9QYR6   | Map1a,Mtap1,Mtap1a           | 1.91       | 0.93    | 1.08E-08     | 14.76681154 | 53    | 290 | 302         | 300.1                                 | Microtubule-associated protein 1A                                                                    | Mus musculus |
| O88447   | Klec1,Klec2                  | 1.91       | 0.93    | 6.56E-11     | 7.79711168  | 8     | 39  | 52          | 61.5                                  | Kinesin light chain 1                                                                                | Mus musculus |
| P33175   | Kif5a,Kiaa4086,Kif5,Nkch1    | 1.89       | 0.92    | 0.048086     | 26.18822758 | 2     | 12  | 12          | 117.0                                 | Kinesin heavy chain isoform 5A                                                                       | Mus musculus |
| Q9DB55   | Klec4,Klec8                  | 1.89       | 0.92    | 0.007071     | 18.34439877 | 2     | 14  | 17          | 68.6                                  | Kinesin light chain 4                                                                                | Mus musculus |
| Q8CDA1   | Inpp5f,Kiaa0966,Sac2         | 1.84       | 0.88    | 2.29E-08     | 11.95669286 | 8     | 55  | 66          | 127.6                                 | Phosphatidylinositol phosphatase SAC2                                                                | Mus musculus |
| P33173   | Kif1a,Atsv,Kif1              | 1.83       | 0.87    | 1.65E-05     | 14.82556407 | 5     | 35  | 40          | 191.7                                 | Kinesin-like protein KIF1A                                                                           | Mus musculus |
| Q3UYC0   | Ppm1h,Kiaa1157               | 1.80       | 0.85    | 2.11E-05     | 15.26105258 | 4     | 37  | 47          | 56.4                                  | Protein phosphatase 1H                                                                               | Mus musculus |
| Q8QJZ7   | Snx32,Snx6b                  | 1.79       | 0.84    | 0.003708     | 12.99945429 | 2     | 11  | 12          | 46.6                                  | Sorting nexin-32                                                                                     | Mus musculus |
| O35382   | Exoc4,Sec8,Sec8l1            | 1.79       | 0.84    | 0.032487     | 20.04872335 | 1     | 10  | 12          | 110.5                                 | Exocyst complex component 4                                                                          | Mus musculus |
| Q61768   | Kif5b,Khes,Kns1              | 1.75       | 0.81    | 2.2E-06      | 14.63427064 | 8     | 50  | 54          | 109.6                                 | Kinesin-1 heavy chain                                                                                | Mus musculus |
| P42859   | Htt,Hd,Hdh                   | 1.74       | 0.80    | 0.010867     | 25.76552188 | 5     | 27  | 29          | 344.7                                 | Huntingtin                                                                                           | Mus musculus |
| P54822   | Adsl,Adl                     | 1.74       | 0.80    | 0.024474     | 23.71478869 | 2     | 14  | 18          | 54.9                                  | Adenylosuccinate lyase                                                                               | Mus musculus |
| Q61879   | Myl10                        | 1.74       | 0.80    | 6.48E-27     | 5.896485627 | 20    | 122 | 146         | 229.0                                 | Myosin-10                                                                                            | Mus musculus |
| Q6PD10   | Ipk6l,Ipk1                   | 1.73       | 0.79    | 0.049286     | 14.9523868  | 2     | 8   | 8           | 49.3                                  | Inositol hexakisphosphate kinase 1                                                                   | Mus musculus |
| Q91WG7   | Dgkg,Dagk3                   | 1.73       | 0.79    | 0.020893     | 26.6598409  | 4     | 20  | 23          | 88.5                                  | Diacylglycerol kinase gamma                                                                          | Mus musculus |
| Q3USB7   | Plel1                        | 1.73       | 0.79    | 0.004272     | 24.04496638 | 7     | 36  | 38          | 122.7                                 | Inactive phospholipase C-like protein 1                                                              | Mus musculus |
| P52623   | Uck1,Umpk                    | 1.71       | 0.77    | 0.000174     | 16.60444341 | 3     | 28  | 28          | 31.1                                  | Uridine-cytidine kinase 1                                                                            | Mus musculus |
| Q8C194   | Pzyb                         | 1.70       | 0.77    | 0.01997      | 28.16517117 | 5     | 26  | 29          | 96.7                                  | Glycogen phosphorylase, brain form                                                                   | Mus musculus |
| F6SEU4   | Syngap1                      | 1.68       | 0.75    | 0.008479     | 26.43766935 | 5     | 38  | 40          | 148.2                                 | Ras/Rap GTPase-activating protein SynGAP                                                             | Mus musculus |
| QBMMF4   | Dlat                         | 1.67       | 0.74    | 1.67E-05     | 13.97343485 | 6     | 31  | 36          | 67.9                                  | Dihydropyridine-residue acetyltransferase component of pyruvate dehydrogenase complex, mitochondrial | Mus musculus |
| Q6P116   | Psd2                         | 1.67       | 0.74    | 0.015629     | 24.89529792 | 3     | 18  | 18          | 84.3                                  | PH and SEC7 domain-containing protein 2                                                              | Mus musculus |
| Q9DB27   | Mct1                         | 1.67       | 0.74    | 0.009234     | 23.78461434 | 3     | 21  | 23          | 20.6                                  | Malignant T-cell-amplified sequence 1                                                                | Mus musculus |
| Q7TOE7   | Amph,Amph1                   | 1.67       | 0.74    | 1.87E-14     | 8.819239129 | 13    | 86  | 102         | 75.0                                  | Amphiphysin                                                                                          | Mus musculus |
| Q8CGC7   | Eprs,Qprs                    | 1.66       | 0.73    | 3.49E-12     | 11.6193788  | 24    | 166 | 174         | 170.1                                 | Bifunctional glutamate/proline-tRNA ligase                                                           | Mus musculus |
| P70290   | Mnp1                         | 1.64       | 0.71    | 0.000675     | 18.54377691 | 4     | 28  | 30          | 52.2                                  | 55 kDa erythrocyte membrane protein                                                                  | Mus musculus |
| Q9DBU8   | Snx5                         | 1.63       | 0.71    | 1.34E-06     | 12.46985036 | 6     | 34  | 36          | 46.8                                  | Sorting nexin-5                                                                                      | Mus musculus |
| P28738   | Kif5c,Nkch2                  | 1.63       | 0.70    | 6.6E-06      | 16.75823116 | 11    | 77  | 90          | 109.3                                 | Kinesin heavy chain isoform 5C                                                                       | Mus musculus |
| Q80XQ2   | Tbcl1d5                      | 1.63       | 0.70    | 0.003155     | 21.57073782 | 5     | 26  | 27          | 91.8                                  | TBC1 domain family member 5                                                                          | Mus musculus |
| Q8VDN4   | Cede92,D5Bwg0834e            | 1.61       | 0.69    | 0.000675     | 21.33832429 | 6     | 52  | 57          | 35.2                                  | Coiled-coil domain-containing protein 92                                                             | Mus musculus |
| O08919   | Numbl,Nbl                    | 1.59       | 0.67    | 0.004506     | 23.54602998 | 2     | 30  | 30          | 64.1                                  | Numb-like protein                                                                                    | Mus musculus |
| Q9DBC3   | Cmt1r,Ftsjd2,Kiaa0082        | 1.57       | 0.65    | 0.007106     | 20.36903894 | 2     | 16  | 18          | 95.7                                  | Cap-specific mRNA (nucleoside-2'-O-)-methyltransferase 1                                             | Mus musculus |
| Q6NZL0   | Soga3                        | 1.57       | 0.65    | 0.008788     | 26.07925649 | 5     | 34  | 37          | 103.5                                 | Protein SOGA3                                                                                        | Mus musculus |
| Q9OQ79   | Txd9c9,Apacd                 | 1.56       | 0.64    | 0.004261     | 24.15682851 | 5     | 37  | 37          | 26.3                                  | Thioredoxin domain-containing protein 9                                                              | Mus musculus |
| Q62420   | Sh3g2,Sh3d2a                 | 1.56       | 0.64    | 3.38E-06     | 14.26796973 | 5     | 43  | 49          | 40.0                                  | Endophilin-A1                                                                                        | Mus musculus |
| Q8BG92   | Clvs2,Rhhp112                | 1.55       | 0.64    | 0.010697     | 23.37282327 | 2     | 18  | 18          | 38.0                                  | Clavesin-2                                                                                           | Mus musculus |
| Q8VHJ5   | Mark1,Emk3,Kiaa1477          | 1.55       | 0.64    | 0.023248     | 30.31749528 | 4     | 37  | 40          | 88.3                                  | Serine/threonine-protein kinase MARK1                                                                | Mus musculus |
| Q8CHC4   | Synj1,Kiaa0910               | 1.55       | 0.63    | 4.84E-12     | 12.10563611 | 31    | 224 | 230         | 172.6                                 | Synaptojanin-1                                                                                       | Mus musculus |
| Q8K394   | Ple12,Kiaa1092,Plec2         | 1.53       | 0.62    | 3.03E-05     | 16.47086309 | 7     | 44  | 58          | 125.8                                 | Inactive phospholipase C-like protein 2                                                              | Mus musculus |
| D3YZU1   | Shank1                       | 1.52       | 0.61    | 0.001217     | 21.54012545 | 8     | 41  | 44          | 226.3                                 | SH3 and multiple ankyrin repeat domains protein 1                                                    | Mus musculus |
| Q9ES97   | Rtn3                         | 1.52       | 0.60    | 0.004016     | 24.84622418 | 10    | 52  | 67          | 103.9                                 | Reticulon-3                                                                                          | Mus musculus |
| P51174   | Acadl                        | 0.66       | -0.59   | 6.6E-06      | 12.10153131 | 5     | 27  | 34          | 47.9                                  | Long-chain specific acyl-CoA dehydrogenase, mitochondrial                                            | Mus musculus |
| Q8BQ07   | Aars                         | 0.66       | -0.59   | 0.005213     | 26.15965795 | 10    | 61  | 69          | 106.9                                 | Alanine-tRNA ligase, cytoplasmic                                                                     | Mus musculus |
| P38647   | Hspa9,Grp75,Hsp74,Hspa9a     | 0.66       | -0.60   | 0.000686     | 21.28143564 | 8     | 50  | 56          | 73.5                                  | Stress-70 protein, mitochondrial                                                                     | Mus musculus |
| Q922Q4   | Pvc2                         | 0.66       | -0.60   | 0.024273     | 18.44134176 | 2     | 10  | 11          | 33.7                                  | Pyruvate-5-carboxylase reductase 2                                                                   | Mus musculus |
| Q62165   | Dag1,Dag-1                   | 0.65       | -0.61   | 0.002788     | 18.75329902 | 2     | 18  | 18          | 96.9                                  | Dystroglycan                                                                                         | Mus musculus |
| Q62188   | Dpysl3,Dpp3,Ulip             | 0.65       | -0.62   | 1.04E-06     | 13.51874369 | 5     | 44  | 47          | 61.9                                  | Dihydroxypyrimidinase-related protein 3                                                              | Mus musculus |
| Q920P5   | Aks5                         | 0.65       | -0.62   | 0.033937     | 32.88881184 | 8     | 49  | 56          | 63.3                                  | Adenylate kinase isoenzyme 5                                                                         | Mus musculus |
| Q7TN29   | Smap2,Smap11                 | 0.65       | -0.63   | 2.7E-05      | 15.37998954 | 4     | 34  | 35          | 46.6                                  | Stromal membrane-associated protein 2                                                                | Mus musculus |
| Q9DCW4   | Etb                          | 0.64       | -0.64   | 0.002068     | 23.40384061 | 6     | 48  | 48          | 27.6                                  | Electron transfer flavoprotein subunit beta                                                          | Mus musculus |
| Q9JKY5   | Hjip1r                       | 0.64       | -0.64   | 0.000462     | 20.73315839 | 10    | 55  | 69          | 119.4                                 | Huntingtin-interacting protein 1-related protein                                                     | Mus musculus |
| P21981   | Tgm2                         | 0.64       | -0.65   | 0.01069      | 21.10408291 | 2     | 15  | 17          | 77.1                                  | Protein-glutamine gamma-glutamyltransferase 2                                                        | Mus musculus |
| Q91V35   | Pqbp1,Npw38                  | 0.64       | -0.65   | 0.026627     | 5.719685746 | 1     | 6   | 6           | 30.6                                  | Polyglutamine-binding protein 1                                                                      | Mus musculus |
| Q8R001   | Manre2                       | 0.63       | -0.66   | 0.012228     | 28.64501901 | 10    | 51  | 60          | 36.9                                  | Microtubule-associated protein RP/EB family member 2                                                 | Mus musculus |
| O08585   | Clta                         | 0.63       | -0.67   | 2.68E-06     | 10.88919057 | 2     | 24  | 24          | 25.6                                  | Clathrin light chain A                                                                               | Mus musculus |
| Q9Z1P6   | Ndufa7                       | 0.63       | -0.67   | 0.003205     | 19.11087114 | 3     | 19  | 24          | 12.6                                  | NADH dehydrogenase [ubiquinone] 1 alpha subcomplex subunit 7                                         | Mus musculus |
| Q8K3H0   | App1,Dip13a,Kiaa1428         | 0.62       | -0.68   | 0.003607     | 17.06072203 | 2     | 15  | 18          | 79.3                                  | DCC-interacting protein 13-alpha                                                                     | Mus musculus |
| Q711X4   | Tln2                         | 0.62       | -0.68   | 0.000163     | 21.35196305 | 31    | 189 | 191         | 253.6                                 | Talin-2                                                                                              | Mus musculus |
| P97315   | Crsp1,Crp1,Crsp              | 0.62       | -0.68   | 1.14E-05     | 16.27098768 | 7     | 53  | 58          | 2                                     |                                                                                                      |              |

|               |                                |             |              |                 |                    |          |           |           |              |                                                                                  |                     |
|---------------|--------------------------------|-------------|--------------|-----------------|--------------------|----------|-----------|-----------|--------------|----------------------------------------------------------------------------------|---------------------|
| Q9DB20        | Atp5o.D12Wsu28e                | 0.56        | -0.83        | 7.24E-05        | 13.71695369        | 3        | 22        | 24        | 23.4         | ATP synthase subunit O, mitochondrial                                            | Mus musculus        |
| Q8CCT4        | Tceal5                         | 0.55        | -0.85        | 0.006079        | 14.63484766        | 3        | 12        | 13        | 22.0         | Transcription elongation factor A protein-like 5                                 | Mus musculus        |
| P35700        | Prdx1.Msp23.Paga.Tdpx2         | 0.55        | -0.85        | 0.025661        | 27.11931534        | 3        | 18        | 18        | 22.2         | Peroxiredoxin-1                                                                  | Mus musculus        |
| P41242        | Matk.Ctk.Ntk                   | 0.55        | -0.86        | 0.035669        | 20.56916551        | 2        | 10        | 11        | 56.1         | Megakaryocyte-associated tyrosine-protein kinase                                 | Mus musculus        |
| AA0N4SVRS     | Rasgef1a                       | 0.55        | -0.87        | 0.045892        | 7.871596314        | 1        | 6         | 6         | 56.9         | RasGEF domain family, member 1A                                                  | Mus musculus        |
| Q9D8S3        | Arfgap3                        | 0.54        | -0.88        | 1.61E-06        | 11.71431444        | 6        | 30        | 36        | 57.5         | ADP-ribosylation factor GTPase-activating protein 3                              | Mus musculus        |
| Q9JJC6        | Rllpl1.MNcb-2440               | 0.54        | -0.90        | 0.028843        | 29.9009786         | 5        | 28        | 37        | 47.3         | RLLP-like protein 1                                                              | Mus musculus        |
| Q9OQ48        | Nudcd2.D11Erd603e              | 0.54        | -0.90        | 0.028872        | 12.02288632        | 2        | 8         | 11        | 17.7         | NudC domain-containing protein 2                                                 | Mus musculus        |
| Q7TNC4        | Luc7l2                         | 0.54        | -0.90        | 2.49E-09        | 10.91811889        | 7        | 53        | 56        | 46.6         | Putative RNA-binding protein Luc7-like 2                                         | Mus musculus        |
| Q8K2K6        | Afgl1.Hrb.Rip                  | 0.53        | -0.91        | 0.006597        | 25.50988852        | 5        | 36        | 36        | 58.0         | Arf-GAP domain and FG repeat-containing protein 1                                | Mus musculus        |
| Q6P542        | Ahcfl                          | 0.52        | -0.93        | 3.57E-06        | 11.54959357        | 4        | 26        | 29        | 94.9         | ATP-binding cassette sub-family F member 1                                       | Mus musculus        |
| Q9D1P4        | Chordc1.Chp1.Morgana           | 0.51        | -0.96        | 0.008763        | 26.5546428         | 6        | 39        | 43        | 37.4         | Cysteine and histidine-rich domain-containing protein 1                          | Mus musculus        |
| Q9JMD0        | Zn207.Buzz.Zep.Zfp207          | 0.51        | -0.98        | 0.008255        | 23.99580676        | 3        | 23        | 24        | 52.8         | BLU3-interacting and GLEBS motif-containing protein ZNF207                       | Mus musculus        |
| Q3UHT8        | Arhgef9.Kiaa0424               | 0.50        | -1.01        | 0.006597        | 12.78098887        | 1        | 10        | 10        | 60.9         | Rho guanine nucleotide exchange factor 9                                         | Mus musculus        |
| P17751        | Tpi1.Tpi                       | 0.50        | -1.01        | 1.99E-13        | 7.317211555        | 5        | 47        | 48        | 32.2         | Triosephosphate isomerase                                                        | Mus musculus        |
| Q569Z5        | Ddx46.Kiaa0801                 | 0.49        | -1.02        | 2.69E-06        | 14.33116647        | 6        | 44        | 44        | 117.4        | Probable ATP-dependent RNA helicase DDX46                                        | Mus musculus        |
| Q9QZQ1        | Mli4.A6                        | 0.49        | -1.03        | 8.97E-06        | 12.42007126        | 5        | 26        | 27        | 206.5        | Afidin                                                                           | Mus musculus        |
| E9Q6E5        | Srsf11 ECO:0000313 Ensembl:EN  | 0.49        | -1.04        | 0.000405        | 17.0504658         | 3        | 24        | 24        | 56.7         | Serine/arginine-rich-splicing factor 11                                          | Mus musculus        |
| Q8K4G5        | Ablim1.Ablim.Kiaa0059          | 0.48        | -1.06        | 3.81E-08        | 10.59657982        | 5        | 36        | 36        | 96.8         | Actin-binding LIM protein 1                                                      | Mus musculus        |
| Q8CEC5        | Nkiras1                        | 0.48        | -1.07        | 0.008788        | 21.90071149        | 3        | 17        | 17        | 21.7         | NF-kappa-B inhibitor-interacting Ras-like protein 1                              | Mus musculus        |
| Q6NVF9        | Cpsf6                          | 0.47        | -1.09        | 2.2E-06         | 13.08770885        | 5        | 35        | 35        | 59.2         | Cleavage and polyadenylation specificity factor subunit 6                        | Mus musculus        |
| E9NP24        | Fga ECO:0000313 Ensembl:ENSM   | 0.46        | -1.11        | 3.13E-07        | 9.939615358        | 4        | 27        | 28        | 87.4         | Fibrinogen alpha chain                                                           | Mus musculus        |
| Q3UEB3        | Puf60                          | 0.45        | -1.16        | 0.0092          | 18.06794244        | 3        | 13        | 16        | 60.2         | Poly(U)-binding factor PUF60                                                     | Mus musculus        |
| Q62418        | Dbnl.Abp1.Sh3p7                | 0.45        | -1.16        | 0.000339        | 15.50077896        | 4        | 22        | 26        | 48.7         | Drebrin-like protein                                                             | Mus musculus        |
| Q9QYH6        | Maged1.Nrage                   | 0.44        | -1.19        | 0.008788        | 21.8912355         | 3        | 17        | 17        | 85.7         | Melanoma-associated antigen D1                                                   | Mus musculus        |
| Q9R0P9        | Uchl1                          | 0.40        | -1.34        | 4.32E-08        | 9.046090987        | 4        | 28        | 30        | 24.8         | Ubiquitin carboxyl-terminal hydrolase isozyme L1                                 | Mus musculus        |
| G3XA57        | Rab11.fip2                     | 0.38        | -1.38        | 0.000153        | 13.07310491        | 3        | 19        | 20        | 58.2         | Rab11 family-interacting protein 2                                               | Mus musculus        |
| Q801Z3        | Dnajc6.Kiaa0473                | 0.36        | -1.47        | 0.000209        | 15.19830231        | 3        | 23        | 27        | 102.3        | Putative tyrosine-protein phosphatase auxilin                                    | Mus musculus        |
| Q6ZQ82        | Arhgap26.Kiaa0621              | 0.34        | -1.57        | 0.006097        | 12.48430392        | 2        | 10        | 11        | 92.1         | Rho GTPase-activating protein 26                                                 | Mus musculus        |
| Q9CW79        | Golga1                         | 0.33        | -1.59        | 0.000147        | 13.00066363        | 5        | 20        | 22        | 87.3         | Golgin subfamily A member 1                                                      | Mus musculus        |
| <b>Q8BG95</b> | <b>Ppp1r12b.Mypt2</b>          | <b>0.33</b> | <b>-1.59</b> | <b>0.018806</b> | <b>19.44097598</b> | <b>1</b> | <b>11</b> | <b>11</b> | <b>109.0</b> | <b>Protein phosphatase 1 regulatory subunit 12B</b>                              | <b>Mus musculus</b> |
| Q99MR8        | Mccc1.Mcca                     | 0.29        | -1.77        | 9.64E-06        | 12.14224409        | 3        | 24        | 24        | 79.3         | Methylcrotonoyl-CoA carboxylase subunit alpha, mitochondrial                     | Mus musculus        |
| Q80WC7        | Agfg2.Hrbl.Rabr                | 0.29        | -1.78        | 0.012824        | 12.56489419        | 2        | 9         | 12        | 49.0         | Arf-GAP domain and FG repeat-containing protein 2                                | Mus musculus        |
| Q68FD9        | Kiaa1549                       | 0.27        | -1.89        | 0.01069         | 14.76231614        | 2        | 10        | 10        | 209.2        | UPF0606 protein KIAA1549                                                         | Mus musculus        |
| <b>Q9DBR7</b> | <b>Ppp1r12a.Mypt1</b>          | <b>0.22</b> | <b>-2.17</b> | <b>1.45E-05</b> | <b>15.04051788</b> | <b>6</b> | <b>38</b> | <b>38</b> | <b>115.0</b> | <b>Protein phosphatase 1 regulatory subunit 12A</b>                              | <b>Mus musculus</b> |
| B1AR51        | Dnab9.Dnahe9.RP23-215H18.2-001 | 0.00        | -1000.00     |                 |                    | 1        | 3         | 3         | 512.4        | Dynein, axonemal, heavy chain 9                                                  | Mus musculus        |
| P47738        | Aldh2.Ahd-1.Ahd1               | 0.00        | -1000.00     |                 |                    | 1        | 3         | 3         | 56.5         | Aldehyde dehydrogenase, mitochondrial                                            | Mus musculus        |
| Q8CGY8        | Ogt                            | 0.00        | -1000.00     |                 |                    | 1        | 3         | 3         | 117.0        | UDP-N-acetylglucosamine--peptide N-acetylglucosaminyltransferase 110 kDa subunit | Mus musculus        |
| Q91WV0        | Dr1                            | 0.00        | -1000.00     |                 |                    | 1        | 3         | 3         | 19.4         | Protein Dr1                                                                      | Mus musculus        |

**Extended Table 3. List of the WFA protein partners.** Analysis of the changing WFA interactors in WT vs KD mice. In WT cells, 70 proteins were enriched or unique (log<sub>2</sub> ratio=1000) compared to Cx30 KD cells (with the following parameters: number of peptides≥3, ratio≥1.5 and p-value≤0.05), while in Cx30 KD cells 77 proteins were enriched or unique (log<sub>2</sub> ratio = -1000) compared to WT cells (with the following parameters: number of peptides≥3, ratio≥1/1.5 and p-value≤0.05). WT and KD proteins are highlighted in red and green, respectively. Protein from the pathways Rho GTPase activate KTN1 (bold green) and Rho GTPase activate ROCK (bold red) are indicated.

| 361/2370 proteins | Gene & Synonyms                         | Cx30 WT/KD |         |              |             |                       |              | Total  | MW                                                           | Description                                                                                                                                                                                  | Species      |
|-------------------|-----------------------------------------|------------|---------|--------------|-------------|-----------------------|--------------|--------|--------------------------------------------------------------|----------------------------------------------------------------------------------------------------------------------------------------------------------------------------------------------|--------------|
|                   |                                         | Ratio      | Log2    | Adj. p-value | CV %        | Distinct peptide used | Peptide used |        |                                                              |                                                                                                                                                                                              |              |
| P04919            | Slc4a1, Ael1                            | 1000.00    | 1000.00 |              |             | 1                     | 5            | 103.1  | Band 3 anion transport protein                               | Mus musculus                                                                                                                                                                                 |              |
| Q9OXQ1            | Pilc7b                                  | 1000.00    | 1000.00 |              |             | 1                     | 5            | 51.3   | cAMP-specific 3',5'-cyclic phosphodiesterase 7B              | Mus musculus                                                                                                                                                                                 |              |
| Q9R087            | Gnec5                                   | 1000.00    | 1000.00 |              |             | 1                     | 5            | 63.1   | Glypican-6                                                   | Mus musculus                                                                                                                                                                                 |              |
| P11031            | Subl1, P64, Rpo2tc1                     | 1000.00    | 1000.00 |              |             | 1                     | 4            | 14.4   | Activated RNA polymerase II transcriptional coactivator p15  | Mus musculus                                                                                                                                                                                 |              |
| QBBOU6            | Gj2c, Gj12                              | 1000.00    | 1000.00 |              |             | 1                     | 3            | 47.0   | Gap junction gamma-2 protein                                 | Mus musculus                                                                                                                                                                                 |              |
| Q8C0L8            | Cog5                                    | 1000.00    | 1000.00 |              |             | 1                     | 3            | 91.4   | Conserved oligomeric Golgi complex subunit 5                 | Mus musculus                                                                                                                                                                                 |              |
| Q8VC31            | Cog9                                    | 1000.00    | 1000.00 |              |             | 1                     | 3            | 61.4   | Coiled-coil domain-containing protein 9                      | Mus musculus                                                                                                                                                                                 |              |
| Q9JMG3            | Tmbb1, Hops                             | 1000.00    | 1000.00 |              |             | 1                     | 3            | 26.3   | Transmembrane and ubiquitin-like domain-containing protein 1 | Mus musculus                                                                                                                                                                                 |              |
| Q8R3I2            | Mbsat2, Lpact4, Oact2                   | 5.53       | 2.47    | 0.0029       | 15.27824861 | 1                     | 8            | 59.0   | Lysophospholipid acyltransferase 2                           | Mus musculus                                                                                                                                                                                 |              |
| AA01D5RML8        | Gml1, G639                              | 3.79       | 1.92    | 0.0265       | 26.08713593 | 1                     | 8            | 65.4   | Predicted gene 11639                                         | Mus musculus                                                                                                                                                                                 |              |
| Q3U0L2            | Ankrd33b                                | 3.25       | 1.70    | 0.0294       | 26.84235247 | 1                     | 8            | 53.2   | Ankyrin repeat domain-containing protein 33B                 | Mus musculus                                                                                                                                                                                 |              |
| P0C673            | Igsl1                                   | 3.20       | 1.68    | 0.0248       | 25.65673496 | 1                     | 8            | 46.1   | Immunoglobulin superfamily member 11                         | Mus musculus                                                                                                                                                                                 |              |
| Q4UZR1            | Herc2, Jfd2, Kiaa0393, Rjs              | 3.02       | 1.59    | 0.0175       | 23.28784987 | 1                     | 8            | 52.7   | E3 ubiquitin-protein ligase HERC2                            | Mus musculus                                                                                                                                                                                 |              |
| Q05D44            | Ehlf5b, If2                             | 2.79       | 1.48    | 0.0139       | 16.63238791 | 1                     | 6            | 137.6  | Eukaryotic translation initiation factor 5B                  | Mus musculus                                                                                                                                                                                 |              |
| P23242            | Gjal, Ctnn-43                           | 2.74       | 1.46    | 4E-35        | 5.270050708 | 16                    | 135          | 142.43 | Gap junction alpha-1 protein                                 | Mus musculus                                                                                                                                                                                 |              |
| O99012            | Pex5, Pex1                              | 2.53       | 1.34    | 0.03         | 26.96009055 | 1                     | 8            | 70.8   | Peroxisomal targeting signal 1 receptor                      | Mus musculus                                                                                                                                                                                 |              |
| Q80U35            | Arhgef17, Kiaa0337                      | 2.48       | 1.31    | 0.001        | 10.03391809 | 1                     | 7            | 8      | 221.7                                                        | Rho guanine nucleotide exchange factor 17                                                                                                                                                    | Mus musculus |
| Q9Z0U0            | Xpr1, Syg1                              | 2.43       | 1.28    | 0.0012       | 17.76751762 | 2                     | 13           | 15     | 81.8                                                         | ReName: Full=Xenotropic and polytropic retrovirus receptor 1; AltName: Full=Protein SYGI homolog; AltName: Full=Rmc-1                                                                        | Mus musculus |
| P58390            | Kcnn2, Sk2                              | 2.36       | 1.24    | 0.0242       | 23.26853301 | 1                     | 7            | 8      | 91.6                                                         | Small conductance calcium-activated potassium channel protein 2                                                                                                                              | Mus musculus |
| Q78K4             | Apoel, Fam121a, Mic27                   | 2.25       | 1.17    | 0.0028       | 21.65556978 | 2                     | 15           | 15     | 29.3                                                         | MICOS complex subunit Mic27                                                                                                                                                                  | Mus musculus |
| Q9JKC6            | Cend1, Bm88                             | 2.15       | 1.11    | 6E-06        | 18.2372205  | 7                     | 84           | 109    | 15.0                                                         | Cell cycle exit and neuronal differentiation protein 1                                                                                                                                       | Mus musculus |
| Q8VHG2            | Amot, Kiaa1071                          | 2.15       | 1.11    | 2E-06        | 10.62478604 | 3                     | 18           | 21     | 120.9                                                        | Angiomotin                                                                                                                                                                                   | Mus musculus |
| Q84640            | Kcnnml, Kcnnma                          | 2.08       | 1.06    | 0.0208       | 33.26709837 | 2                     | 28           | 32     | 134.4                                                        | Calcium-activated potassium channel subunit alpha-1                                                                                                                                          | Mus musculus |
| Q920M5            | Coro6                                   | 2.05       | 1.04    | 0.0488       | 30.92361688 | 1                     | 8            | 8      | 52.6                                                         | Coro6in-6                                                                                                                                                                                    | Mus musculus |
| Q9M474            | Krt82, Krt2-20, Krtbb2                  | 2.05       | 1.03    | 0.0196       | 21.73252443 | 1                     | 7            | 8      | 57.1                                                         | Keratin, type II cuticular Hb2                                                                                                                                                               | Mus musculus |
| Q9WTR1            | Tmv2, Grc                               | 2.05       | 1.03    | 0.0002       | 16.87816127 | 2                     | 19           | 24     | 86.0                                                         | Transient receptor potential cation channel subfamily V member 2                                                                                                                             | Mus musculus |
| Q9Z044            | Noe1                                    | 2.01       | 1.01    | 1E-14        | 10.71536481 | 15                    | 147          | 152    | 160.5                                                        | Nitric oxide synthase, brain                                                                                                                                                                 | Mus musculus |
| Q9CQR2            | Rps21                                   | 2.01       | 1.01    | 0.0011       | 19.57578473 | 2                     | 16           | 16     | 9.1                                                          | 40S ribosomal protein S21                                                                                                                                                                    | Mus musculus |
| P03995            | Glyp                                    | 1.99       | 1.00    | 2E-11        | 11.75390763 | 11                    | 89           | 92     | 49.9                                                         | Glial fibrillary acidic protein                                                                                                                                                              | Mus musculus |
| Q8CO4             | Ccser1, Fam190a, Kiaa1680               | 1.96       | 0.97    | 0.0495       | 34.70524014 | 2                     | 12           | 14     | 98.2                                                         | Serine-rich coiled-coil domain-containing protein 1                                                                                                                                          | Mus musculus |
| Q3UEB3            | Puf60                                   | 1.95       | 0.97    | 0.0086       | 25.21148427 | 2                     | 14           | 16     | 60.2                                                         | Poly(U)-binding-slicing factor PUF60                                                                                                                                                         | Mus musculus |
| Q6PHZ2            | Camk2d, Kiaa4163                        | 1.95       | 0.96    | 0.0095       | 27.50533056 | 3                     | 19           | 23     | 56.4                                                         | Calcium/calmodulin-dependent protein kinase type II subunit delta                                                                                                                            | Mus musculus |
| Q8CGY8            | Ogt                                     | 1.93       | 0.95    | 0.0042       | 14.30719524 | 1                     | 7            | 8      | 117.0                                                        | UDP-N-acetylglucosamine-6-phosphate N-acetylglucosaminyltransferase 110 kDa subunit                                                                                                          | Mus musculus |
| P53870            | Phf5a                                   | 1.93       | 0.95    | 0.0209       | 19.07489568 | 1                     | 6            | 7      | 12.4                                                         | PHD finger-like domain-containing protein 5A                                                                                                                                                 | Mus musculus |
| Q8BQ30            | Ppp1r18                                 | 1.93       | 0.95    | 0.0099       | 14.95732224 | 1                     | 6            | 7      | 65.6                                                         | Phosphoinositide 3-kinase                                                                                                                                                                    | Mus musculus |
| Q80YS6            | Afp1, Kiaa3018                          | 1.92       | 0.94    | 0.0013       | 20.01038991 | 2                     | 16           | 17     | 80.6                                                         | Actin filament-associated protein 1                                                                                                                                                          | Mus musculus |
| Q80S4             | Mib1, Dip1, Kiaa1323, Mib               | 1.92       | 0.94    | 0.0106       | 26.72801362 | 2                     | 15           | 16     | 110.1                                                        | E3 ubiquitin-protein ligase MIB1                                                                                                                                                             | Mus musculus |
| P43006            | Slc1a2, Eaat2, Glt1                     | 1.91       | 0.93    | 6E-08        | 14.68870554 | 7                     | 74           | 78     | 62.0                                                         | Excitatory amino acid transporter 2                                                                                                                                                          | Mus musculus |
| Q91YD3            | Depla, Mifc1, Smif                      | 1.84       | 0.88    | 8E-06        | 16.09537065 | 5                     | 35           | 36     | 65.2                                                         | mRNA-decapping enzyme 1A                                                                                                                                                                     | Mus musculus |
| Q80U59            | Kiaa0232, D5Erd579e                     | 1.84       | 0.88    | 0.0003       | 2.889050761 | 1                     | 5            | 7      | 154.8                                                        | Uncharacterized protein KIAA0232                                                                                                                                                             | Mus musculus |
| Q9ERG0            | Limal1, D15Erd366e, Eplin               | 1.84       | 0.88    | 2E-15        | 9.13743917  | 13                    | 85           | 107    | 84.1                                                         | LIM domain and actin-binding protein 1                                                                                                                                                       | Mus musculus |
| E9Q7X6            | Hes1                                    | 1.84       | 0.88    | 0.0114       | 20.94803598 | 1                     | 8            | 8      | 141.9                                                        | Protein HEG homolog 1                                                                                                                                                                        | Mus musculus |
| E9Q9R9            | Dlg5                                    | 1.83       | 0.87    | 8E-05        | 16.89434867 | 4                     | 24           | 28     | 214.4                                                        | Disks large homolog 5                                                                                                                                                                        | Mus musculus |
| P20152            | Vim                                     | 1.82       | 0.87    | 9E-21        | 8.634872678 | 24                    | 176          | 200    | 53.7                                                         | Vimentin                                                                                                                                                                                     | Mus musculus |
| Q80YT7            | Pde4dip, Kiaa0454                       | 1.82       | 0.87    | 0.0182       | 21.31156426 | 1                     | 7            | 7      | 250.6                                                        | Myomegalin                                                                                                                                                                                   | Mus musculus |
| Q62407            | Speg, Apeg1, Kiaa1297                   | 1.80       | 0.85    | 0.0014       | 24.3362335  | 5                     | 38           | 38     | 354.3                                                        | Striated muscle-specific serine/threonine-protein kinase                                                                                                                                     | Mus musculus |
| Q68FF0            | Kiaa1841                                | 1.80       | 0.85    | 0.0344       | 33.66485982 | 2                     | 15           | 16     | 82.0                                                         | Uncharacterized protein KIAA1841                                                                                                                                                             | Mus musculus |
| Q8BMB0            | Emsy                                    | 1.80       | 0.85    | 0.0008       | 22.02271993 | 4                     | 29           | 32     | 135.3                                                        | BRCA2-interacting transcriptional repressor EMSY                                                                                                                                             | Mus musculus |
| Q9CXS4            | Cenpv, Prr6                             | 1.79       | 0.84    | 0.0016       | 24.69191084 | 5                     | 39           | 43     | 27.5                                                         | Centromere protein V                                                                                                                                                                         | Mus musculus |
| Q91VK1            | Bzw2                                    | 1.79       | 0.84    | 0.0233       | 25.15202506 | 1                     | 8            | 8      | 48.1                                                         | Basic leucine zipper and W2 domain-containing protein 2                                                                                                                                      | Mus musculus |
| D3Z2H9            | Tpm3-rs7                                | 1.79       | 0.84    | 0.0048       | 14.85106281 | 1                     | 7            | 8      | 29.0                                                         | Topomycin 3, related sequence 7                                                                                                                                                              | Mus musculus |
| Q5SXA9            | Wwe1, Kiaa0869                          | 1.78       | 0.83    | 7E-13        | 8.492669181 | 7                     | 46           | 50     | 124.1                                                        | Protein KIBRA                                                                                                                                                                                | Mus musculus |
| Q60634            | Fliot2, Eaa1, M17s1                     | 1.78       | 0.83    | 1E-19        | 8.340938211 | 15                    | 125          | 145    | 47.0                                                         | Fliotilin-2                                                                                                                                                                                  | Mus musculus |
| P51954            | Nek1                                    | 1.78       | 0.83    | 0.0219       | 31.82296738 | 3                     | 19           | 22     | 136.7                                                        | Serine/threonine-protein kinase Nek1                                                                                                                                                         | Mus musculus |
| Q8C132            | Bag5                                    | 1.76       | 0.82    | 0.017        | 17.82882101 | 1                     | 6            | 8      | 50.9                                                         | BAG family molecular chaperone regulator 5                                                                                                                                                   | Mus musculus |
| Q3F4S9            | Trpm3                                   | 1.75       | 0.81    | 0.0382       | 28.7906339  | 1                     | 8            | 8      | 196.3                                                        | Transient receptor potential cation channel, subfamily M, member 3                                                                                                                           | Mus musculus |
| Q6PHZ8            | Kemip4, Calp, Kchhp4                    | 1.74       | 0.80    | 0.0115       | 23.95225986 | 2                     | 11           | 11     | 28.8                                                         | Kv channel-interacting protein 4                                                                                                                                                             | Mus musculus |
| Q9WVJ5            | Crybb1                                  | 1.74       | 0.80    | 0.0042       | 23.49681521 | 2                     | 16           | 16     | 28.0                                                         | Beta-crystallin IB1                                                                                                                                                                          | Mus musculus |
| Q8K097            | Faim2, Kiaa0950, Lfg1, Fg2, Nmp35       | 1.71       | 0.78    | 0.0164       | 30.50135515 | 2                     | 20           | 21     | 35.3                                                         | Protein life-guard 2                                                                                                                                                                         | Mus musculus |
| Q9JLV1            | Bag3, Bis, MNCB-2243                    | 1.71       | 0.77    | 0.0221       | 24.74634672 | 1                     | 8            | 8      | 61.9                                                         | BAG family molecular chaperone regulator 3                                                                                                                                                   | Mus musculus |
| B9EKR1            | Pipr21                                  | 1.69       | 0.76    | 3E-05        | 17.95247664 | 3                     | 40           | 43     | 254.4                                                        | Receptor-type tyrosine-protein phosphatase zeta                                                                                                                                              | Mus musculus |
| Q80TN4            | Dnajc16, Kiaa0962                       | 1.69       | 0.75    | 0.0383       | 34.91574117 | 1                     | 16           | 16     | 89.1                                                         | DnaJ homolog subfamily C member 16                                                                                                                                                           | Mus musculus |
| Q60931            | Vdac3                                   | 1.69       | 0.75    | 2E-05        | 19.36404898 | 10                    | 75           | 80     | 30.8                                                         | Voltage-dependent anion-selective channel protein 3                                                                                                                                          | Mus musculus |
| Q8C7U1            | N4hp3                                   | 1.67       | 0.74    | 0.0002       | 18.27906212 | 2                     | 22           | 24     | 60.0                                                         | NEDD4-binding protein 3                                                                                                                                                                      | Mus musculus |
| Q921M4            | Golga2                                  | 1.67       | 0.74    | 3E-05        | 15.0911013  | 3                     | 22           | 24     | 113.3                                                        | Golgin subfamily A member 2                                                                                                                                                                  | Mus musculus |
| Q6URW6            | Myh14                                   | 1.66       | 0.73    | 4E-10        | 11.95723492 | 8                     | 65           | 71     | 228.6                                                        | Myosin-14                                                                                                                                                                                    | Mus musculus |
| Q9E143            | Cldn12                                  | 1.65       | 0.72    | 0.0002       | 15.81540082 | 2                     | 16           | 17     | 27.0                                                         | Claudin-12                                                                                                                                                                                   | Mus musculus |
| Q2KN98            | Specc1, Cytsa, Kiaa0376                 | 1.64       | 0.71    | 1E-13        | 9.661421689 | 8                     | 72           | 80     | 124.5                                                        | Cytopsin-A                                                                                                                                                                                   | Mus musculus |
| Q01815            | Caena1c, Cach2, Caen2, Caen1a1, Cchl1a1 | 1.63       | 0.70    | 0.0002       | 16.0361501  | 2                     | 16           | 16     | 240.1                                                        | Voltage-associated L-type calcium channel subunit alpha-1C                                                                                                                                   | Mus musculus |
| Q60952            | Cep250, Cep2, Inmp                      | 1.63       | 0.70    | 0.0039       | 21.31488712 | 2                     | 13           | 15     | 276.8                                                        | Centrosome-associated protein CEP250                                                                                                                                                         | Mus musculus |
| Q919Y8            | Pllp3, Lpp3, Ppap2b                     | 1.62       | 0.70    | 7E-09        | 10.73715204 | 3                     | 34           | 38     | 35.2                                                         | Phospholipid phosphatase 3                                                                                                                                                                   | Mus musculus |
| Q9DCZ4            | Apoa, Fam121b, Mic23, Mic26             | 1.62       | 0.69    | 0.0225       | 29.60074467 | 2                     | 13           | 14     | 222.6                                                        | MICOS complex subunit Mic26                                                                                                                                                                  | Mus musculus |
| Q8Z1P9            | Gas21l                                  | 1.62       | 0.69    | 0.002        | 20.63275648 | 2                     | 15           | 16     | 72.4                                                         | GA2-like protein 1                                                                                                                                                                           | Mus musculus |
| Q9JIV5            | Cacng3                                  | 1.61       | 0.69    | 9E-14        | 9.897722375 | 9                     | 81           | 95     | 35.5                                                         | Voltage-dependent calcium channel gamma-3 subunit                                                                                                                                            | Mus musculus |
| Q3UGS4            | Merip1, Fam195b                         | 1.61       | 0.69    | 0.0056       | 15.45144941 | 1                     | 7            | 8      | 11.1                                                         | Mapk-regulated corepressor-interacting protein 1                                                                                                                                             | Mus musculus |
| Q9J10             | Cttnbp2, Kiaa1433                       | 1.61       | 0.68    | 0.0006       | 19.51427496 | 3                     | 20           | 22     | 69.8                                                         | CTNBP2 N-terminal-like protein                                                                                                                                                               | Mus musculus |
| O08917            | Fliot1                                  | 1.60       | 0.68    | 1E-19        | 8.218862381 | 16                    | 117          | 137    | 47.5                                                         | Fliotilin-1                                                                                                                                                                                  | Mus musculus |
| Q3UH68            | Limch1, Kiaa1102                        | 1.60       | 0.67    | 3E-18        | 7.542224441 | 11                    | 75           | 88     | 118.2                                                        | LIM and calponin homology domains-containing protein 1                                                                                                                                       | Mus musculus |
| Q5F2E8            | Taok1, Kiaa1361                         | 1.59       | 0.67    | 0.0498       | 25.97215694 | 1                     | 6            | 8      | 116.0                                                        | Serine/threonine-protein kinase TAO1                                                                                                                                                         | Mus musculus |
| P70248            | Myo1f                                   | 1.59       | 0.66    | 0.0007       | 17.90930686 | 2                     | 15           | 16     | 125.9                                                        | Unconventional myosin-Ilf                                                                                                                                                                    | Mus musculus |
| Q8BSM7            | Slc43a1, Lat3                           | 1.58       | 0.66    | 0.0035       | 15.89518801 | 1                     | 8            | 8      | 62.6                                                         | Large neutral amino acids transporter small subunit 3                                                                                                                                        | Mus musculus |
| Q924S8            | Sped1                                   | 1.58       | 0.66    | 0.0153       | 20.28560223 | 1                     | 7            | 8      | 50.7                                                         | Sprouty-related, EVH1 domain-containing protein 1                                                                                                                                            | Mus musculus |
| Q9QWW1            | Homer2, Vest2                           | 1.56       | 0.64    | 1E-09        | 11.05820736 | 5                     | 43           | 48     | 40.6                                                         | Homer protein homolog 2                                                                                                                                                                      | Mus musculus |
| Q3UIB9            | Eed4                                    | 1.56       | 0.64    | 0.0002       | 20.07095831 | 6                     | 34           | 41     | 152.5                                                        | Enhancer of mRNA-decapping protein 4                                                                                                                                                         | Mus musculus |
| Q9EQN3            | Tsc2d4, Thglpit, Tlt2                   | 1.56       | 0.64    | 0.0105       | 20.53718162 | 1                     | 8            | 8      | 40.0                                                         | TSC2 domain family protein 4                                                                                                                                                                 | Mus musculus |
| Q70F11            | Akap9, Kiaa0803                         | 1.55       | 0.64    | 0.0069       | 28.26761036 | 4                     | 29           | 32     | 436.2                                                        | A-kinase anchor protein 9                                                                                                                                                                    | Mus musculus |
| P51655            | Gpe4                                    | 1.55       | 0.64    | 0.0003       | 7.422798252 | 1                     | 7            | 8      | 62.6                                                         | Glypican-4                                                                                                                                                                                   | Mus musculus |
| Q8B137            | Tdp1                                    | 1.55       | 0.64    | 0.043        | 29.73417665 | 1                     | 8            | 8      | 68.7                                                         | RecName: Full=Tyrosyl-DNA phosphodiesterase 1; Short=Tyr-DNA phosphodiesterase 1; EC=3.1.4.; AltName: Full=Protein expressed in male leptotene and zygotene spermatocytes 501; Short=MLZ-501 | Mus musculus |
| Q04750            | Top1, Top-1                             | 1.55       | 0.63    | 0.0088       | 28.13160409 | 3                     | 22           | 24     | 90.9                                                         | DNA topoisomerase 1                                                                                                                                                                          | Mus musculus |
| Q8CGU1            | Calecoo1, Cocca, Kiaa1536               | 1.55       | 0.63    | 0.0375       | 34.76419328 | 2                     | 16           | 16     | 77.3                                                         | Calcium-binding and coiled-coil domain-containing protein 1                                                                                                                                  | Mus musculus |
| B5TYM2            | Ildr2, D1Erd477e, LL1                   | 1.53       | 0.62    | 3E-19        | 8.855401825 | 18                    | 151          | 171    | 73.8                                                         | Immunoglobulin-like domain-containing receptor 2                                                                                                                                             | Mus musculus |
| Q9Q774            | Alp1                                    | 1.53       | 0.61    | 0.0055       | 24.42360369 | 2                     | 16           | 17     | 208.2                                                        | A kinase (PRKA) anchor protein 11                                                                                                                                                            | Mus musculus |
| Q8BLU6            | Lsm11                                   | 1.52       | 0.60    | 0.0059       | 26.97976994 | 3                     | 25           | 29     | 39.9                                                         | U7 snRNP-associated Sm-like protein LSm11                                                                                                                                                    | Mus musculus |
| Q61321            | Six4, Arec3                             | 1.52       | 0.60    | 0.0472       | 28.47663994 | 1                     | 7            | 7      | 82.3                                                         | Homeobox protein SIX4                                                                                                                                                                        | Mus musculus |
| Q9Z140            | Cnpe6                                   | 1.52       | 0.60    | 0.0053       | 27.27761069 | 4                     | 29           | 33     | 61.8                                                         | Copine-6                                                                                                                                                                                     | Mus musculus |
| Q8BIF9            | Chmp2b                                  | 1.51       | 0.60    | 0.0004       | 21.19855737 | 5                     | 33           | 39     | 23.9                                                         | Charged multivesicular body protein 2b                                                                                                                                                       | Mus musculus |
| Q80TM6            | R3hdm2, Kiaa1002                        | 1.51       | 0.59    | 0.0152       | 30.86163387 | 3                     | 23           | 24     | 114.6                                                        | R3H domain-containing protein 2                                                                                                                                                              | Mus musculus |
| P48193            | Epb41, Epb4, L1, Kiaa4056               | 1.51       | 0.59    | 3E-06        | 15.97340665 | 5                     | 43           | 48     | 95.9                                                         | Protein 4.1                                                                                                                                                                                  | Mus musculus |
| E9QAT4            | Sec16a, Kiaa0310, Sec16                 | 1.50       | 0.59    | 1E-04        | 19.49537326 | 6                     | 40           | 54     | 254.2                                                        | Protein transport protein Sec16A                                                                                                                                                             | Mus musculus |
| Q5U4C1            | Gnrasp1, Kiaa0443                       | 1.50       | 0.58    | 7E-07        | 14.38935363 |                       |              |        |                                                              |                                                                                                                                                                                              |              |



|            |                                     |      |       |        |             |    |     |     |       |                                                                                  |              |
|------------|-------------------------------------|------|-------|--------|-------------|----|-----|-----|-------|----------------------------------------------------------------------------------|--------------|
| Q9JIS5     | Sv2a,Kiaa0736,Sv2                   | 0.66 | -0.60 | 1E-05  | 16.49127257 | 6  | 36  | 47  | 82.6  | Synaptic vesicle glycoprotein 2A                                                 | Mus musculus |
| Q9Z0Y1     | Detn3                               | 0.66 | -0.60 | 0.0446 | 37.32886229 | 3  | 21  | 24  | 21.0  | Dynaectin subunit 3                                                              | Mus musculus |
| Q791T5     | Mtchl                               | 0.66 | -0.60 | 0.0031 | 21.28063227 | 2  | 14  | 17  | 41.6  | Mitochondrial carrier homolog 1                                                  | Mus musculus |
| Q9QYR6     | Map1a,Mtap1,Mtp1a                   | 0.66 | -0.60 | 5E-89  | 4.164991746 | 80 | 779 | 891 | 300.1 | Microtubule-associated protein 1A                                                | Mus musculus |
| Q9CZD3     | Gars                                | 0.66 | -0.60 | 0.004  | 16.40472004 | 1  | 8   | 8   | 81.9  | Glycine-tRNA ligase                                                              | Mus musculus |
| Q8C8Y8     | Detn4                               | 0.66 | -0.60 | 0.0057 | 24.58410111 | 3  | 17  | 21  | 53.1  | Dynaectin subunit 4                                                              | Mus musculus |
| P99024     | Tubb5                               | 0.66 | -0.60 | 1E-16  | 8.994813297 | 10 | 98  | 116 | 49.7  | Tubulin beta-5 chain                                                             | Mus musculus |
| Q8K1M6     | Dnm11,Drp1                          | 0.66 | -0.60 | 1E-09  | 12.75243318 | 10 | 74  | 86  | 82.7  | Dynamin-1-like protein                                                           | Mus musculus |
| Q5EBJ4     | Ermn,Kiaa1189                       | 0.66 | -0.60 | 0.004  | 21.36222955 | 2  | 13  | 16  | 32.1  | Ermn                                                                             | Mus musculus |
| OS4916     | Reps1                               | 0.66 | -0.61 | 0.0499 | 35.53319061 | 2  | 13  | 13  | 86.5  | RalBP1-associated Eps domain-containing protein 1                                | Mus musculus |
| Q8ROA7     | Kiaa0513                            | 0.66 | -0.61 | 5E-08  | 12.22193906 | 5  | 36  | 42  | 46.3  | Uncharacterized protein KIAA0513                                                 | Mus musculus |
| Q9WUA3     | Pfkf,Pfk                            | 0.66 | -0.61 | 3E-17  | 8.883185891 | 13 | 107 | 127 | 85.5  | ATP-dependent 6-phosphofructokinase, platelet type                               | Mus musculus |
| P35486     | Pdha1,Pdha-1                        | 0.66 | -0.61 | 0.0002 | 19.22573496 | 4  | 29  | 33  | 43.2  | Pyruvate dehydrogenase E1 component subunit alpha, somatic form, mitochondrial   | Mus musculus |
| Q8R191     | Syng3                               | 0.65 | -0.61 | 0.0027 | 12.80367486 | 1  | 7   | 8   | 24.6  | Synaptogyrin-3                                                                   | Mus musculus |
| Q9D1F4     | Akt1s1 {ECO:0000312 MGI:MG191485}   | 0.65 | -0.61 | 0.0095 | 28.16343782 | 3  | 21  | 22  | 27.5  | Proline-rich AKT1 substrate 1                                                    | Mus musculus |
| Q9DBG3     | Ap2b1,Claph1                        | 0.65 | -0.61 | 5E-07  | 12.27665765 | 3  | 27  | 32  | 104.6 | AP-2 complex subunit beta                                                        | Mus musculus |
| Q7TMY8     | Huwe1,Kiaa0312,Urbel1               | 0.65 | -0.61 | 0.0235 | 25.22582338 | 1  | 8   | 8   | 482.6 | E3 ubiquitin-protein ligase HUWE1                                                | Mus musculus |
| Q9D09      | Rars                                | 0.65 | -0.61 | 0.0006 | 8.99994693  | 1  | 7   | 8   | 75.7  | Arginine-tRNA ligase, cytoplasmic                                                | Mus musculus |
| Q8VU6      | Sfpq                                | 0.65 | -0.61 | 0.0024 | 24.6654712  | 4  | 28  | 32  | 75.4  | Splicing factor, proline- and glutamine-rich                                     | Mus musculus |
| Q6Y685     | Tacc1                               | 0.65 | -0.62 | 0.0013 | 19.97484805 | 2  | 17  | 19  | 84.0  | Transforming acidic coiled-coil-containing protein 1                             | Mus musculus |
| P62852     | Rps25                               | 0.65 | -0.62 | 2E-05  | 18.38236126 | 7  | 54  | 56  | 13.7  | 40S ribosomal protein S25                                                        | Mus musculus |
| Q8R001     | Mapr2                               | 0.65 | -0.62 | 0.0115 | 28.4244877  | 3  | 19  | 24  | 36.9  | Microtubule-associated protein RP/EB family member 2                             | Mus musculus |
| P47857     | PfkM,Pfk-m,Pfka                     | 0.65 | -0.62 | 7E-23  | 8.03287883  | 14 | 173 | 190 | 85.3  | ATP-dependent 6-phosphofructokinase, muscle type                                 | Mus musculus |
| Q9CQD1     | Rab5a,nyRab5a                       | 0.65 | -0.62 | 0.0097 | 29.16190164 | 4  | 26  | 27  | 23.6  | Ras-related protein Rab-5A                                                       | Mus musculus |
| P04264     | KRT1,KRT1A                          | 0.65 | -0.63 | 4E-09  | 14.5272373  | 19 | 151 | 167 | 66.0  | SWISS-PROT:P04264 Tax. Id=9606 Gene_Symbol=KRT1 Keratin, type II cytoskeletal 1  | Homo sapiens |
| O35643     | Ap1b1,Adb1b                         | 0.65 | -0.63 | 5E-06  | 9.566031017 | 2  | 14  | 17  | 103.9 | AP-1 complex subunit beta-1                                                      | Mus musculus |
| P61264     | Stx1b,Stx1b1,Stx1b2                 | 0.64 | -0.63 | 0.0111 | 29.60131804 | 3  | 24  | 24  | 33.2  | Syntaxin-1B                                                                      | Mus musculus |
| Q9Z1G4     | Atp6v0a1,Atp6n1                     | 0.64 | -0.63 | 2E-05  | 18.12694413 | 9  | 54  | 68  | 96.5  | V-type proton ATPase F116 kDa subunit a isoform 1                                | Mus musculus |
| Q9D1G1     | Rab1b                               | 0.64 | -0.63 | 1E-06  | 15.53166453 | 5  | 49  | 59  | 22.2  | Ras-related protein Rab-1B                                                       | Mus musculus |
| Q9D6F9     | Tubb4a,Tubb4                        | 0.64 | -0.64 | 8E-16  | 9.638276052 | 10 | 112 | 120 | 49.6  | Tubulin beta-4A chain                                                            | Mus musculus |
| P63101     | Ywhaz                               | 0.64 | -0.64 | 9E-07  | 15.24816876 | 5  | 46  | 50  | 27.8  | 14-3-3 protein zeta/delta                                                        | Mus musculus |
| O09111     | Ndubf1,Np15                         | 0.64 | -0.64 | 0.0059 | 26.18282633 | 3  | 21  | 24  | 17.4  | NADH dehydrogenase [ubiquinone] 1 beta subcomplex subunit 11, mitochondrial      | Mus musculus |
| P0CT70     | Wip3,Cr16                           | 0.64 | -0.64 | 0.0007 | 22.46339467 | 4  | 35  | 37  | 49.5  | WAS/WASL-interacting protein family member 3                                     | Mus musculus |
| Q64521     | Gpd2,Gdml                           | 0.64 | -0.64 | 0.0217 | 31.76778378 | 2  | 19  | 23  | 81.0  | Glycerol-3-phosphate dehydrogenase, mitochondrial                                | Mus musculus |
| O08749     | Dld                                 | 0.64 | -0.64 | 1E-05  | 17.55817657 | 7  | 49  | 53  | 54.3  | Dihydropyridol dehydrogenase, mitochondrial                                      | Mus musculus |
| Q9WTQ5     | Akap12,Gag12,Ssecks                 | 0.64 | -0.64 | 0.0215 | 32.96536539 | 3  | 24  | 24  | 180.7 | A-kinase anchor protein 12                                                       | Mus musculus |
| P80318     | Cct3,Cctg                           | 0.64 | -0.64 | 0.0031 | 24.3616954  | 4  | 23  | 26  | 60.6  | T-complex protein 1 subunit gamma                                                | Mus musculus |
| Q3TDD9     | Ppp1r2l,Ceccl28,Klra1               | 0.64 | -0.64 | 0.0079 | 29.06439763 | 3  | 31  | 32  | 88.3  | Protein phosphatase 1 regulatory subunit 21                                      | Mus musculus |
| Q8K0T0     | Rtn1,Nsp                            | 0.64 | -0.65 | 9E-10  | 12.84892757 | 9  | 82  | 93  | 83.6  | Reticulon-1                                                                      | Mus musculus |
| Q9VWK4     | Ehd1,Past1                          | 0.64 | -0.65 | 0.0002 | 18.9926849  | 2  | 24  | 24  | 60.6  | EH domain-containing protein 1                                                   | Mus musculus |
| O88741     | Gdap1                               | 0.64 | -0.65 | 5E-08  | 12.94116473 | 6  | 44  | 53  | 41.3  | Ganglioside-induced differentiation-associated protein 1                         | Mus musculus |
| Q3U160     | Dip2b,Kiaa1463                      | 0.64 | -0.65 | 0.0055 | 25.24688507 | 3  | 19  | 19  | 171.1 | Disco-interacting protein 2 homolog B                                            | Mus musculus |
| Q9CR61     | Ndubf7                              | 0.64 | -0.65 | 0.0078 | 19.13782391 | 1  | 8   | 9   | 16.3  | NADH dehydrogenase [ubiquinone] 1 beta subcomplex subunit 7                      | Mus musculus |
| Q9EQF6     | Dpysl5,Cmp55                        | 0.64 | -0.65 | 5E-05  | 19.29334809 | 5  | 50  | 60  | 61.5  | Dihydropyrimidinase-related protein 3                                            | Mus musculus |
| Q9QXY6     | Ehd3,Ehd2                           | 0.63 | -0.66 | 0.0017 | 20.79487866 | 2  | 16  | 16  | 60.8  | EH domain-containing protein 3                                                   | Mus musculus |
| A8DLUK4    | Hbb-b1,Hbb-b2,Hbbt1,Hbbt2           | 0.63 | -0.66 | 0.0351 | 36.67390913 | 5  | 29  | 35  | 15.7  | Beta-globin                                                                      | Mus musculus |
| Q6GYF7     | Ralgap1,Garml1,Kiaa0884,Tulp1       | 0.63 | -0.66 | 9E-10  | 11.35388119 | 7  | 50  | 60  | 229.4 | Ral GTPase-activating protein subunit alpha-1                                    | Mus musculus |
| Q8BW74     | Hlf                                 | 0.63 | -0.66 | 0.0167 | 17.70383814 | 1  | 6   | 8   | 33.1  | Hepatic leukemia factor                                                          | Mus musculus |
| P17182     | Eno1,Eno-1                          | 0.63 | -0.66 | 8E-05  | 16.97164972 | 2  | 23  | 24  | 47.1  | Alpha-enolase                                                                    | Mus musculus |
| P97427     | Crmp1,Dpysl1,Ulip3                  | 0.63 | -0.66 | 2E-10  | 12.29460088 | 13 | 86  | 98  | 62.2  | Dihydropyrimidinase-related protein 1                                            | Mus musculus |
| Q3UGY8     | Arfge3,Big3,D10Bwg1379e,Kiaa1244    | 0.63 | -0.66 | 0.0003 | 21.38739924 | 7  | 41  | 46  | 240.1 | Brefeldin A-inhibited guanine nucleotide-exchange protein 3                      | Mus musculus |
| Q6ZQK5     | Acap2,Centb2,Kiaa0041               | 0.63 | -0.66 | 0.0008 | 17.43091707 | 2  | 14  | 16  | 87.2  | Arf-GAP with coiled-coil, ANK repeat and PH domain-containing protein 2          | Mus musculus |
| Q9D5V5     | Cul5                                | 0.63 | -0.67 | 0.0168 | 17.74380188 | 1  | 6   | 6   | 91.0  | Cullin-5                                                                         | Mus musculus |
| Q8BYK5     | Phact3,Scapin1                      | 0.63 | -0.67 | 0.0003 | 17.5508534  | 3  | 18  | 21  | 62.7  | Phosphatase and actin regulator 3                                                | Mus musculus |
| Q9Z2B1     | Macro1,Lrp16                        | 0.63 | -0.67 | 0.0356 | 26.10912592 | 1  | 7   | 8   | 35.3  | O-acetyl-ADP-ribose deacetylase MACROD1                                          | Mus musculus |
| Q9JK48     | Sh3glb1,Kiaa0491                    | 0.63 | -0.67 | 0.0046 | 16.90829842 | 2  | 9   | 10  | 40.9  | Endophilin-B1                                                                    | Mus musculus |
| Q8R3V5     | Sh3glb2,Kiaa1848                    | 0.63 | -0.67 | 8E-06  | 15.27177455 | 4  | 29  | 31  | 44.5  | Endophilin-B2                                                                    | Mus musculus |
| P19783     | Cox4l1,Cox4,Cox4a                   | 0.63 | -0.68 | 5E-05  | 20.27259545 | 7  | 69  | 76  | 19.5  | Cytochrome c oxidase subunit 4 isoform 1, mitochondrial                          | Mus musculus |
| O35250     | Exoc7,Exo70                         | 0.63 | -0.68 | 5E-05  | 18.14492564 | 5  | 34  | 38  | 80.0  | Exocyst complex component 7                                                      | Mus musculus |
| P62631     | Eef1a2,Eef1al,Sm                    | 0.62 | -0.68 | 1E-08  | 12.9158935  | 8  | 54  | 59  | 50.5  | Elongation factor 1-alpha 2                                                      | Mus musculus |
| P56399     | Usp5,Iso1                           | 0.62 | -0.68 | 2E-05  | 17.21876796 | 4  | 37  | 40  | 95.8  | Ubiquitin carboxyl-terminal hydrolase 5                                          | Mus musculus |
| Q8R313     | Exoc6,Sec15a,Sec15l1                | 0.62 | -0.69 | 0.0199 | 24.0868969  | 1  | 8   | 8   | 93.1  | Exocyst complex component 6                                                      | Mus musculus |
| Q8K394     | Pic12,Kiaa1092,Plcc2                | 0.62 | -0.69 | 0.0082 | 26.10152014 | 3  | 17  | 18  | 128.8 | Inactive phospholipase C-like protein 2                                          | Mus musculus |
| A0A338P6R8 | Gm49601                             | 0.62 | -0.69 | 0.0003 | 18.92192299 | 2  | 23  | 24  | 41.9  | Uncharacterized protein                                                          | Mus musculus |
| Q6PDL0     | Dync1l2,Dncl2,Dnclc2                | 0.62 | -0.69 | 3E-11  | 10.89446372 | 10 | 66  | 82  | 54.2  | Cytoplasmic dynein 1 light intermediate chain 2                                  | Mus musculus |
| Q9JLR9     | Nrip3,D7H11orf14                    | 0.62 | -0.69 | 0.0095 | 26.18782392 | 1  | 15  | 16  | 26.9  | Nuclear receptor-interacting protein 3                                           | Mus musculus |
| Q8RBRK8    | Pkrac2                              | 0.62 | -0.69 | 0.0327 | 27.58059041 | 1  | 8   | 8   | 62.0  | 5'-AMP-activated protein kinase catalytic subunit alpha-2                        | Mus musculus |
| Q62448     | Eif4g2,Nat1                         | 0.62 | -0.70 | 6E-06  | 12.71447309 | 3  | 20  | 28  | 102.1 | Eukaryotic translation initiation factor 4 gamma 2                               | Mus musculus |
| Q8BVE3     | Atp6v1h                             | 0.62 | -0.70 | 1E-10  | 12.47752868 | 10 | 95  | 106 | 55.9  | V-type proton ATPase subunit H                                                   | Mus musculus |
| O35382     | Exoc4,Sec8,Sec8l1                   | 0.62 | -0.70 | 2E-05  | 13.23828219 | 4  | 19  | 27  | 110.5 | Exocyst complex component 4                                                      | Mus musculus |
| O54781     | Srp2                                | 0.62 | -0.70 | 0.0329 | 33.35093807 | 2  | 15  | 16  | 76.8  | SRSF protein kinase 2                                                            | Mus musculus |
| Q3TC1J     | Fam175b,Abro1,Kiaa0157              | 0.61 | -0.70 | 0.0003 | 18.27332797 | 2  | 21  | 22  | 46.9  | BRISC complex subunit Abraxas 2                                                  | Mus musculus |
| Q8VDN2     | Atp1a1                              | 0.61 | -0.71 | 9E-16  | 9.516212306 | 14 | 106 | 117 | 113.0 | Sodium/potassium-transporting ATPase subunit alpha-1                             | Mus musculus |
| CYR132     | Loxhd1                              | 0.61 | -0.71 | 0.0332 | 25.5151337  | 1  | 7   | 8   | 235.8 | Lipoxygenase homology domain-containing protein 1                                | Mus musculus |
| Q8OUJ7     | Rab3gap1,Kiaa0066,Rab3gap           | 0.61 | -0.71 | 8E-05  | 16.90205191 | 4  | 24  | 29  | 110.2 | Rab3 GTPase-activating protein catalytic subunit                                 | Mus musculus |
| Q9CZS1     | Aldh1b1,Aldhx                       | 0.61 | -0.71 | 0.0454 | 30.21256766 | 1  | 8   | 8   | 57.6  | Aldehyde dehydrogenase X, mitochondrial                                          | Mus musculus |
| Q61644     | Pacsin1,Pacsin                      | 0.61 | -0.71 | 2E-05  | 18.16503736 | 6  | 47  | 57  | 50.6  | Protein kinase C and casein kinase substrate in neurons protein 1                | Mus musculus |
| P28661     | Sept4,Sept2                         | 0.61 | -0.71 | 0.0029 | 25.62759717 | 4  | 31  | 31  | 54.9  | Septin-4                                                                         | Mus musculus |
| Q8C1C4     | Synj1,Kiaa0910                      | 0.61 | -0.72 | 2E-33  | 6.22844737  | 26 | 196 | 219 | 172.6 | Synaptojanin-1                                                                   | Mus musculus |
| O35926     | Cdk5r2,Nck5ai                       | 0.61 | -0.72 | 0.0453 | 25.01776074 | 1  | 6   | 8   | 38.9  | Cyclin-dependent kinase 5 activator 2                                            | Mus musculus |
| P62814     | Atp6v1b2,Atp6b2,Vat2                | 0.61 | -0.72 | 1E-18  | 8.41475145  | 13 | 109 | 121 | 56.6  | V-type proton ATPase subunit B, brain isoform                                    | Mus musculus |
| Q8JZO9     | Eif3f,Eif3e9                        | 0.60 | -0.73 | 0.0069 | 13.27849751 | 1  | 6   | 8   | 91.4  | Eukaryotic translation initiation factor 3 subunit B                             | Mus musculus |
| Q8CB44     | Gramd4,Dip,Kiaa0767                 | 0.60 | -0.73 | 0.0231 | 25.10031497 | 1  | 8   | 8   | 72.3  | GRAM domain-containing protein 4                                                 | Mus musculus |
| Q8OUG5     | Sept9,Kiaa0991,Sint1                | 0.60 | -0.73 | 2E-18  | 8.127504836 | 11 | 92  | 98  | 65.6  | Septin-9                                                                         | Mus musculus |
| P11983     | Tcp1,Cet1,Ccta                      | 0.60 | -0.74 | 2E-15  | 8.972704051 | 11 | 80  | 87  | 60.4  | T-complex protein 1 subunit alpha                                                | Mus musculus |
| Q62167     | Ddx3x,D1Pas1-rs2,Ddx3,Dead3,Erh     | 0.60 | -0.74 | 5E-11  | 10.91785697 | 10 | 62  | 71  | 73.1  | ATP-dependent RNA helicase DDX3X                                                 | Mus musculus |
| P13645     | KRT10,KPP                           | 0.60 | -0.75 | 0.0088 | 30.34321092 | 7  | 44  | 56  | 59.5  | SWISS-PROT:P13645 Tax. Id=9606 Gene_Symbol=KRT10 Keratin, type I cytoskeletal 10 | Homo sapiens |
| P19096     | Fasn                                | 0.60 | -0.75 | 0.0002 | 18.10114002 | 4  | 24  | 25  | 272.4 | Fatty acid synthase                                                              | Mus musculus |
| Q6PCN3     | Ttk1                                | 0.60 | -0.75 | 0.0013 | 23.56332909 | 5  | 32  | 38  | 141.6 | Tau-tubulin kinase 1                                                             | Mus musculus |
| P63040     | Cplx1                               | 0.60 | -0.75 | 0.001  | 19.35733809 | 2  | 16  | 16  | 15.1  | Complexin-1                                                                      | Mus musculus |
| P80316     | Cct5,Ccte,Kiaa0098                  | 0.60 | -0.75 | 9E-07  | 15.10554271 | 5  | 45  | 48  | 59.6  | T-complex protein 1 subunit epsilon                                              | Mus musculus |
| P47809     | Map2k4,Ink1l1,Mek4,Mkk4,Prkkn4,Sek1 | 0.60 | -0.75 | 4E-07  | 14.93521097 | 6  | 51  | 54  | 44.1  | Dual specificity mitogen-activated protein kinase kinase 4                       | Mus musculus |
| O88485     | Dync1l1,Dncl1,Dnclc1                | 0.59 | -0.75 | 7E-09  | 12.58717776 | 6  | 53  | 60  | 70.7  | Cytoplasmic dynein 1 intermediate chain 1                                        | Mus musculus |
| Q8BWJ3     | Phka2                               | 0.59 | -0.76 | 0.0293 | 26.78871653 | 1  | 8   | 8   | 138.5 | Phosphorylase b kinase regulatory subunit alpha, liver isoform                   | Mus musculus |
| Q68FL4     | Aheyl2                              | 0.59 | -0.76 | 0.0105 | 20.51269916 | 1  | 8   | 8   | 66.9  | Putative adenosylhomocysteinase 3                                                | Mus musculus |
| Q9ERD7     | Tubb3                               | 0.59 | -0.76 | 2E-26  | 7.496062752 | 16 | 200 | 220 | 50.4  | Tubulin beta-3 chain                                                             | Mus musculus |
| Q0GNC1     | Inf2                                | 0.59 | -0.76 | 0.0446 | 30.04891962 | 1  | 8   | 8   | 138.6 | Inverted formin-2                                                                | Mus musculus |
| Q99KJ8     | Detn2                               | 0.58 | -0.78 | 1E-29  | 6.541067989 | 18 | 169 | 189 | 44.1  | Dynaectin subunit 2                                                              | Mus musculus |
| P63038     | Hspd1,Hsp60                         | 0.58 | -0.78 | 5E-18  | 9.442267052 | 20 | 1   |     |       |                                                                                  |              |

|        |                                  |       |        |             |             |    |      |      |                                                                      |                                                                                     |              |
|--------|----------------------------------|-------|--------|-------------|-------------|----|------|------|----------------------------------------------------------------------|-------------------------------------------------------------------------------------|--------------|
| Q05920 | Pe_Pex                           | 0.56  | -0.83  | 5E-05       | 13.8504378  | 3  | 17   | 23   | 129.7                                                                | Pyruvate carboxylase, mitochondrial                                                 | Mus musculus |
| Q92ZQ6 | Sept5_Pntu11                     | 0.56  | -0.83  | 0.0021      | 20.7624795  | 1  | 15   | 16   | 42.7                                                                 | Septin-5                                                                            | Mus musculus |
| Q9Z0E0 | Ncdn_Kiaa0607_Sfap75             | 0.56  | -0.83  | 3E-07       | 12.99659918 | 4  | 33   | 39   | 78.9                                                                 | Nebuchondrin                                                                        | Mus musculus |
| P97452 | Bop1_Kiaa0124                    | 0.56  | -0.83  | 0.0235      | 23.04880837 | 1  | 7    | 7    | 82.5                                                                 | Ribosome biogenesis protein BOP1                                                    | Mus musculus |
| Q91XU3 | Pip4k2c_Pip5k2c                  | 0.56  | -0.83  | 0.0078      | 22.11925412 | 2  | 11   | 13   | 47.3                                                                 | Phosphatidylinositol 5-phosphate 4-kinase type-2 gamma                              | Mus musculus |
| Q8CDG3 | Vcip1_Vcip135                    | 0.56  | -0.83  | 6E-05       | 17.7939022  | 4  | 30   | 32   | 134.5                                                                | Deubiquitinating protein VCIPI35                                                    | Mus musculus |
| Q8BH59 | Slc25a12_Aralar1                 | 0.56  | -0.84  | 3E-22       | 6.808851372 | 10 | 92   | 109  | 74.6                                                                 | Calcium-binding mitochondrial carrier protein Aralar1                               | Mus musculus |
| Q9QVY9 | Ndr3g_Ndr3                       | 0.56  | -0.84  | 0.0003      | 17.37774774 | 2  | 18   | 23   | 41.6                                                                 | Protein NDRG3                                                                       | Mus musculus |
| Q9CZ13 | Uqcrc1                           | 0.56  | -0.84  | 0.0457      | 33.94465964 | 3  | 13   | 16   | 52.9                                                                 | Cytochrome b-c1 complex subunit 1, mitochondrial                                    | Mus musculus |
| Q7TQD2 | Tppp                             | 0.56  | -0.84  | 5E-19       | 7.892112687 | 13 | 95   | 114  | 23.6                                                                 | Tubulin polymerization-promoting protein                                            | Mus musculus |
| P97441 | Slc30a3_Znt3                     | 0.56  | -0.84  | 0.0215      | 22.35798666 | 1  | 7    | 8    | 41.8                                                                 | Zinc transporter 3                                                                  | Mus musculus |
| O08788 | Detn1                            | 0.55  | -0.85  | 4E-36       | 5.419551124 | 18 | 157  | 186  | 141.7                                                                | Dynaectin subunit 1                                                                 | Mus musculus |
| A2AGT5 | Ckap5                            | 0.55  | -0.85  | 2E-17       | 8.398294525 | 13 | 90   | 103  | 225.6                                                                | Cytoskeleton-associated protein 5                                                   | Mus musculus |
| Q76MZ3 | Wpp2r1a                          | 0.55  | -0.85  | 8E-14       | 9.25244293  | 7  | 39   | 48   | 65.3                                                                 | Serine/threonine-protein phosphatase 2A 65 kDa regulatory subunit A alpha isoform   | Mus musculus |
| P32921 | Wars_Wrs                         | 0.55  | -0.86  | 0.0063      | 23.8282644  | 2  | 14   | 16   | 54.4                                                                 | Tryptophan-tRNA ligase, cytoplasmic                                                 | Mus musculus |
| Q3TXS7 | Psmc1                            | 0.55  | -0.86  | 0.0053      | 23.76258668 | 3  | 16   | 19   | 105.7                                                                | 26S proteasome non-ATPase regulatory subunit 1                                      | Mus musculus |
| P68372 | Tubbb4b_Tubbb2c                  | 0.55  | -0.87  | 2E-15       | 9.124449919 | 7  | 82   | 90   | 49.8                                                                 | Tubulin beta-4B chain                                                               | Mus musculus |
| A6HSZ3 | Exoc6b_Sec15b_Sec1512            | 0.55  | -0.87  | 6E-11       | 10.06208496 | 7  | 47   | 54   | 94.1                                                                 | Exocyst complex component 6B                                                        | Mus musculus |
| Q8BH57 | Wdr48_Kiaa1449_Uaf1f             | 0.55  | -0.87  | 0.0023      | 23.22394748 | 2  | 21   | 21   | 76.0                                                                 | WD repeat-containing protein 48                                                     | Mus musculus |
| O35098 | Dpysl4_Cmp3_Ulip4                | 0.54  | -0.88  | 8E-07       | 15.09470053 | 7  | 48   | 55   | 62.0                                                                 | Dihydropyrimidinase-related protein 4                                               | Mus musculus |
| Q3TPX4 | Exoc5_Sec101f                    | 0.54  | -0.89  | 9E-05       | 14.7032294  | 2  | 16   | 16   | 81.7                                                                 | Exocyst complex component 5                                                         | Mus musculus |
| P46471 | Psmc2_Mss1                       | 0.54  | -0.89  | 0.0003      | 16.81645404 | 1  | 16   | 16   | 48.6                                                                 | 26S proteasome regulatory subunit 7                                                 | Mus musculus |
| Q7TPD0 | Ints3                            | 0.54  | -0.89  | 0.0002      | 7.080698449 | 1  | 7    | 8    | 117.9                                                                | Integrator complex subunit 3                                                        | Mus musculus |
| Q9Z1Z0 | Uso1_Vdp                         | 0.54  | -0.90  | 0.0235      | 23.01956622 | 1  | 7    | 7    | 107.0                                                                | General vesicular transport factor p115                                             | Mus musculus |
| Q8BQ01 | Vipas39_Spe39_Vipar              | 0.54  | -0.90  | 0.0027      | 20.15999544 | 2  | 13   | 17   | 56.6                                                                 | Spermatogenesis-defective protein 39 homolog                                        | Mus musculus |
| Q7TMM9 | Tubbb2a_Tubbb2                   | 0.53  | -0.91  | 4E-14       | 8.346312628 | 5  | 54   | 64   | 49.9                                                                 | Tubulin beta-2A chain                                                               | Mus musculus |
| Q9CR62 | Slc25a11                         | 0.53  | -0.91  | 2E-05       | 17.94373952 | 5  | 42   | 44   | 34.2                                                                 | Mitochondrial 2-oxoglutarate/malate carrier protein                                 | Mus musculus |
| P13707 | Gpd1_Gdc-1_Gdc1_Kiaa4010         | 0.53  | -0.91  | 0.0232      | 22.93560675 | 1  | 7    | 8    | 37.6                                                                 | Glycerol-3-phosphate dehydrogenase [NAD(+)], cytoplasmic                            | Mus musculus |
| Q8C3K6 | Slc5a1                           | 0.53  | -0.92  | 0.0345      | 27.99532286 | 1  | 8    | 8    | 73.4                                                                 | Sodium/glucose cotransporter 1                                                      | Mus musculus |
| P31938 | Map2k1_Mek1_Prkmk1               | 0.53  | -0.92  | 6E-09       | 8.889779755 | 4  | 25   | 28   | 43.5                                                                 | Dual specificity mitogen-activated protein kinase kinase 1                          | Mus musculus |
| Q91WD5 | Ndufs2                           | 0.53  | -0.92  | 0.0221      | 24.77984025 | 1  | 8    | 12   | 52.6                                                                 | NADH dehydrogenase [ubiquinone] iron-sulfur protein 2, mitochondrial                | Mus musculus |
| Q80UM3 | Naa15_Narg1_Nat1_Tbdn-1_Tubedown | 0.53  | -0.93  | 0.0068      | 18.43638905 | 1  | 8    | 8    | 101.0                                                                | N-alpha-acetyltransferase 15, NatA auxiliary subunit                                | Mus musculus |
| Q60676 | Ppps5c                           | 0.53  | -0.93  | 0.0185      | 23.62100568 | 1  | 8    | 8    | 56.9                                                                 | Serine/threonine-protein phosphatase 5                                              | Mus musculus |
| Q92ZV5 | Hdac6                            | 0.53  | -0.93  | 0.0284      | 30.37954409 | 2  | 12   | 18   | 125.8                                                                | Histone deacetylase 6                                                               | Mus musculus |
| P60670 | Nploc4_Kiaa1499_Npl4             | 0.52  | -0.93  | 0.0284      | 21.30846203 | 1  | 6    | 6    | 68.0                                                                 | Nuclear protein localization protein 4 homolog                                      | Mus musculus |
| Q9QXK3 | Copg2                            | 0.52  | -0.93  | 0.0413      | 24.20678602 | 1  | 6    | 8    | 97.7                                                                 | Cotomer subunit gamma-2                                                             | Mus musculus |
| Q9DB60 | Fam213b                          | 0.52  | -0.94  | 0.0345      | 28.00063586 | 1  | 8    | 8    | 21.7                                                                 | Prostaglandin/prostaglandin F synthase                                              | Mus musculus |
| Q8C1B7 | Sept11_D5ErtD60e                 | 0.52  | -0.94  | 3E-11       | 8.802837108 | 5  | 37   | 40   | 49.7                                                                 | Septin-11                                                                           | Mus musculus |
| P68368 | Tubaa4_Tuba4                     | 0.52  | -0.94  | 3E-20       | 8.202020514 | 12 | 127  | 143  | 49.9                                                                 | Tubulin alpha-4A chain                                                              | Mus musculus |
| P99028 | Uqcrc                            | 0.51  | -0.96  | 0.0002      | 7.14842087  | 1  | 7    | 8    | 10.4                                                                 | Cytochrome b-c1 complex subunit 6, mitochondrial                                    | Mus musculus |
| O08553 | Dpysl2_Cmp2_Ulip2                | 0.51  | -0.96  | 7E-49       | 4.677115465 | 29 | 214  | 253  | 62.3                                                                 | Dihydropyrimidinase-related protein 2                                               | Mus musculus |
| Q9DCJ5 | Ndufa8                           | 0.51  | -0.97  | 3E-17       | 8.46770011  | 7  | 89   | 100  | 20.0                                                                 | NADH dehydrogenase [ubiquinone] 1 alpha subcomplex subunit 8                        | Mus musculus |
| P05064 | Aldoa_Aldo1                      | 0.51  | -0.98  | 0.0058      | 17.81431718 | 2  | 9    | 11   | 39.4                                                                 | Fructose-bisphosphate aldolase A                                                    | Mus musculus |
| O08599 | Stxbp1                           | 0.51  | -0.98  | 9E-38       | 5.828061239 | 24 | 216  | 237  | 67.6                                                                 | Syntaxin-binding protein 1                                                          | Mus musculus |
| Q9C0S4 | Ndufc2                           | 0.51  | -0.98  | 8E-09       | 10.49925756 | 4  | 32   | 39   | 14.2                                                                 | NADH dehydrogenase [ubiquinone] 1 subunit C2                                        | Mus musculus |
| P23116 | Eif3a_Csma_Eif3_Eif3s10          | 0.50  | -0.99  | 9E-07       | 14.46573521 | 6  | 39   | 43   | 162.9                                                                | Eukaryotic translation initiation factor 3 subunit A                                | Mus musculus |
| Q8VCM4 | Lip1                             | 0.50  | -0.99  | 0.0021      | 12.05548518 | 1  | 7    | 8    | 42.1                                                                 | Lipoyltransferase 1, mitochondrial                                                  | Mus musculus |
| Q9Z1S5 | Sept3_Sept3                      | 0.50  | -1.00  | 0.0002      | 6.68502137  | 1  | 7    | 8    | 40.0                                                                 | Neuronal-specific septin-3                                                          | Mus musculus |
| Q6PGL7 | Fam21_D6Wsu116e_Kiaa0592         | 0.50  | -1.00  | 7E-07       | 13.41536004 | 4  | 32   | 37   | 145.3                                                                | WASH complex subunit 2                                                              | Mus musculus |
| Q8BH66 | Atl1_Spg3a                       | 0.50  | -1.00  | 6E-06       | 14.76347878 | 4  | 28   | 31   | 63.4                                                                 | ATSL1-1                                                                             | Mus musculus |
| Q9JR11 | Sfn1_F                           | 0.50  | -1.00  | 0.0242      | 25.45033434 | 1  | 8    | 8    | 35.6                                                                 | Sideroflexin-1                                                                      | Mus musculus |
| P62192 | Psmc1                            | 0.50  | -1.01  | 2E-17       | 7.722487515 | 11 | 72   | 82   | 49.2                                                                 | 26S proteasome regulatory subunit 4                                                 | Mus musculus |
| Q8R366 | Igsb_Ewi2_Kct4_Pgrl              | 0.50  | -1.01  | 0.0492      | 28.87179353 | 1  | 7    | 7    | 65.0                                                                 | Immunoglobulin superfamily member 8                                                 | Mus musculus |
| Q9J9P0 | Map4k3                           | 0.49  | -1.02  | 0.0073      | 25.55208399 | 2  | 16   | 16   | 101.1                                                                | Mitogen-activated protein kinase kinase kinase 3                                    | Mus musculus |
| Q9JKY5 | Hip1r                            | 0.49  | -1.02  | 4E-09       | 8.640175282 | 4  | 25   | 26   | 119.4                                                                | Huntingtin-interacting protein 1-related protein                                    | Mus musculus |
| O55125 | Nipsnap1                         | 0.49  | -1.03  | 6E-05       | 12.88180723 | 2  | 14   | 15   | 33.4                                                                 | Protein NipSnap homolog 1                                                           | Mus musculus |
| Q9DBP5 | Cmpk1_Cmk_Cmpk_Uck_Umk_Umpk      | 0.49  | -1.03  | 0.0151      | 25.34492994 | 2  | 11   | 12   | 22.2                                                                 | UMP-CMP kinase                                                                      | Mus musculus |
| Q9JME5 | Ap3b2                            | 0.49  | -1.03  | 2E-12       | 9.861604817 | 7  | 59   | 63   | 119.2                                                                | AP-3 complex subunit beta-2                                                         | Mus musculus |
| Q8K2B3 | Stha                             | 0.49  | -1.03  | 2E-16       | 5.849849384 | 6  | 41   | 54   | 72.6                                                                 | Succinate dehydrogenase [ubiquinone] flavoprotein subunit, mitochondrial            | Mus musculus |
| Q9Z219 | Sucla2                           | 0.49  | -1.03  | 3E-20       | 7.305515844 | 13 | 90   | 98   | 50.1                                                                 | Succinate-CoA ligase [ADP-forming] subunit beta, mitochondrial                      | Mus musculus |
| Q80UP3 | Dgkz                             | 0.49  | -1.04  | 0.0062      | 27.11724354 | 4  | 25   | 31   | 104.0                                                                | Diallylglycerol kinase zeta                                                         | Mus musculus |
| Q8QZT1 | Acat1                            | 0.48  | -1.06  | 7E-14       | 8.587501822 | 9  | 57   | 70   | 44.8                                                                 | Acetyl-CoA acetyltransferase, mitochondrial                                         | Mus musculus |
| Q801T1 | Cadps_Caps_Caps1_Kiaa1121        | 0.48  | -1.07  | 8E-08       | 12.31475451 | 5  | 36   | 40   | 153.1                                                                | Calcium-dependent secretion activator 1                                             | Mus musculus |
| Q9CQC7 | Ndufb10                          | 0.48  | -1.07  | 8E-10       | 11.67225517 | 8  | 55   | 62   | 15.1                                                                 | NADH dehydrogenase [ubiquinone] 1 beta subcomplex subunit 4                         | Mus musculus |
| Q9JHU4 | Dync1h1_Dhcl1_Dhchl1_Dhchl1_Dyhc | 0.48  | -1.07  | 3E-52       | 4.826459936 | 39 | 280  | 346  | 532.0                                                                | Cytoplasmic dynein 1 heavy chain 1                                                  | Mus musculus |
| O55131 | Sept7_Cdel10                     | 0.47  | -1.08  | 3E-18       | 6.512682631 | 6  | 56   | 61   | 5.5                                                                  | Septin-7                                                                            | Mus musculus |
| Q99K10 | Aco2                             | 0.47  | -1.08  | 1E-06       | 16.52980855 | 12 | 73   | 86   | 85.5                                                                 | Aconitate hydratase, mitochondrial                                                  | Mus musculus |
| P62827 | Ran_Ras12-8                      | 0.47  | -1.09  | 2E-05       | 13.79563903 | 3  | 20   | 24   | 24.4                                                                 | GTP-binding nuclear protein Ran                                                     | Mus musculus |
| O55143 | Atip1_Atpi1f                     | 0.47  | -1.09  | 4E-05       | 15.98003199 | 3  | 23   | 24   | 12.2                                                                 | ATPase inhibitor, mitochondrial                                                     | Mus musculus |
| P57746 | Atp6v1d_Atp6m_Vatd               | 0.47  | -1.09  | 6E-06       | 8.977145815 | 2  | 14   | 20   | 28.4                                                                 | V-type proton ATPase subunit D                                                      | Mus musculus |
| Q91V61 | Sfn3                             | 0.47  | -1.10  | 5E-21       | 6.686427514 | 11 | 80   | 90   | 35.4                                                                 | Sideroflexin-3                                                                      | Mus musculus |
| Q91V92 | Acly                             | 0.46  | -1.10  | 0.011       | 20.73857494 | 1  | 8    | 8    | 119.7                                                                | ATP-citrate synthase                                                                | Mus musculus |
| Q80VY9 | Dhx33                            | 0.46  | -1.11  | 0.0076      | 18.98221241 | 1  | 8    | 8    | 78.3                                                                 | Putative ATP-dependent RNA helicase DHX33                                           | Mus musculus |
| Q9JIG7 | Ccd22_DMX40e                     | 0.46  | -1.11  | 0.0128      | 24.44748484 | 1  | 11   | 11   | 70.8                                                                 | Coiled-coil domain-containing protein 22                                            | Mus musculus |
| Q148V7 | Kiaa1468                         | 0.46  | -1.12  | 0.006       | 24.74947585 | 2  | 16   | 16   | 134.6                                                                | RAB11-binding protein RELCH                                                         | Mus musculus |
| Q91VD9 | Ndufs1                           | 0.46  | -1.13  | 6E-09       | 9.859837859 | 4  | 29   | 32   | 79.8                                                                 | NADH-ubiquinone oxidoreductase 75 kDa subunit, mitochondrial                        | Mus musculus |
| Q9D172 | D10Ihu81e                        | 0.45  | -1.15  | 5E-05       | 12.44316736 | 2  | 14   | 22   | 28.1                                                                 | Glutamine amidotransferase-like class 1 domain-containing protein 3A, mitochondrial | Mus musculus |
| Q9D6R2 | Ildh3a                           | 0.45  | -1.15  | 3E-05       | 12.28838062 | 2  | 15   | 16   | 39.6                                                                 | Isoactate dehydrogenase [NAD] subunit alpha, mitochondrial                          | Mus musculus |
| Q8QZY1 | Eif3l_Eif3eip_Eif3s6ip_Pa67      | 0.45  | -1.15  | 0.0012      | 15.84824927 | 2  | 11   | 14   | 66.6                                                                 | Eukaryotic translation initiation factor 3 subunit L                                | Mus musculus |
| Ndufs3 | 0.45                             | -1.16 | 0.0002 | 14.67644467 | 2           | 14 | 16   | 30.1 | NADH dehydrogenase [ubiquinone] iron-sulfur protein 3, mitochondrial | Mus musculus                                                                        |              |
| P70404 | Ildh3g                           | 0.45  | -1.16  | 2E-13       | 6.909205943 | 6  | 36   | 44   | 42.8                                                                 | Isoactate dehydrogenase [NAD] subunit gamma 1, mitochondrial                        | Mus musculus |
| Q9EOH3 | Vps35_Mem3                       | 0.45  | -1.17  | 0.0001      | 8.081625795 | 1  | 8    | 8    | 91.7                                                                 | Vacuolar protein sorting-associated protein 35                                      | Mus musculus |
| Q9WMT5 | Ruvbl2                           | 0.44  | -1.17  | 0.007       | 18.61019626 | 1  | 8    | 8    | 51.1                                                                 | RuvB-like 2                                                                         | Mus musculus |
| Q9WTL7 | Lyp1a2                           | 0.44  | -1.18  | 0.0484      | 30.80502895 | 1  | 8    | 8    | 24.8                                                                 | Acyl-protein thioesterase 2                                                         | Mus musculus |
| E9QP71 | Col22a1                          | 0.44  | -1.19  | 0.0467      | 30.48981953 | 1  | 8    | 8    | 159.9                                                                | Collagen, type XXII, alpha 1                                                        | Mus musculus |
| P10637 | Mapt_Mtapt_Tau                   | 0.43  | -1.20  | 8E-85       | 3.143184771 | 32 | 281  | 351  | 76.2                                                                 | Microtubule-associated protein tau                                                  | Mus musculus |
| Q6PGF7 | Exoc8                            | 0.43  | -1.21  | 0.0097      | 24.15628412 | 2  | 12   | 12   | 81.0                                                                 | Exocyst complex component 8                                                         | Mus musculus |
| Q9EQZ6 | Ragep4_Cgef2_Epac2               | 0.43  | -1.21  | 6E-05       | 17.02951353 | 4  | 27   | 34   | 115.5                                                                | Rap guanine nucleotide exchange factor 4                                            | Mus musculus |
| Q9R1T4 | Sept6_Kiaa0128                   | 0.43  | -1.23  | 2E-09       | 9.660786628 | 3  | 31</ |      |                                                                      |                                                                                     |              |

|        |                        |      |          |        |             |    |     |     |       |                                                                                                 |              |
|--------|------------------------|------|----------|--------|-------------|----|-----|-----|-------|-------------------------------------------------------------------------------------------------|--------------|
| Q99J4  | Psm6                   | 0.36 | -1.47    | 0.001  | 12.16217157 | 1  | 8   | 8   | 45.5  | 26S proteasome non-ATPase regulatory subunit 6                                                  | Mus musculus |
| Q0447  | Ckb,Ckbb               | 0.36 | -1.49    | 1E-06  | 14.70142888 | 4  | 37  | 38  | 42.7  | Creatine kinase B-type                                                                          | Mus musculus |
| Q8R1Q8 | Dync1l1,Dncli1,Dnelic1 | 0.35 | -1.52    | 3E-27  | 6.316369756 | 17 | 122 | 141 | 56.6  | Cytoplasmic dynein 1 light intermediate chain 1                                                 | Mus musculus |
| P16125 | Ldhh,Ldh-2,Ldh2        | 0.34 | -1.54    | 0.0003 | 19.82509339 | 5  | 28  | 30  | 36.6  | L-lactate dehydrogenase B chain                                                                 | Mus musculus |
| P19536 | Cox5b                  | 0.34 | -1.54    | 0.0011 | 18.94425009 | 2  | 15  | 17  | 13.8  | Cytochrome c oxidase subunit 5B, mitochondrial                                                  | Mus musculus |
| P00405 | Mtco2,COII,mt-Co2      | 0.34 | -1.56    | 0.034  | 25.69423741 | 1  | 7   | 7   | 26.0  | RecName: Full=Cytochrome c oxidase subunit 2; AltName: Full=Cytochrome c oxidase polypeptide II | Mus musculus |
| Q9DB77 | Uqcrc2                 | 0.33 | -1.59    | 2E-32  | 4.604020521 | 12 | 92  | 103 | 48.2  | Cytochrome b-c1 complex subunit 2, mitochondrial                                                | Mus musculus |
| Q9QZ39 | St6galnac1,Siat7a      | 0.33 | -1.60    | 0.0139 | 16.63935763 | 1  | 6   | 8   | 60.7  | Alpha-N-acetylgalactosaminide alpha-2,6-sialyltransferase 1                                     | Mus musculus |
| P02538 | KRT6A,K6A,KRT6D        | 0.32 | -1.62    | 0.0085 | 25.14314213 | 2  | 14  | 15  | 60.0  | SWISS-PROT:P02538 Tax_Id=9606 Gene_Symbol=KRT6A Keratin, type II cytoskeletal 6A                | Homo sapiens |
| Q9ERS2 | Ndufa13,Grim19         | 0.32 | -1.65    | 0.0001 | 8.36774246  | 1  | 8   | 8   | 16.9  | NADH dehydrogenase [ubiquinone] 1 alpha subcomplex subunit 13                                   | Mus musculus |
| P97494 | Gclc,Glecl             | 0.32 | -1.66    | 0.0158 | 20.48613506 | 1  | 7   | 7   | 72.6  | Glutamate-cysteine ligase catalytic subunit                                                     | Mus musculus |
| Q9D855 | Uqerb                  | 0.31 | -1.68    | 0.0003 | 16.84214096 | 2  | 16  | 16  | 13.5  | Cytochrome b-c1 complex subunit 7                                                               | Mus musculus |
| Q91YD6 | Vill,Villp             | 0.30 | -1.75    | 0.0035 | 10.78457924 | 1  | 6   | 6   | 96.5  | Villin-like protein                                                                             | Mus musculus |
| Q8VDD8 | Wash1,Orf19,Wash       | 0.29 | -1.79    | 0.0472 | 28.47041997 | 1  | 7   | 7   | 51.7  | WASH complex subunit 1                                                                          | Mus musculus |
| Q9CZU6 | Cs                     | 0.29 | -1.81    | 0.0369 | 26.36500118 | 1  | 7   | 8   | 51.7  | Citrate synthase, mitochondrial                                                                 | Mus musculus |
| P39053 | Dnm1,Dnm,Kiaa4093      | 0.28 | -1.84    | 5E-49  | 3.93828611  | 17 | 149 | 175 | 97.8  | Dynamin-1                                                                                       | Mus musculus |
| P30275 | Ckmt1                  | 0.26 | -1.94    | 0.001  | 17.37702734 | 2  | 13  | 16  | 47.0  | Creatine kinase U-type, mitochondrial                                                           | Mus musculus |
| O88935 | Syn1,Syn-1             | 0.24 | -2.03    | 4E-85  | 2.735557626 | 28 | 226 | 275 | 74.1  | Synapsin-1                                                                                      | Mus musculus |
| Q14B24 | Prss57,Prss1           | 0.15 | -2.70    | 0.0007 | 6.688053346 | 1  | 6   | 7   | 30.3  | Serine protease 57                                                                              | Mus musculus |
| P56695 | Wfs1                   | 0.00 | -1000.00 |        |             | 2  | 4   | 4   | 100.6 | Wolfamin                                                                                        | Mus musculus |
| P21619 | Lmb2                   | 0.00 | -1000.00 |        |             | 3  | 3   | 3   | 67.3  | Lamin-B2                                                                                        | Mus musculus |
| P97807 | Fh,Fh1                 | 0.00 | -1000.00 |        |             | 1  | 3   | 3   | 54.4  | Fumarate hydratase, mitochondrial                                                               | Mus musculus |
| Q8C181 | Mbnl2,Kiaa4072         | 0.00 | -1000.00 |        |             | 1  | 3   | 3   | 40.2  | Muscleblind-like protein 2                                                                      | Mus musculus |
| Q8K021 | Scamp1                 | 0.00 | -1000.00 |        |             | 1  | 3   | 3   | 38.0  | Secretory carrier-associated membrane protein 1                                                 | Mus musculus |
| Q9CPP6 | Ndufa5                 | 0.00 | -1000.00 |        |             | 1  | 3   | 3   | 13.4  | NADH dehydrogenase [ubiquinone] 1 alpha subcomplex subunit 5                                    | Mus musculus |

**Extended Table 4. List of the Cx30 protein partners.** Analysis of the changing Cx30 interactors in WT vs KD mice. In WT cells 100 proteins were enriched or unique compared to KD cells (with the following parameters: number of peptides  $\geq 3$ , ratio  $\geq 1.5$  and p-value  $\leq 0.05$ ), while in Cx30 KD cells, 261 proteins were enriched or unique ( $\log_2$  ratio = -1000) compared to WT cells (with the following parameters: number of peptides  $\geq 3$ , ratio  $\geq 1/1.5$  and P-value  $\leq 0.05$ ). WT and KD proteins are highlighted in red and green, respectively. Proteins from the pathway Rho-GTPase activate ROCK are indicated for WT (bold green, Myosin 14) and KD (bold red, Rock2) samples.

## Supplementary Information for

### **Astrocytes close the critical period for visual plasticity**

Jérôme Ribot<sup>1‡</sup>, Rachel Breton<sup>1,2,3‡#</sup>, Charles-Félix Calvo<sup>1</sup>, Julien Moulard<sup>1,4</sup>, Pascal Ezan<sup>1</sup>, Jonathan Zapata<sup>1</sup>, Kevin Samama<sup>1</sup>, Alexis-Pierre Bemelmans<sup>5</sup>, Valentin Sabatet<sup>6</sup>, Florent Dingli<sup>6</sup>, Damarys Loew<sup>6</sup>, Chantal Milleret<sup>1</sup>, Pierre Billuart<sup>7</sup>, Glenn Dallérac<sup>1‡#</sup>, Nathalie Rouach<sup>1‡\*</sup>

\*Correspondence to:

[nathalie.rouach@college-de-france.fr](mailto:nathalie.rouach@college-de-france.fr)

**This PDF file includes:**

Supplementary Methods

## Methods

**Animals.** All procedures on animals were performed according to the guidelines of European Community Council Directives of 01/01/2013 (2010/63/EU) and our local animal welfare committee (Center for Interdisciplinary Research in Biology in College de France, certificate A751901, Ministère de l'Agriculture et de la Pêche). Experiments were carried out using mice of wild type (WT) C57BL/6j background, mice expressing enhanced green fluorescent protein under the astrocytic promoter aldehyde dehydrogenase 1 family member L1 (Aldh1l1-eGFP)<sup>1</sup> (JAX stock #026033), as well as constitutive knockout mice for Cx30 which were previously characterized<sup>2</sup> and an astroglial conditional knockdown mouse line for Cx30 that we generated (hGFAP-Cre-Cx30<sup>fl/fl</sup>, named KD). Animals were group housed on a 12 h light/dark cycle. All mice were backcrossed to the C57BL/6J background. Mice of both genders and littermates were used. All efforts were made to minimize the number of animals used and their suffering.

**Generation of Cx30 knockdown mice.** Astroglial Cx30 knockdown mice (KD) were generated by crossing the hGFAP-cre line constitutively expressing the cre recombinase transgene driven by the human astrocytic glial fibrillary acidic protein (hGFAP) promoter<sup>3</sup> (JAX stock #004600) with Cx30<sup>fl/fl</sup> line containing cre-excisable loxP sequences in the endogenous *Gjb6* gene<sup>2</sup>.

**Primary astrocytes cultures.** Primary cortical astrocyte cultures were prepared as previously described<sup>4</sup>. Briefly, brains were removed (either P1-P3 pups, or P19 mice) and caudal cortices (therefore enriched in visual cortex material) were dissected in cold PBS-glucose (33 mM). Meninges were carefully removed and P1-P3 cortices were mechanically dissociated with Pasteur pipette in PBS-glucose to obtain single cell suspension. For P19 animals, caudal cortices were dissected, treated with papain (0.8 mg/ml; Worthington) for 30 min at 37°C and washed, then mechanically dissociated in PBS containing 5% FCS, 0.3% glucose and 5mM HEPES to obtain a single cell suspension. These dissociated single cell preparations were transduced with a HIV-1-derived lentivirus vector expressing GFP under the control of the PGK ubiquitous promoter (LV-PGK-GFP). Lentiviral particles were produced by transient transfection of HEK-293T cells with a three plasmids system and vector titers were quantified using an ELISA assay of p24 antigen (Gentaur, France), both as previously described<sup>5</sup>. Infection was performed in DMEM containing 5% SVF, 100ng of viral particles were added to 10<sup>6</sup> cells for 3 hours at 37°C. The suspension of infected cells was then directly seeded on polyornithine-coated glass coverslips or petri dishes (0.1 mg/ml) in DMEM containing 10% heat-inactivated FCS, 100 U/ml penicillin/streptomycin (GIBCO) and incubated at 37°C, 5% CO<sub>2</sub>. 24 hours after transduction, the medium was replaced. After one week, once cells have reached confluency, 1 μM of cytosine-beta-D-arabino-furanoside was added to the cell culture for 2 days, to eliminate proliferating microglial cells. Medium was then changed every 3 days and astrocytes were used after 10 days in culture (10DIV). For immunocytochemistry, cells were fixed with 4% PFA and washed twice in PBS before proceeding with immunostaining. For intracerebral injection, the culture was washed with PBS, then incubated with trypsin 0.25 EDTA% (Invitrogen) for

5 to 10 min at 37°C. The harvested cells were collected in fresh DMEM 5% SVF and incubated for 2 hours at 37°C, to allow cell recovery.

**Recombinant adeno-associated virus (rAAV) generation.** For rAAV *in vivo* gene transfer, a transgene composed of GFP cDNA was placed under the control of a GFAP-specific promoter in a rAAV shuttle plasmid containing the inverted terminal repeats (ITR) of AAV2 (AAV-GFAP-GFP). Pseudotyped serotype 9 rAAV particles were produced by transient co-transfection of HEK-293T cells, as previously described<sup>6</sup>. Viral titers were determined by quantitative PCR amplification of the ITR on DNase-resistant particles and expressed as vector genome per ml (vg/ml).

**Stereotaxic intracerebral injections.** Animals were anaesthetized i.p. with a mix of ketamine (95mg/kg) and xylazine (12mg/kg) in 0.9 % NaCl and fitted into a stereotaxic frame (David Kopf Instruments). For cells injection, a 2 $\mu$ l-gauge Hamilton syringe adapted to KDS100 pump (Kd Scientific) was linked to a glass capillary (Harvard apparatus, 30-0041) that was surgically implanted in the right visual cortex area with the following coordinates to the Lambda: antero- posterior 0, medio-lateral + 2.8 and dorso-ventral - 0.5 mm. A maximum of 1.5 $\mu$ l of cell suspension (20 x10<sup>4</sup> cells) in DMEM containing 0.25% SVF was infused at a flow rate of 0.2  $\mu$ l/min. Control animals were injected the same way with 1.5 $\mu$ l of medium. After the injection, the capillary was left in place for 5 min and then slowly withdrawn. Alternatively for *in vivo* cell labeling, 1 $\mu$ l of rAAV2/9-GFAP-eGFP (diluted in PBS at a concentration of 1x10<sup>10</sup> vg/ $\mu$ l) was unilaterally injected in the right visual cortex at the rate of 0.2 $\mu$ l/min using the same coordinates from Bregma mentioned above. The injection was performed using 29-gauge blunt-tip needle connected to 2 $\mu$ l Hamilton syringe and the injection rate was controlled by syringe pump (KD Scientific). After the injection, the needle was left in place for 5 min and then slowly withdrawn. Following surgery, mice were allowed to recover from anesthesia on a heating pad and monitored for the next 24h.

**Gene Ontology and enrichment analyzes of transcriptomic data.** Comparing microarray data from P30 to P7 astrocytes (GEO#: GSE9566/platform#: GPL1261) using Geo2R analyzes (<https://www.ncbi.nlm.nih.gov/info/geo2r.html>)<sup>7</sup> allowed to identify differentially expressed genes between the two stages. Using a cut-off of 5 fold-change, about 200 up and down-regulated genes were analyzed for enrichment using their Gene Ontology assignment (GOtermFinder: <https://go.princeton.edu/cgi-bin/GOTermFinder?>). Process and Component GO options were selected respectively for the down and up DEG groups. Finally GO results were Visualized using ReViGO (<http://revigo.irb.hr/>).

**Antibodies, immunohistochemistry and immunoblotting.** All the antibodies used in this study are commercially available and have been validated in previous studies, as reported by the suppliers. The following primary antibodies were used: Cx30 rabbit polyclonal (1:500, 71-2200, Zymed), Cx43 mouse monoclonal (1:500, 610061 BD Biosciences), GFAP mouse monoclonal (1:500, G3893, Sigma-Aldrich), chick anti GFP (1:500, AB13970, Abcam), Parvalbumin mouse monoclonal (1:500, 235, SWANT), MMP9 rabbit (1:500, 3852, cell signaling), anti-active RhoA mouse monoclonal (1:500, 26904, NewEast Biosciences),

Lectin from *Wisteria Floribunda*, biotin conjugate (1:500, L1516-2MG, Sigma-Aldrich). The following fluorescent dye-conjugated secondary antibodies were used in appropriate combinations: goat anti-mouse IgG conjugated to Alexa 555 (1:2000, A-21424, Thermo Fisher), goat anti-rabbit IgG conjugated to Alexa 647 (1:2000, A-21245 Thermo Fisher), goat anti-chicken Ig conjugated to Alexa 488 (1:2000, A-11039, Thermo Fisher), Streptavidin Alexa fluor 488 (1:2000, S11223, Molecular Probes).

Immunohistochemistry and quantifications were performed as follows. Briefly, animals anesthetized with lethal dose of Doletal (150 $\mu$ l /10g), were perfused by intracardiac with PBS first and 2% paraformaldehyde (PFA). The brains were carefully removed for an overnight post-fixation in the same fixative, followed by transfer in 30% sucrose for cryoprotection. Brain coronal microtome sections (40 $\mu$ m thick) were collected in PBS and pre-incubated 1 h with PBS-1% gelatin in the presence of 0.25% Triton-X100 (PGT). Brain sections were then stained overnight at 4°C with primary antibodies and washed in PGT three times. Appropriate secondary antibodies with DAPI (1:200, D9564, Sigma-Aldrich) were finally applied for 2 hours at room temperature. After several washes in PBS, brain slices were mounted in Fluoromount (Clinisciences) and examined with an inverted confocal laser-scanning microscope (Confocal Leica SP5 inverted). Stacks of consecutive confocal images taken with a 63x objective at 600-1000 nm intervals were acquired sequentially with two lasers (argon 488 nm and helium/neon 543 nm or 647 nm) and Z projections were reconstructed using image J software. Alternatively, primary astrocyte cultures were fixed at room temperature with 2% paraformaldehyde for 10 min, washed twice with PBS and incubated 1h with 5% non-immune goat serum (Zymed) in the presence of 0.25% Triton-X100 before proceeding as described above.

Quantifications of RhoA-GTP, WFA, MMP9, and Cx30 expression were performed with ImageJ software. WFA integrated density was determined using histogram-based thresholding method specifically around PV interneurons. RhoA-GTP and MMP9 fluorescence were evaluated by measuring the global mean intensity or the integrated density, respectively. The integrated density of Cx30 was quantified specifically in astrocytes labeled with GFP following infection with rAAV2/9-GFAP-eGFP, as described above. For the quantification of WFA, Aldh1l1 and Cx30 staining across cortical layers, confocal image stacks were acquired on four to five brain sections from each animal. Regions of interest (200 x 630 $\mu$ m) were randomly defined in V1 and gray values were averaged along the transversal axis (bin 1.5 $\mu$ m). Western blotting and quantification were performed as previously described<sup>8</sup>. Shortly, cells were collected with a folded pipette tip (200 $\mu$ l) in a small volume of PBS containing protease inhibitor cocktail (Euromedex), phosphatase inhibitors (Beta-glycerophosphate, 10 mM) and orthovanadate (1 mM), to which Laemmlli 5X buffer was added. Alternatively, visual cortex samples were isolated from acute slices of 400 $\mu$ m cut in cold ACSF 1X. The same protocol was applied for visual cortex tissue using SDS 2% instead of PBS. Samples were sonicated, boiled 5 min and loaded on 4-12% polyacrylamide gels. Proteins were separated by electrophoresis and transferred onto nitrocellulose membranes. Membranes were saturated with 5% fat-free dried milk in triphosphate buffer solution and incubated overnight at 4°C with primary antibodies. They were then washed and exposed to HRP-conjugated secondary antibodies: goat anti rabbit IgG (1:2500, CSA2115 Clinisciences), goat anti-mouse IgG (1:2500,

CSA2108). The HRP-conjugated primary anti-GAPDH antibody (1:10,000, G9295 Sigma-Aldrich) was used as loading control. Specific signals were revealed with the chemiluminescence detection kit (Western Lightning plus-ECL, NEL103E001EA, Perkin Elmer). Semi-quantitative densitometric analysis was performed after scanning the bands with the image J software.

### **Proteomics and Mass Spectrometry Analysis.**

*Sample Preparation.* Visual cortices of WT and Cx30KD mice were dissected from acute slices of 400  $\mu\text{m}$  cut in cold ACSF 1X with a vibratome (Leica VT1200S). Samples were prepared in a lysis buffer containing 0.32M sucrose, 5 mM HEPES, 10 mM  $\text{MgCl}_2$  and complete EDTA free, and centrifuged (8 min at 1700 g) at 4°C. The supernatant was incubated overnight with lectin from Wisteria Floribunda Agglutinin, biotin conjugate (1:500, L1516-2MG, Sigma-Aldrich) and anti-Cx30 biotinylated (using anti-Cx30 rabbit polyclonal 71-2200, Zymed and Biotinylation kit/Biotin conjugation kit ab201795, abcam) or - coupled with streptavidin beads (Immunoprecipitation Kit - Dynabeads Protein G, 10007D, Invitrogen). Then, the beads were washed with lysis buffer before mass spectrometry analysis. Two additional washes in 100  $\mu\text{L}$  of ABC buffer (25 mM  $\text{NH}_4\text{HCO}_3$ ) were performed keeping the beads in the magnet and with no incubation. Finally, beads were resuspended in 100  $\mu\text{L}$  of ABC buffer and digested by adding 0.20  $\mu\text{g}$  of trypsin/LysC (Promega) for 1 hour at 37 °C. Samples were then loaded onto homemade Tips packed with Empore™ C18 Extraction Disks (3M™ Discs 2215) for desalting. Peptides were eluted using 40/60 MeCN/H<sub>2</sub>O + 0.1% formic acid and vacuum concentrated to dryness.

*LC-MS/MS Analysis.* For the biotinylated WFA lectine pull down, liquid chromatography (LC) was performed with an RSLCnano system (Ultimate 3000, Thermo Scientific) coupled online to a Q Exactive HF-X with a Nanospray Flex ion source (Thermo Scientific). Peptides were first trapped on a C18 column (75  $\mu\text{m}$  inner diameter  $\times$  2 cm; nanoViper Acclaim PepMap™ 100, Thermo Scientific) with buffer A (2/98 MeCN/H<sub>2</sub>O in 0.1% formic acid) at a flow rate of 2.5  $\mu\text{L}/\text{min}$  over 4 min. Separation was then performed on a 50 cm  $\times$  75  $\mu\text{m}$  C18 column (nanoViper Acclaim PepMap™ RSLC, 2  $\mu\text{m}$ , 100Å, Thermo Scientific) regulated to a temperature of 50°C with a linear gradient of 2% to 30% buffer B (100% MeCN in 0.1% formic acid) at a flow rate of 300 nL/min over 91 min. MS full scans were performed in the ultrahigh-field Orbitrap mass analyzer in ranges  $m/z$  375-1500 with a resolution of 120 000 at  $m/z$  200. The top 20 intense ions were subjected to Orbitrap for further fragmentation via high energy collision dissociation (HCD) activation and a resolution of 15 000 with the AGC target set to  $10^5$  ions. We selected ions with charge state from 2+ to 6+ for screening. Normalized collision energy (NCE) was set at 27 and the dynamic exclusion of 40s.

For the Cx30 pull down, LC was performed as previously with an RSLCnano system (same trap column, column and buffers), coupled online to an Orbitrap Exploris 480 mass spectrometer (Thermo Scientific). Peptides were trapped onto a C18 column with buffer A at a flow rate of 3.0  $\mu\text{L}/\text{min}$  over 4 min. Separation was performed at a temperature of 40°C with a linear gradient of 3% to 29% buffer B at a flow rate of 300 nL/min over 91 min. MS full scans were performed in the ultrahigh-field Orbitrap mass analyzer in ranges  $m/z$  375-



1500 with a resolution of 120 000 at  $m/z$  200. The top 20 most intense ions were subjected to Orbitrap for further fragmentation via high energy collision dissociation (HCD) activation and a resolution of 15 000 with the AGC target set to 100%. We selected ions with charge state from 2+ to 6+ for screening. Normalized collision energy (NCE) was set at 30 and the dynamic exclusion of 40s.

*Data analysis.* For identification, the data were searched against the Mus Musculus Swiss-Prot database (UP 000000589 containing 17038 sequences) and also a databank of the common contaminants containing 245 sequences for the Cx30 pull downs using Sequest-HT through proteome discoverer (version 2.2). Enzyme specificity was set to trypsin and a maximum of two-missed cleavage sites were allowed. Oxidized methionine and N-terminal acetylation were set as variable modifications. Maximum allowed mass deviation was set to 10 ppm for monoisotopic precursor ions and 0.02 Da for MS/MS peaks. The resulting files were further processed using myProMS<sup>9</sup> v3.5 (<https://github.com/bioinfo-pf-curie/myproms>). FDR calculation used Percolator<sup>10</sup> and was set to 1% at the peptide level for the whole study. The label free quantification was performed by peptide Extracted Ion Chromatograms (XICs) computed with MassChroQ version 2.2.1<sup>11</sup>. For protein quantification, XICs from proteotypic peptides shared between compared conditions (TopN matching) and missed cleavages of peptides were used. Median and scale normalization was applied on the total signal to correct the XICs for each biological replicate. To estimate the significance of the change in protein abundance, a linear model (adjusted on peptides and biological replicates) based on two-tailed T-tests was performed and P-values were adjusted with a Benjamini-Hochberg FDR. Proteins from the biotinylated WFA lectine pull down with at least three total peptides in all replicates ( $n=3$ ), a 1.5-fold enrichment and an adjusted P-value  $< 0.05$  were considered significantly enriched in sample comparison. Unique proteins were considered with at least three total peptides in all replicates. Protein selected were further analyzed with Reactome pathway analysis (<https://reactome.org/PathwayBrowser/#TOOL=AT>,<sup>12</sup>). Considering the lack of functional annotation in Mus Musculus, protein pathways were retrieved from the mapping of selected proteins to Homo Sapiens.

**Electroretinography.** The changes in potentials induced by light flashes in the retinal tissue were recorded with a Siem Medical ERG system (Nîmes, France). The active electrode (a gold loop) was placed on the cornea, while reference and ground electrodes were placed subcutaneously above the skull and in the tail, respectively. Mice were dark-adapted prior to the experiment, being housed in a dark-room on the evening prior to the recordings. On the following day, mice were handled under dim red light to maintain dark adaptation. After pupil dilatation with a drop of atropine and anesthesia with an intraperitoneal injection of a mixture of ketamine + medetomidine hydrochloride, the mice were placed on a mobile platform with a heating pad, to maintain body temperature. Ophthalmic gel was applied on both eyes, to keep the cornea moist and favor electric contact with the active electrode. After placement of the electrodes, the platform was moved forward so that the head of the mice was inside of the Ganzfeld delivering the flashes. After a series of flashes of increasing intensity (from 20 mCd.s.m<sup>-2</sup> to 10 Cd. s.m<sup>-2</sup>), a background light of 25 Cd.m<sup>-2</sup> was applied for 15 minutes, to saturate the rod photoreceptors and light adapt the cones, and

flashes of 1 and 10 Cd.s.m<sup>-2</sup> were applied. The cone system was further tested using flicker stimuli delivered at 2, 10, 15 and 20 Hz, with the same 25 Cd.m<sup>-2</sup> background light.

**Monocular deprivation.** For monocular deprivation, mice were anesthetized i.p. with a mix of ketamine (95mg/kg) and xylazine (12mg/kg) in 0.9 % NaCl. The area surrounding the eye to be sutured was trimmed and wiped with 70% ethanol. Two mattress sutures were then placed and animals were checked daily to ensure sutures remained intact.

### **Intrinsic optical imaging.**

*Surgery.* Mice were anesthetized with urethane (1.2 g/kg, i.p.) and sedated with chlorprothixene (8 mg/kg, i.m.). Atropine (0.1 mg/kg) and dexamethasone (2 mg/kg) were injected subcutaneously. The animals were placed in a stereotaxic apparatus and the body temperature was maintained at 37°C. In some cases, a craniotomy was made over the visual cortex. The exposed area was then covered by agarose (2.5%) and a glass coverslip. In other cases, the skull was left intact and intrinsic signals were recorded directly through the skull. No difference was found between the two methods.

*Visual stimulation and optical imaging recording.* Visual cortical responses were recorded using imaging methods based on Fourier transform following periodic stimulation<sup>13,14</sup>. Visual stimuli were presented on a high refresh rate monitor placed 20 cm in front of the mouse. Stimulation consisted of a horizontal bar drifting downwards periodically at a period of 8 s in the binocular visual field of the recorded hemisphere (from +5° ipsilateral to +15° contralateral). Each eye was stimulated 5 times in alternance for 2 to 4 minutes. Intrinsic signals were recorded using a 1M60 CCD camera (Dalsa) with a 135x50 mm tandem lens (Nikon) configuration. After acquisition of the surface vascular pattern, the camera was focused 400 μm deeper. Intrinsic signals were acquired with a 700 nm illumination wavelength and frames stored at a rate of 10 Hz, after a 2x2 pixels spatial binning.

*Data analysis.* Retinotopic maps for each eye were computed offline. Prior to Fourier transform, the generalized indicator function<sup>15</sup> was applied to remove slow varying components independent of the stimulation. Retinotopic maps were calculated from the phase and magnitude components of the signal at the frequency of stimulation. For each eye, the five activity maps were averaged, filtered with a Gaussian kernel low-pass filter (3 pixels s.d.) and set with a cut-off threshold at 50% of the maximum response. This allowed defining the binocular zone as the intersection between the response regions of each eye. For each of the 5 repetitions, an OD value at each pixel in the binocular zone was then defined as  $(C-I)/(C+I)$ , calculated from the response amplitude from the contralateral (C) eye and the ipsilateral (I) eyes. OD values ranged from -1 to 1, with negative values representing an ipsilateral bias, and positive values a contralateral bias. From these 5 OD maps, the OD index was then computed as the average of the OD values in the binocular zone. The OD indexes of one animal were averaged for statistical comparisons between ages, strains and conditions.

**Slices preparation and electrophysiology.** After rapid extraction of the brain, coronal slices (400  $\mu\text{m}$ ) containing the visual cortex were cut by mean of a vibratome (Leica VT1200S) and allowed to recover for a minimum of 45 min at 30°C in a submerged chamber containing ACSF before recording. Slices were individually transferred in a recording chamber placed under a microscope (Slicescope SSPro1000) and continuously perfused (2 mL/min) with aCSF composed of (in mM): 119 NaCl, 2.5 KCl, 2.5 CaCl<sub>2</sub>, 1.3 MgSO<sub>4</sub>, 1 NaH<sub>2</sub>PO<sub>4</sub>, 26.2 NaHCO<sub>3</sub> and 11 glucose. For recording of spontaneous synaptic activity, layer 4 pyramidal neurons from the primary visual cortex were recorded by whole-cell patch clamp using 3-6 M $\Omega$  glass pipettes filled with (in mM): 144 potassium gluconate, 1 MgCl<sub>2</sub>, 10 HEPES, 0.5 EGTA (pH 7.4, 280 mOsm). Spontaneous excitatory or inhibitory postsynaptic potentials (sEPSCs or sIPSCs) were identified as inward and outward currents, respectively. Excitation-inhibition (E-I) balance was determined as described previously<sup>16,17</sup>. Briefly, electrical stimulations (10-100  $\mu\text{A}$ , 0.2 ms, 0.05 Hz) were applied in layer 2 of the visual cortex using a 1 M $\Omega$  monopolar glass pipette filled with aCSF. Under voltage-clamp, 5 trials were repeated for 5 holding potentials (-70mV to -50mV). Data were analysed off-line with Elphy (NeuroPSI-CNRS, Gif-sur-Yvette, France). The E-I balance determination is based on the continuous measurement of conductance dynamics during the full-time course of the stimulus-evoked synaptic response. Briefly, we performed post-hoc decomposition of postsynaptic current waveforms in excitatory and inhibitory conductances together with continuous estimation of the apparent reversal potential of the composite responses. This allows a somatic measurement of the E-I balance after dendritic integration of incoming excitation and inhibition<sup>17</sup>. In order to extract the excitatory and inhibitory conductance changes from the evoked synaptic currents, the neuron is considered as the point-conductance model of a single-compartment cell, described by the following general membrane equation:

$$C_m \frac{dV_m(t)}{dt} = -g_{leak}(V_m(t) - E_{leak}) - gE(t)(V_m(t) - E_{exc}) - gI(t)(V_m(t) - E_{inh}) + I_{inj}$$

where  $C_m$  denotes the membrane capacitance,  $I_{inj}$  the injected current,  $g_{leak}$  the leak conductance and  $E_{leak}$  the leak reversal potential.  $gE(t)$  and  $gI(t)$  are the excitatory and inhibitory conductances, with respective reversal potentials  $E_{exc}$  and  $E_{inh}$ . Evoked synaptic currents were measured and averaged for 5 holding potentials. IV curves were then calculated at all time points of the response. In IV curves for every possible delay ( $t$ ), the value of holding potential ( $V_h$ ) was corrected ( $V_{hc}$ ) from the ohmic drop due to leakage current through the access resistance ( $V_{hc}(t) = V_h(t) - I(t) \times R_s$ ). An average estimate of the input conductance waveform of the cell was calculated from the best linear fit (mean least square criterion) of the IV curve for each delay ( $t$ ) following the stimulation onset. Only cells showing a Pearson correlation coefficient for the IV linear regression higher than 0.95 between -90 and -40 mV were considered for calculation of the conductance change in the recorded pyramidal neuron, using the slope of the regression line. The synaptically-evoked global conductance term ( $g_T(t)$ ) was then measured by subtracting the resting conductance observed in the absence of stimulation (on a time window of 100 ms before electrical stimulation) from the input total conductance. The synaptic reversal potential of the synaptic conductance ( $E_{syn}(t)$ ) was taken as the voltage of the intersection between the IV curve

during the synaptic response and the IV curve at rest. Assuming that the evoked somatic conductance change reflects the composite synaptic input reaching the soma,  $E_{\text{syn}}(t)$  characterizes the stimulation-locked dynamics of the balance between excitation and inhibition. The global synaptic conductance ( $g_{\text{T}}(t)$ ) was further decomposed into two conductance components ( $g_{\text{E}}(t)$  and  $g_{\text{I}}(t)$ ) corresponding to the activation of excitatory and inhibitory synapses respectively, each associated with known and fixed reversal potentials: 0 mV for excitatory ( $E_{\text{exc}}$ ) and -80 mV for inhibitory conductance ( $E_{\text{inh}}$ ). Under our experimental conditions,  $E_{\text{syn}}(t)$  took any intermediate values between  $E_{\text{exc}}$  (0 mV) and  $E_{\text{inh}}$  (-80 mV) in such a way that the mathematical conditions of the simplification used to calculate  $g_{\text{I}}(t)$  and  $g_{\text{E}}(t)$  were fulfilled. For each component, excitatory and inhibitory, we calculated the conductance change as the mean averaged over a time window of 200 ms. The contribution of each component was expressed by the ratio of its integral value to that of global conductance change.

**Fasudil treatment.** Fasudil hydrochloride (F4660, LC laboratories, Boston, MA, USA) was prepared by diluting 5 mL of solution stock Fasudil 10X (1g Fasudil hydrochloride for 150 mL H<sub>2</sub>O) in 50 mL of water. The treatment was given for 4 weeks (from P20 to P50) in drinking water (ad libitum; around 3 mg/day/mouse). Drinking bottles were wrapped in aluminium to avoid phototoxicity and replaced every 2 days<sup>18</sup>.

**Statistical analysis.** All data are presented as mean  $\pm$  standard error of the mean (SEM) and  $n$  represent the number of independent replicates. All statistical analyses were performed with GraphPad Prism (GraphPad software, USA). Prior statistical comparison, the normality of the distributions were studied and appropriate parametric or nonparametric tests were used. Statistical significance between two groups was evaluated with a two-tailed t-test or Mann-Whitney test. Concerning within-group comparisons, statistical significance was determined with an ANOVA (One- or two-way) or a Kruskal-Wallis followed by post hoc tests (Tukey or Sidak post-hoc tests for the ANOVA; Dunn post-hoc test for Kruskal-Wallis). Appropriate sample sizes were based on best practices in the literature for each method as well as on ethical standards to minimize numbers of animals for experiments.

**Data availability.** We confirm that all relevant data are included in the paper and/or its supplementary information files. The mass spectrometry proteomics data have been deposited to the ProteomeXchange Consortium via the PRIDE<sup>19</sup> partner repository with the dataset identifier PXD020448 (Username: [reviewer87927@ebi.ac.uk](mailto:reviewer87927@ebi.ac.uk), Password: nmA5W4eW).

## References

- 1 Tsai, H. H. *et al.* Regional astrocyte allocation regulates CNS synaptogenesis and repair. *Science* **337**, 358-362, doi:10.1126/science.1222381 (2012).
- 2 Boulay, A. C. *et al.* Hearing is normal without connexin30. *J Neurosci* **33**, 430-434, doi:10.1523/JNEUROSCI.4240-12.2013 (2013).
- 3 Zhuo, L. *et al.* hGFAP-cre transgenic mice for manipulation of glial and neuronal function in vivo. *Genesis* **31**, 85-94, doi:10.1002/gene.10008 (2001).
- 4 Rouach, N., Calvo, C. F., Glowinski, J. & Giaume, C. Brain macrophages inhibit gap junctional communication and downregulate connexin 43 expression in cultured

- astrocytes. *Eur J Neurosci* **15**, 403-407, doi:10.1046/j.0953-816x.2001.01868.x (2002).
- 5 Qamar Saeed, M. *et al.* Comparison Between Several Integrase-defective Lentiviral Vectors Reveals Increased Integration of an HIV Vector Bearing a D167H Mutant. *Mol Ther Nucleic Acids* **3**, e213, doi:10.1038/mtna.2014.65 (2014).
- 6 Berger, A. *et al.* Repair of rhodopsin mRNA by spliceosome-mediated RNA trans-splicing: a new approach for autosomal dominant retinitis pigmentosa. *Mol Ther* **23**, 918-930, doi:10.1038/mt.2015.11 (2015).
- 7 Cahoy, J. D. *et al.* A transcriptome database for astrocytes, neurons, and oligodendrocytes: a new resource for understanding brain development and function. *J Neurosci* **28**, 264-278, doi:10.1523/JNEUROSCI.4178-07.2008 (2008).
- 8 Pillet, L. E. *et al.* The intellectual disability protein Oligophrenin-1 controls astrocyte morphology and migration. *Glia* **68**, 1729-1742, doi:10.1002/glia.23801 (2020).
- 9 Pouillet, P., Carpentier, S. & Barillot, E. myProMS, a web server for management and validation of mass spectrometry-based proteomic data. *Proteomics* **7**, 2553-2556, doi:10.1002/pmic.200600784 (2007).
- 10 The, M., MacCoss, M. J., Noble, W. S. & Kall, L. Fast and Accurate Protein False Discovery Rates on Large-Scale Proteomics Data Sets with Percolator 3.0. *J Am Soc Mass Spectrom* **27**, 1719-1727, doi:10.1007/s13361-016-1460-7 (2016).
- 11 Valot, B., Langella, O., Nano, E. & Zivy, M. MassChroQ: a versatile tool for mass spectrometry quantification. *Proteomics* **11**, 3572-3577, doi:10.1002/pmic.201100120 (2011).
- 12 Jassal, B. *et al.* The reactome pathway knowledgebase. *Nucleic Acids Res* **48**, D498-D503, doi:10.1093/nar/gkz1031 (2020).
- 13 Cang, J. *et al.* Development of precise maps in visual cortex requires patterned spontaneous activity in the retina. *Neuron* **48**, 797-809, doi:10.1016/j.neuron.2005.09.015 (2005).
- 14 Kalatsky, V. A. & Stryker, M. P. New paradigm for optical imaging: temporally encoded maps of intrinsic signal. *Neuron* **38**, 529-545, doi:10.1016/s0896-6273(03)00286-1 (2003).
- 15 Yokoo, T., Knight, B. W. & Sirovich, L. An optimization approach to signal extraction from noisy multivariate data. *Neuroimage* **14**, 1309-1326, doi:10.1006/nimg.2001.0950 (2001).
- 16 Meunier, C. N. *et al.* D-Serine and Glycine Differentially Control Neurotransmission during Visual Cortex Critical Period. *PLoS One* **11**, e0151233, doi:10.1371/journal.pone.0151233 (2016).
- 17 Monier, C., Fournier, J. & Fregnac, Y. In vitro and in vivo measures of evoked excitatory and inhibitory conductance dynamics in sensory cortices. *J Neurosci Methods* **169**, 323-365, doi:10.1016/j.jneumeth.2007.11.008 (2008).
- 18 Meziane, H. *et al.* Fasudil treatment in adult reverses behavioural changes and brain ventricular enlargement in Oligophrenin-1 mouse model of intellectual disability. *Hum Mol Genet* **25**, 2314-2323, doi:10.1093/hmg/ddw102 (2016).
- 19 Perez-Riverol, Y. *et al.* The PRIDE database and related tools and resources in 2019: improving support for quantification data. *Nucleic Acids Res* **47**, D442-D450, doi:10.1093/nar/gky1106 (2019).
